# Supplementary material
Source: HighWire-hosted journal article supplement (https://bmjopen.bmj.com/content/10/2/e034058)
Supplement: inline-supplementary-material-2 [file inline-supplementary-material-2.pdf]

# Consent Form

Annex 1

**Dear Participant,**

## Purposive Selection

You have been purposively selected to be part of this thesis and this is why we would like to interview you. This thesis is being conducted by **Palash Chandra Banik**, a student of M.Phil in Non-communicable Diseases at Bangladesh Institute of Health Sciences (BIHS) under Bangabandhu Sheikh Mujib Medical University (BSMMU). This type of study is currently taking place in several countries around the world.

## Title of Thesis

The title of this thesis is “**Risk of foot ulcer and its determinants among Type 2 diabetic subjects**”.

## Aim of the Thesis

To determine diabetic patients at risk for foot ulceration through a multi-center hospital based study in Bangladesh

## Data Collection Methods

**Step 1-** Interview questions

**Step 2-** Physical examination & screening test (foot)

## Timeframe

It is estimated that step 1 & 2 of this study will take approximately 30-40 minutes.

## Confidentiality

The information you provide is totally confidential and will not be disclosed to anyone. It will only be used for research purposes. Your name, address, and other personal information will be removed from the instrument, and only a code will be used to connect your name and your answers without identifying you.

## Results

The results of this thesis will be used to help plan strategies in reducing the risk factor that contribute to diabetic foot ulcer among the diabetic patients as well as chronic non-communicable diseases in Bangladesh.

The results will be published in research publications, media briefings and reports and can be made available to you by local health workers.

## Voluntary Participation

Your participation is voluntary and you can withdraw from the study after having agreed to participate. You are free to refuse to answer any question that is asked in the questionnaire. If you have any questions about this study you may ask me or contact to the researcher [Palash Chandra Banik, cell: +8801710972498].

## Consent to Participate

Signing this consent indicates that you understand what will be expected of you and are willing to participate in this survey.

|                     |  |             |  |
|---------------------|--|-------------|--|
| Read by Participant |  | Interviewer |  |
| Agreed              |  | Refused     |  |

## Signatures

I hereby provide INFORMED CONSENT to take part in Steps 1 and 2 of this Risk Factor Study.

**Name of the participant:**

**Witness:**

**Sign or fingerprint**

**Sign or fingerprint**
