# Supplementary material
Source: HighWire-hosted journal article supplement (https://bmjopen.bmj.com/content/10/2/e034058)
Supplement: inline-supplementary-material-3 [file inline-supplementary-material-3.pdf]

BIRDEM Form No.-114

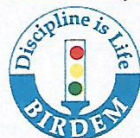**BIRDEM**An Enterprise of the  
Diabetic Association of  
Bangladesh**Bangladesh Institute of Research  
and Rehabilitation in Diabetes,  
Endocrine and Metabolic Disorders**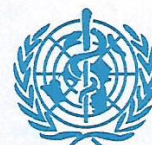WHO Collaborating Centre  
for Prevention and Control  
of Diabetes

Memo No: BADAS/BIO/EA/11/033

Date: 17.01.2011

**To**  
**Palash Chandra Banik**  
**Student, MPhil in Noncommunicable Diseases (NCD)**  
**Department of Community Medicine (CM)**  
**Bangladesh Institute of Health Sciences (BIHS)**

***Subject: Ethical Clearance***

The Ethical Review Committee (ERC) of the Bangladesh Diabetic Association (BADAS) has the pleasure to accord ethical clearance to your Protocol "**Risk of foot ulcer and its determinants among type 2 diabetic subjects in Bangladesh**" subject to the condition that the guidelines must be followed carefully.

- The Ethical Review Committee approves this study from an ethical point of view upon the addressing by the researchers of the concerns as raised by the ERC affiliates.
- Approval is given for three years. Projects, which have not commenced within two years of original approval, must be re-submitted to ERC. You must inform ERC when the research has been completed.
- Any serious adverse events or significant change which occurs in connection with this study and/or which may alter its ethical considerations must be reported immediately to the ERC.
- Approval is given on the understanding that the 'Guidelines for Ethical Review' are adhered to.

**(Prof. Tofail Ahmed, PhD)**  
Chairman  
Ethical Review Committee

Ibrahim Memorial Diabetes Centre, 122 Kazi Nazrul Islam Avenue, Dhaka-1000, Bangladesh.  
Phone : 8616641-50, 9661551-60, Fax : 880-2-9667812, Cable : BIRDEM
