# Supplementary material
Source: HighWire-hosted journal article supplement (https://bmjopen.bmj.com/content/10/2/e034058)
Supplement: inline-supplementary-material-4 [file inline-supplementary-material-4.pdf]

| id | Center | Q1_age | Q1a_sex | rec_area | rec_edu | rec_occ | rec_marr |
|----|--------|--------|---------|----------|---------|---------|----------|
| 1  | 1      | 70     | 2       | 1        | 2       | 2       | 1        |
| 2  | 1      | 55     | 2       | 2        | 3       | 3       | 1        |
| 3  | 1      | 35     | 2       | 1        | 4       | 1       | 1        |
| 4  | 1      | 57     | 2       | 1        | 3       | 3       | 1        |
| 5  | 1      | 57     | 2       | 1        | 3       | 3       | 1        |
| 6  | 1      | 50     | 2       | 1        | 2       | 3       | 1        |
| 7  | 1      | 56     | 2       | 1        | 1       | 3       | 1        |
| 8  | 1      | 55     | 2       | 1        | 2       | 3       | 1        |
| 9  | 1      | 70     | 2       | 1        | 2       | 3       | 1        |
| 10 | 1      | 75     | 2       | 1        | 2       | 3       | 1        |
| 11 | 1      | 65     | 2       | 1        | 2       | 3       | 1        |
| 12 | 1      | 60     | 2       | 1        | 2       | 3       | 1        |
| 13 | 1      | 45     | 1       | 1        | 4       | 1       | 1        |
| 14 | 1      | 58     | 2       | 1        | 3       | 3       | 1        |
| 15 | 1      | 47     | 2       | 2        | 1       | 3       | 1        |
| 16 | 1      | 62     | 1       | 1        | 4       | 1       | 1        |
| 17 | 1      | 45     | 1       | 1        | 4       | 1       | 1        |
| 18 | 1      | 34     | 1       | 2        | 2       | 4       | 1        |
| 19 | 1      | 68     | 1       | 1        | 3       | 1       | 1        |
| 20 | 1      | 58     | 1       | 1        | 4       | 2       | 1        |
| 21 | 1      | 60     | 1       | 1        | 2       | 4       | 1        |
| 22 | 1      | 51     | 2       | 2        | 2       | 3       | 1        |
| 23 | 1      | 53     | 1       | 1        | 3       | 2       | 1        |
| 24 | 1      | 70     | 1       | 1        | 4       | 1       | 1        |
| 25 | 1      | 70     | 1       | 1        | 2       | 1       | 1        |
| 26 | 1      | 27     | 1       | 1        | 4       | 1       | 1        |
| 27 | 1      | 60     | 1       | 1        | 2       | 1       | 1        |
| 28 | 1      | 73     | 1       | 1        | 4       | 1       | 1        |
| 29 | 1      | 55     | 1       | 2        | 2       | 1       | 1        |
| 30 | 1      | 55     | 1       | 1        | 4       | 2       | 1        |
| 31 | 1      | 44     | 1       | 1        | 2       | 2       | 1        |
| 32 | 1      | 50     | 1       | 1        | 4       | 4       | 1        |
| 33 | 1      | 67     | 1       | 1        | 4       | 1       | 1        |
| 34 | 1      | 77     | 1       | 1        | 2       | 4       | 1        |
| 35 | 1      | 44     | 1       | 1        | 4       | 1       | 1        |
| 36 | 1      | 40     | 1       | 2        | 4       | 1       | 1        |
| 37 | 1      | 80     | 1       | 1        | 4       | 1       | 1        |
| 38 | 1      | 63     | 1       | 1        | 2       | 1       | 1        |
| 39 | 1      | 50     | 1       | 1        | 3       | 2       | 1        |
| 40 | 1      | 50     | 1       | 1        | 4       | 1       | 1        |
| 41 | 1      | 50     | 1       | 1        | 4       | 1       | 1        |
| 42 | 1      | 80     | 1       | 1        | 3       | 1       | 1        |
| 43 | 1      | 50     | 1       | 2        | 3       | 1       | 1        |
| 44 | 1      | 48     | 1       | 1        | 4       | 1       | 1        |
| 45 | 1      | 72     | 1       | 1        | 3       | 1       | 1        |
| 46 | 1      | 58     | 1       | 1        | 2       | 2       | 1        |
| 47 | 1      | 59     | 1       | 1        | 3       | 1       | 1        |
| 48 | 1      | 65     | 1       | 1        | 4       | 1       | 1        |

|    |   |    |   |   |   |   |   |
|----|---|----|---|---|---|---|---|
| 49 | 1 | 54 | 1 | 1 | 2 | 4 | 1 |
| 50 | 1 | 58 | 1 | 1 | 2 | 4 | 1 |
| 51 | 1 | 67 | 1 | 1 | 4 | 1 | 1 |
| 52 | 1 | 50 | 1 | 1 | 4 | 1 | 1 |
| 53 | 1 | 65 | 1 | 1 | 4 | 2 | 1 |
| 54 | 1 | 78 | 1 | 1 | 4 | 1 | 1 |
| 55 | 1 | 55 | 1 | 1 | 4 | 1 | 1 |
| 56 | 1 | 41 | 1 | 1 | 4 | 4 | 1 |
| 57 | 1 | 75 | 1 | 1 | 4 | 2 | 1 |
| 58 | 1 | 76 | 1 | 1 | 4 | 1 | 1 |
| 59 | 1 | 52 | 1 | 1 | 4 | 1 | 1 |
| 60 | 1 | 51 | 1 | 2 | 3 | 2 | 1 |
| 61 | 1 | 63 | 1 | 1 | 2 | 1 | 1 |
| 62 | 1 | 68 | 1 | 1 | 4 | 1 | 1 |
| 63 | 1 | 58 | 1 | 1 | 2 | 2 | 1 |
| 64 | 1 | 62 | 1 | 1 | 4 | 1 | 1 |
| 65 | 1 | 50 | 1 | 1 | 3 | 1 | 1 |
| 66 | 1 | 65 | 1 | 1 | 3 | 1 | 1 |
| 67 | 1 | 61 | 1 | 1 | 3 | 4 | 1 |
| 68 | 1 | 66 | 1 | 1 | 2 | 2 | 1 |
| 69 | 1 | 40 | 1 | 1 | 3 | 2 | 1 |
| 70 | 1 | 48 | 1 | 1 | 4 | 4 | 1 |
| 71 | 1 | 37 | 2 | 2 | 2 | 3 | 1 |
| 72 | 1 | 42 | 2 | 1 | 2 | 3 | 1 |
| 73 | 1 | 63 | 2 | 1 | 2 | 3 | 1 |
| 74 | 1 | 56 | 2 | 1 | 2 | 3 | 1 |
| 75 | 1 | 70 | 2 | 1 | 3 | 3 | 1 |
| 76 | 1 | 50 | 2 | 2 | 1 | 3 | 1 |
| 77 | 1 | 71 | 2 | 1 | 2 | 3 | 1 |
| 78 | 1 | 70 | 2 | 1 | 2 | 3 | 1 |
| 79 | 1 | 58 | 2 | 1 | 4 | 3 | 1 |
| 80 | 1 | 70 | 1 | 1 | 2 | 3 | 1 |
| 81 | 1 | 44 | 2 | 1 | 1 | 4 | 1 |
| 82 | 1 | 55 | 2 | 1 | 4 | 1 | 1 |
| 83 | 1 | 41 | 2 | 1 | 4 | 1 | 1 |
| 84 | 1 | 52 | 2 | 1 | 2 | 3 | 1 |
| 85 | 1 | 52 | 2 | 1 | 2 | 3 | 1 |
| 86 | 1 | 55 | 2 | 1 | 4 | 1 | 1 |
| 87 | 1 | 55 | 2 | 1 | 2 | 1 | 1 |
| 88 | 1 | 50 | 2 | 1 | 3 | 3 | 1 |
| 89 | 1 | 59 | 2 | 1 | 3 | 3 | 1 |
| 90 | 1 | 52 | 2 | 2 | 2 | 3 | 1 |
| 91 | 1 | 42 | 2 | 2 | 3 | 1 | 1 |
| 92 | 1 | 56 | 2 | 1 | 2 | 3 | 1 |
| 93 | 1 | 50 | 2 | 1 | 4 | 1 | 1 |
| 94 | 1 | 33 | 2 | 1 | 3 | 3 | 1 |
| 95 | 1 | 52 | 2 | 1 | 2 | 3 | 1 |
| 96 | 1 | 55 | 2 | 1 | 2 | 3 | 1 |
| 97 | 1 | 45 | 2 | 2 | 2 | 3 | 1 |
| 98 | 1 | 65 | 2 | 1 | 2 | 3 | 1 |

|     |   |    |   |   |   |   |   |
|-----|---|----|---|---|---|---|---|
| 99  | 1 | 58 | 2 | 1 | 3 | 3 | 1 |
| 100 | 1 | 45 | 2 | 1 | 3 | 3 | 1 |
| 101 | 1 | 57 | 2 | 1 | 2 | 3 | 1 |
| 102 | 1 | 30 | 2 | 1 | 2 | 3 | 1 |
| 103 | 1 | 52 | 2 | 1 | 1 | 3 | 1 |
| 104 | 1 | 47 | 2 | 1 | 2 | 3 | 1 |
| 105 | 1 | 68 | 2 | 1 | 1 | 4 | 1 |
| 106 | 1 | 42 | 2 | 2 | 3 | 3 | 1 |
| 107 | 1 | 68 | 2 | 1 | 4 | 3 | 1 |
| 108 | 1 | 43 | 2 | 1 | 2 | 3 | 1 |
| 109 | 1 | 65 | 2 | 2 | 1 | 3 | 1 |
| 110 | 1 | 71 | 2 | 1 | 3 | 1 | 1 |
| 111 | 1 | 50 | 2 | 1 | 2 | 3 | 1 |
| 112 | 1 | 70 | 2 | 1 | 2 | 3 | 1 |
| 113 | 1 | 65 | 2 | 2 | 1 | 3 | 1 |
| 114 | 1 | 35 | 2 | 1 | 1 | 3 | 1 |
| 115 | 1 | 32 | 2 | 1 | 2 | 3 | 1 |
| 116 | 1 | 45 | 2 | 1 | 1 | 3 | 1 |
| 117 | 1 | 65 | 2 | 1 | 3 | 3 | 1 |
| 118 | 1 | 64 | 2 | 1 | 2 | 3 | 1 |
| 119 | 1 | 60 | 2 | 1 | 3 | 3 | 1 |
| 120 | 1 | 52 | 2 | 1 | 2 | 3 | 1 |
| 121 | 1 | 45 | 2 | 1 | 2 | 3 | 1 |
| 122 | 1 | 45 | 2 | 1 | 2 | 3 | 1 |
| 123 | 1 | 40 | 2 | 1 | 2 | 3 | 1 |
| 124 | 1 | 32 | 2 | 1 | 4 | 1 | 1 |
| 125 | 1 | 75 | 2 | 1 | 2 | 3 | 1 |
| 126 | 1 | 50 | 2 | 1 | 2 | 3 | 1 |
| 127 | 1 | 68 | 2 | 2 | 2 | 3 | 1 |
| 128 | 1 | 60 | 2 | 1 | 2 | 3 | 1 |
| 129 | 1 | 50 | 2 | 1 | 2 | 3 | 1 |
| 130 | 1 | 45 | 2 | 1 | 3 | 3 | 1 |
| 131 | 1 | 61 | 2 | 1 | 2 | 3 | 1 |
| 132 | 1 | 55 | 2 | 1 | 3 | 3 | 1 |
| 133 | 1 | 50 | 2 | 1 | 3 | 3 | 1 |
| 134 | 1 | 45 | 2 | 1 | 2 | 3 | 1 |
| 135 | 1 | 45 | 2 | 1 | 2 | 3 | 1 |
| 136 | 1 | 52 | 2 | 1 | 3 | 3 | 1 |
| 137 | 1 | 62 | 2 | 1 | 2 | 3 | 1 |
| 138 | 1 | 62 | 2 | 1 | 2 | 3 | 1 |
| 139 | 1 | 82 | 2 | 1 | 2 | 3 | 1 |
| 140 | 1 | 60 | 2 | 1 | 3 | 3 | 1 |
| 141 | 1 | 59 | 2 | 1 | 3 | 3 | 1 |
| 142 | 1 | 57 | 2 | 1 | 2 | 3 | 1 |
| 143 | 1 | 60 | 2 | 1 | 2 | 3 | 1 |
| 144 | 1 | 55 | 2 | 1 | 3 | 3 | 1 |
| 145 | 1 | 50 | 2 | 1 | 3 | 3 | 1 |
| 146 | 1 | 50 | 2 | 1 | 3 | 3 | 1 |
| 147 | 1 | 55 | 2 | 1 | 4 | 1 | 1 |
| 148 | 1 | 75 | 2 | 1 | 4 | 4 | 1 |

|     |   |    |   |   |   |   |   |
|-----|---|----|---|---|---|---|---|
| 149 | 1 | 50 | 2 | 1 | 2 | 3 | 1 |
| 150 | 1 | 44 | 2 | 1 | 3 | 3 | 1 |
| 151 | 1 | 37 | 2 | 1 | 2 | 3 | 1 |
| 152 | 1 | 40 | 2 | 1 | 1 | 3 | 1 |
| 153 | 1 | 85 | 2 | 1 | 2 | 3 | 1 |
| 154 | 1 | 43 | 2 | 1 | 3 | 4 | 1 |
| 155 | 1 | 65 | 2 | 1 | 2 | 3 | 1 |
| 156 | 1 | 63 | 2 | 1 | 2 | 3 | 1 |
| 157 | 1 | 55 | 2 | 1 | 3 | 3 | 1 |
| 158 | 1 | 53 | 2 | 1 | 2 | 3 | 1 |
| 159 | 1 | 62 | 2 | 1 | 2 | 3 | 1 |
| 160 | 1 | 65 | 2 | 1 | 4 | 3 | 1 |
| 161 | 1 | 34 | 2 | 1 | 4 | 3 | 1 |
| 162 | 1 | 63 | 2 | 1 | 3 | 3 | 1 |
| 163 | 1 | 60 | 2 | 1 | 2 | 3 | 1 |
| 164 | 1 | 43 | 2 | 1 | 2 | 3 | 1 |
| 165 | 1 | 65 | 2 | 1 | 2 | 3 | 1 |
| 166 | 1 | 56 | 2 | 1 | 4 | 3 | 1 |
| 167 | 1 | 40 | 2 | 1 | 2 | 3 | 1 |
| 168 | 1 | 40 | 2 | 1 | 4 | 3 | 1 |
| 169 | 1 | 55 | 2 | 1 | 2 | 3 | 1 |
| 170 | 1 | 66 | 2 | 1 | 3 | 3 | 1 |
| 171 | 1 | 70 | 2 | 1 | 4 | 3 | 1 |
| 172 | 1 | 47 | 2 | 1 | 3 | 3 | 1 |
| 173 | 1 | 45 | 2 | 1 | 1 | 3 | 1 |
| 174 | 1 | 36 | 2 | 1 | 3 | 3 | 1 |
| 175 | 1 | 52 | 2 | 1 | 2 | 3 | 1 |
| 176 | 1 | 57 | 2 | 1 | 3 | 3 | 1 |
| 177 | 1 | 20 | 2 | 1 | 3 | 3 | 1 |
| 178 | 1 | 50 | 2 | 1 | 4 | 1 | 1 |
| 179 | 1 | 57 | 2 | 1 | 4 | 3 | 1 |
| 180 | 1 | 40 | 2 | 1 | 4 | 1 | 1 |
| 181 | 1 | 51 | 2 | 1 | 2 | 3 | 1 |
| 182 | 1 | 50 | 2 | 1 | 4 | 3 | 1 |
| 183 | 1 | 45 | 2 | 1 | 3 | 3 | 1 |
| 184 | 1 | 40 | 2 | 1 | 3 | 3 | 1 |
| 185 | 1 | 62 | 2 | 1 | 3 | 3 | 1 |
| 186 | 1 | 38 | 2 | 1 | 3 | 3 | 1 |
| 187 | 1 | 52 | 2 | 1 | 2 | 3 | 1 |
| 188 | 1 | 50 | 2 | 1 | 2 | 3 | 1 |
| 189 | 1 | 65 | 2 | 1 | 3 | 3 | 1 |
| 190 | 1 | 55 | 2 | 1 | 2 | 3 | 1 |
| 191 | 1 | 50 | 2 | 1 | 1 | 3 | 1 |
| 192 | 1 | 65 | 2 | 2 | 2 | 3 | 1 |
| 193 | 1 | 50 | 2 | 1 | 2 | 3 | 1 |
| 194 | 1 | 46 | 2 | 1 | 4 | 1 | 1 |
| 195 | 1 | 51 | 2 | 1 | 3 | 3 | 1 |
| 196 | 1 | 60 | 2 | 1 | 2 | 3 | 1 |
| 197 | 1 | 55 | 2 | 1 | 2 | 3 | 1 |
| 198 | 1 | 48 | 2 | 1 | 3 | 3 | 1 |

|     |   |    |   |   |   |   |   |
|-----|---|----|---|---|---|---|---|
| 199 | 1 | 65 | 2 | 1 | 4 | 2 | 1 |
| 200 | 1 | 56 | 2 | 1 | 1 | 3 | 1 |
| 201 | 1 | 34 | 2 | 1 | 3 | 4 | 1 |
| 202 | 1 | 46 | 2 | 1 | 3 | 3 | 1 |
| 203 | 1 | 56 | 2 | 2 | 1 | 4 | 1 |
| 204 | 1 | 58 | 2 | 1 | 2 | 3 | 1 |
| 205 | 1 | 30 | 2 | 1 | 4 | 1 | 1 |
| 206 | 1 | 47 | 2 | 1 | 3 | 3 | 1 |
| 207 | 1 | 62 | 2 | 1 | 2 | 3 | 1 |
| 208 | 1 | 57 | 2 | 1 | 3 | 3 | 1 |
| 209 | 1 | 37 | 2 | 1 | 4 | 3 | 1 |
| 210 | 1 | 35 | 2 | 1 | 3 | 3 | 1 |
| 211 | 1 | 47 | 2 | 1 | 2 | 3 | 1 |
| 212 | 1 | 50 | 2 | 1 | 4 | 3 | 1 |
| 213 | 1 | 50 | 1 | 1 | 3 | 2 | 1 |
| 214 | 1 | 50 | 1 | 1 | 4 | 1 | 1 |
| 215 | 1 | 45 | 1 | 1 | 4 | 4 | 1 |
| 216 | 1 | 61 | 1 | 1 | 1 | 2 | 1 |
| 217 | 1 | 41 | 1 | 1 | 3 | 4 | 1 |
| 218 | 1 | 32 | 1 | 1 | 4 | 1 | 1 |
| 219 | 1 | 65 | 1 | 1 | 3 | 1 | 1 |
| 220 | 1 | 35 | 1 | 1 | 2 | 2 | 1 |
| 221 | 1 | 45 | 1 | 1 | 4 | 1 | 1 |
| 222 | 1 | 50 | 1 | 1 | 4 | 4 | 1 |
| 223 | 1 | 48 | 1 | 1 | 4 | 1 | 1 |
| 224 | 1 | 65 | 1 | 1 | 4 | 1 | 1 |
| 225 | 1 | 35 | 1 | 1 | 3 | 1 | 1 |
| 226 | 1 | 50 | 1 | 1 | 3 | 1 | 1 |
| 227 | 1 | 42 | 1 | 1 | 4 | 2 | 1 |
| 228 | 1 | 38 | 1 | 1 | 3 | 1 | 1 |
| 229 | 1 | 30 | 1 | 1 | 4 | 4 | 1 |
| 230 | 1 | 48 | 1 | 1 | 4 | 1 | 1 |
| 231 | 1 | 40 | 1 | 1 | 4 | 1 | 1 |
| 232 | 1 | 30 | 1 | 1 | 3 | 1 | 1 |
| 233 | 1 | 63 | 1 | 1 | 3 | 2 | 1 |
| 234 | 1 | 48 | 1 | 1 | 4 | 1 | 1 |
| 235 | 1 | 52 | 1 | 1 | 4 | 1 | 2 |
| 236 | 1 | 45 | 1 | 1 | 2 | 4 | 1 |
| 237 | 1 | 38 | 1 | 1 | 4 | 1 | 1 |
| 238 | 1 | 54 | 1 | 1 | 4 | 2 | 1 |
| 239 | 1 | 43 | 1 | 1 | 4 | 4 | 1 |
| 240 | 1 | 70 | 1 | 1 | 3 | 1 | 1 |
| 241 | 1 | 32 | 1 | 1 | 4 | 4 | 1 |
| 242 | 1 | 52 | 1 | 1 | 2 | 2 | 1 |
| 243 | 1 | 55 | 1 | 1 | 3 | 1 | 1 |
| 244 | 1 | 65 | 1 | 1 | 3 | 1 | 1 |
| 245 | 1 | 48 | 1 | 1 | 3 | 2 | 1 |
| 246 | 1 | 50 | 1 | 1 | 2 | 2 | 1 |
| 247 | 1 | 41 | 1 | 1 | 4 | 1 | 1 |
| 248 | 1 | 70 | 1 | 1 | 4 | 1 | 1 |

|     |   |    |   |   |   |   |   |
|-----|---|----|---|---|---|---|---|
| 249 | 1 | 70 | 1 | 1 | 3 | 2 | 1 |
| 250 | 1 | 45 | 1 | 1 | 2 | 2 | 1 |
| 251 | 1 | 40 | 1 | 1 | 4 | 3 | 1 |
| 252 | 1 | 52 | 1 | 1 | 3 | 3 | 1 |
| 253 | 1 | 36 | 1 | 1 | 2 | 3 | 1 |
| 254 | 1 | 25 | 1 | 1 | 4 | 3 | 1 |
| 255 | 1 | 45 | 1 | 1 | 3 | 2 | 1 |
| 256 | 1 | 67 | 1 | 1 | 4 | 1 | 1 |
| 257 | 1 | 65 | 1 | 1 | 4 | 4 | 1 |
| 258 | 1 | 58 | 1 | 1 | 1 | 2 | 1 |
| 259 | 1 | 48 | 1 | 1 | 3 | 4 | 1 |
| 260 | 1 | 58 | 1 | 1 | 2 | 2 | 1 |
| 261 | 1 | 54 | 1 | 1 | 4 | 3 | 1 |
| 262 | 1 | 45 | 1 | 1 | 3 | 3 | 1 |
| 263 | 1 | 55 | 1 | 1 | 2 | 3 | 1 |
| 264 | 1 | 48 | 1 | 1 | 4 | 3 | 1 |
| 265 | 1 | 40 | 1 | 1 | 3 | 2 | 1 |
| 266 | 1 | 42 | 1 | 1 | 4 | 1 | 1 |
| 267 | 1 | 60 | 1 | 1 | 4 | 4 | 1 |
| 268 | 1 | 40 | 1 | 1 | 1 | 2 | 1 |
| 269 | 1 | 40 | 1 | 1 | 3 | 4 | 1 |
| 270 | 1 | 38 | 1 | 1 | 4 | 1 | 1 |
| 271 | 1 | 72 | 2 | 2 | 1 | 3 | 1 |
| 272 | 1 | 30 | 2 | 1 | 3 | 3 | 1 |
| 273 | 1 | 48 | 2 | 1 | 2 | 3 | 1 |
| 274 | 1 | 56 | 2 | 2 | 2 | 3 | 1 |
| 275 | 1 | 40 | 2 | 1 | 2 | 3 | 1 |
| 276 | 1 | 30 | 2 | 1 | 1 | 3 | 1 |
| 277 | 1 | 63 | 2 | 1 | 1 | 3 | 1 |
| 278 | 1 | 48 | 2 | 1 | 1 | 3 | 1 |
| 279 | 1 | 52 | 2 | 1 | 1 | 3 | 1 |
| 280 | 1 | 55 | 2 | 2 | 2 | 3 | 1 |
| 281 | 1 | 45 | 2 | 1 | 2 | 3 | 1 |
| 282 | 1 | 40 | 2 | 1 | 1 | 3 | 1 |
| 283 | 1 | 50 | 2 | 2 | 1 | 3 | 1 |
| 284 | 1 | 38 | 2 | 1 | 3 | 3 | 1 |
| 285 | 1 | 30 | 2 | 1 | 2 | 3 | 1 |
| 286 | 1 | 58 | 2 | 2 | 2 | 3 | 1 |
| 287 | 1 | 48 | 1 | 1 | 2 | 3 | 1 |
| 288 | 1 | 40 | 1 | 1 | 3 | 4 | 1 |
| 289 | 1 | 30 | 1 | 1 | 3 | 3 | 1 |
| 290 | 1 | 62 | 1 | 2 | 1 | 4 | 1 |
| 291 | 1 | 63 | 1 | 1 | 2 | 3 | 1 |
| 292 | 1 | 48 | 1 | 1 | 4 | 1 | 1 |
| 293 | 1 | 52 | 1 | 1 | 3 | 3 | 1 |
| 294 | 1 | 45 | 1 | 1 | 2 | 3 | 1 |
| 295 | 1 | 45 | 1 | 2 | 3 | 3 | 1 |
| 296 | 1 | 38 | 1 | 1 | 3 | 1 | 1 |
| 297 | 1 | 30 | 1 | 1 | 3 | 3 | 1 |
| 298 | 1 | 43 | 1 | 1 | 2 | 3 | 1 |

|     |   |    |   |   |   |   |   |
|-----|---|----|---|---|---|---|---|
| 299 | 1 | 54 | 2 | 1 | 3 | 3 | 1 |
| 300 | 1 | 48 | 1 | 2 | 1 | 4 | 1 |
| 301 | 1 | 45 | 1 | 2 | 3 | 1 | 1 |
| 302 | 1 | 60 | 1 | 2 | 3 | 1 | 1 |
| 303 | 1 | 45 | 1 | 2 | 4 | 1 | 1 |
| 304 | 1 | 55 | 1 | 1 | 1 | 4 | 1 |
| 305 | 1 | 43 | 2 | 1 | 1 | 3 | 1 |
| 306 | 1 | 60 | 2 | 1 | 2 | 3 | 1 |
| 307 | 1 | 55 | 2 | 1 | 1 | 3 | 1 |
| 308 | 1 | 55 | 1 | 1 | 4 | 4 | 1 |
| 309 | 1 | 60 | 2 | 1 | 2 | 3 | 1 |
| 310 | 1 | 55 | 1 | 2 | 2 | 4 | 1 |
| 311 | 1 | 40 | 2 | 1 | 2 | 3 | 1 |
| 312 | 1 | 58 | 2 | 1 | 2 | 3 | 1 |
| 313 | 1 | 60 | 2 | 1 | 2 | 3 | 1 |
| 314 | 1 | 54 | 2 | 1 | 2 | 3 | 1 |
| 315 | 1 | 37 | 2 | 2 | 3 | 3 | 1 |
| 316 | 1 | 65 | 2 | 2 | 2 | 3 | 1 |
| 317 | 1 | 85 | 2 | 2 | 1 | 3 | 1 |
| 318 | 1 | 55 | 2 | 1 | 2 | 3 | 1 |
| 319 | 1 | 60 | 2 | 1 | 3 | 3 | 1 |
| 320 | 1 | 55 | 2 | 1 | 3 | 3 | 1 |
| 321 | 1 | 60 | 2 | 1 | 3 | 3 | 1 |
| 322 | 1 | 65 | 2 | 1 | 1 | 3 | 1 |
| 323 | 1 | 38 | 2 | 1 | 2 | 3 | 1 |
| 324 | 1 | 50 | 2 | 1 | 1 | 3 | 1 |
| 325 | 1 | 43 | 2 | 2 | 2 | 3 | 1 |
| 326 | 1 | 50 | 2 | 1 | 2 | 3 | 1 |
| 327 | 1 | 55 | 1 | 1 | 3 | 2 | 1 |
| 328 | 1 | 60 | 1 | 1 | 3 | 1 | 1 |
| 329 | 1 | 26 | 1 | 1 | 3 | 2 | 1 |
| 330 | 1 | 53 | 1 | 1 | 3 | 1 | 1 |
| 331 | 1 | 60 | 1 | 1 | 2 | 1 | 1 |
| 332 | 1 | 55 | 1 | 2 | 3 | 1 | 1 |
| 333 | 1 | 51 | 1 | 1 | 3 | 1 | 1 |
| 334 | 1 | 50 | 1 | 1 | 3 | 1 | 1 |
| 335 | 1 | 28 | 2 | 1 | 2 | 1 | 1 |
| 336 | 1 | 65 | 2 | 1 | 2 | 3 | 1 |
| 337 | 1 | 66 | 2 | 1 | 3 | 3 | 1 |
| 338 | 1 | 69 | 2 | 1 | 3 | 3 | 1 |
| 339 | 1 | 52 | 2 | 1 | 2 | 3 | 1 |
| 340 | 1 | 45 | 2 | 2 | 1 | 3 | 1 |
| 341 | 1 | 70 | 2 | 1 | 3 | 3 | 1 |
| 342 | 1 | 60 | 2 | 1 | 4 | 1 | 1 |
| 343 | 1 | 44 | 2 | 1 | 1 | 3 | 1 |
| 344 | 1 | 61 | 2 | 2 | 3 | 3 | 1 |
| 345 | 1 | 24 | 2 | 1 | 3 | 2 | 1 |
| 346 | 1 | 80 | 1 | 1 | 3 | 4 | 2 |
| 347 | 1 | 75 | 1 | 1 | 3 | 2 | 1 |
| 348 | 1 | 50 | 1 | 1 | 2 | 1 | 1 |

|     |   |    |   |   |   |   |   |
|-----|---|----|---|---|---|---|---|
| 349 | 1 | 56 | 1 | 1 | 1 | 3 | 1 |
| 350 | 1 | 55 | 1 | 1 | 2 | 1 | 1 |
| 351 | 1 | 50 | 1 | 2 | 4 | 1 | 1 |
| 352 | 1 | 17 | 1 | 2 | 4 | 1 | 1 |
| 353 | 1 | 40 | 1 | 1 | 4 | 1 | 1 |
| 354 | 1 | 47 | 1 | 1 | 3 | 2 | 2 |
| 355 | 1 | 30 | 1 | 1 | 3 | 1 | 1 |
| 356 | 1 | 31 | 2 | 1 | 2 | 3 | 1 |
| 357 | 1 | 50 | 2 | 1 | 4 | 1 | 1 |
| 358 | 1 | 50 | 2 | 1 | 3 | 3 | 1 |
| 359 | 1 | 40 | 2 | 1 | 2 | 3 | 1 |
| 360 | 1 | 60 | 2 | 1 | 3 | 3 | 2 |
| 361 | 1 | 50 | 2 | 1 | 1 | 3 | 1 |
| 362 | 1 | 35 | 2 | 1 | 3 | 3 | 1 |
| 363 | 1 | 44 | 2 | 1 | 2 | 3 | 1 |
| 364 | 1 | 45 | 2 | 2 | 1 | 3 | 1 |
| 365 | 1 | 35 | 2 | 1 | 2 | 3 | 1 |
| 366 | 1 | 35 | 2 | 1 | 2 | 3 | 1 |
| 367 | 1 | 53 | 2 | 1 | 1 | 3 | 1 |
| 368 | 1 | 57 | 2 | 1 | 4 | 3 | 1 |
| 369 | 1 | 56 | 2 | 1 | 2 | 3 | 1 |
| 370 | 1 | 55 | 2 | 1 | 4 | 3 | 1 |
| 371 | 1 | 60 | 2 | 1 | 4 | 1 | 1 |
| 372 | 1 | 50 | 2 | 1 | 1 | 1 | 1 |
| 373 | 1 | 62 | 2 | 1 | 2 | 3 | 1 |
| 374 | 1 | 62 | 2 | 1 | 3 | 3 | 1 |
| 375 | 1 | 45 | 2 | 1 | 3 | 3 | 1 |
| 376 | 1 | 50 | 2 | 1 | 3 | 3 | 1 |
| 377 | 1 | 50 | 2 | 1 | 2 | 3 | 1 |
| 378 | 1 | 52 | 2 | 1 | 3 | 3 | 1 |
| 379 | 1 | 33 | 2 | 1 | 3 | 3 | 2 |
| 380 | 1 | 51 | 2 | 2 | 2 | 3 | 1 |
| 381 | 1 | 25 | 2 | 1 | 1 | 3 | 1 |
| 382 | 1 | 45 | 2 | 1 | 1 | 3 | 1 |
| 383 | 1 | 32 | 2 | 1 | 2 | 3 | 1 |
| 384 | 1 | 63 | 2 | 1 | 2 | 3 | 1 |
| 385 | 1 | 45 | 2 | 1 | 4 | 3 | 1 |
| 386 | 1 | 41 | 2 | 1 | 2 | 3 | 1 |
| 387 | 1 | 40 | 2 | 1 | 3 | 3 | 1 |
| 388 | 1 | 62 | 2 | 1 | 2 | 3 | 1 |
| 389 | 1 | 62 | 2 | 1 | 2 | 3 | 1 |
| 390 | 1 | 65 | 1 | 1 | 4 | 4 | 1 |
| 391 | 1 | 60 | 1 | 1 | 4 | 1 | 1 |
| 392 | 1 | 50 | 1 | 1 | 4 | 1 | 1 |
| 393 | 1 | 35 | 1 | 1 | 4 | 1 | 1 |
| 394 | 1 | 65 | 1 | 1 | 4 | 1 | 1 |
| 395 | 1 | 60 | 1 | 1 | 3 | 2 | 1 |
| 396 | 1 | 52 | 1 | 1 | 4 | 1 | 1 |
| 397 | 1 | 64 | 1 | 1 | 4 | 1 | 1 |
| 398 | 1 | 42 | 1 | 1 | 4 | 1 | 1 |



|     |   |    |   |   |   |   |   |
|-----|---|----|---|---|---|---|---|
| 399 | 1 | 48 | 1 | 1 | 4 | 1 | 1 |
| 400 | 1 | 40 | 1 | 1 | 3 | 1 | 1 |
| 401 | 1 | 53 | 1 | 1 | 3 | 1 | 1 |
| 402 | 1 | 45 | 1 | 1 | 2 | 4 | 1 |
| 403 | 1 | 65 | 1 | 1 | 4 | 4 | 1 |
| 404 | 1 | 60 | 1 | 1 | 3 | 2 | 1 |
| 405 | 1 | 60 | 1 | 1 | 4 | 1 | 1 |
| 406 | 1 | 47 | 1 | 1 | 3 | 2 | 1 |
| 407 | 1 | 38 | 1 | 1 | 3 | 2 | 1 |
| 408 | 1 | 60 | 1 | 1 | 4 | 2 | 1 |
| 409 | 1 | 80 | 1 | 1 | 3 | 2 | 1 |
| 410 | 1 | 38 | 2 | 1 | 2 | 3 | 1 |
| 411 | 1 | 68 | 2 | 1 | 3 | 3 | 1 |
| 412 | 1 | 41 | 2 | 1 | 3 | 3 | 1 |
| 413 | 1 | 47 | 2 | 1 | 3 | 3 | 1 |
| 414 | 1 | 40 | 2 | 1 | 3 | 3 | 1 |
| 415 | 1 | 68 | 2 | 1 | 4 | 4 | 1 |
| 416 | 1 | 49 | 2 | 1 | 3 | 3 | 1 |
| 417 | 1 | 36 | 2 | 1 | 1 | 3 | 1 |
| 418 | 1 | 57 | 2 | 1 | 2 | 3 | 1 |
| 419 | 1 | 60 | 2 | 1 | 3 | 1 | 1 |
| 420 | 1 | 60 | 2 | 1 | 2 | 3 | 1 |
| 421 | 1 | 45 | 2 | 1 | 2 | 3 | 1 |
| 422 | 1 | 67 | 1 | 1 | 3 | 4 | 1 |
| 423 | 1 | 65 | 1 | 1 | 4 | 1 | 1 |
| 424 | 1 | 80 | 1 | 1 | 4 | 1 | 1 |
| 425 | 1 | 30 | 1 | 1 | 3 | 2 | 1 |
| 426 | 1 | 65 | 1 | 1 | 3 | 4 | 1 |
| 427 | 1 | 40 | 1 | 1 | 3 | 2 | 1 |
| 428 | 1 | 50 | 1 | 1 | 4 | 1 | 1 |
| 429 | 1 | 28 | 1 | 1 | 4 | 4 | 1 |
| 430 | 1 | 53 | 1 | 1 | 3 | 1 | 1 |
| 431 | 1 | 67 | 1 | 1 | 3 | 4 | 1 |
| 432 | 1 | 60 | 1 | 1 | 3 | 4 | 1 |
| 433 | 1 | 65 | 1 | 1 | 4 | 1 | 1 |
| 434 | 1 | 46 | 1 | 1 | 3 | 4 | 1 |
| 435 | 1 | 72 | 1 | 1 | 3 | 2 | 1 |
| 436 | 1 | 68 | 1 | 1 | 4 | 4 | 1 |
| 437 | 1 | 39 | 1 | 1 | 4 | 2 | 1 |
| 438 | 1 | 31 | 1 | 1 | 3 | 2 | 1 |
| 439 | 1 | 74 | 1 | 1 | 3 | 1 | 1 |
| 440 | 1 | 61 | 1 | 1 | 4 | 4 | 1 |
| 441 | 1 | 51 | 1 | 1 | 2 | 1 | 1 |
| 442 | 1 | 59 | 1 | 1 | 3 | 2 | 1 |
| 443 | 1 | 80 | 1 | 1 | 4 | 1 | 1 |
| 444 | 1 | 89 | 1 | 1 | 3 | 2 | 1 |
| 445 | 1 | 50 | 1 | 2 | 3 | 4 | 1 |
| 446 | 1 | 62 | 1 | 1 | 3 | 2 | 1 |
| 447 | 1 | 55 | 1 | 1 | 3 | 2 | 1 |
| 448 | 1 | 70 | 1 | 1 | 3 | 1 | 1 |

|     |   |    |   |   |   |   |   |
|-----|---|----|---|---|---|---|---|
| 449 | 1 | 65 | 1 | 1 | 2 | 3 | 1 |
| 450 | 1 | 48 | 1 | 1 | 2 | 3 | 1 |
| 451 | 1 | 44 | 2 | 1 | 2 | 3 | 1 |
| 452 | 1 | 48 | 2 | 1 | 2 | 3 | 1 |
| 453 | 1 | 56 | 2 | 1 | 2 | 3 | 1 |
| 454 | 1 | 48 | 2 | 1 | 1 | 3 | 1 |
| 455 | 1 | 40 | 2 | 1 | 2 | 3 | 1 |
| 456 | 1 | 55 | 2 | 1 | 2 | 3 | 1 |
| 457 | 1 | 40 | 2 | 1 | 2 | 3 | 1 |
| 458 | 1 | 47 | 2 | 1 | 3 | 3 | 1 |
| 459 | 1 | 41 | 2 | 1 | 1 | 3 | 1 |
| 460 | 1 | 52 | 2 | 1 | 2 | 3 | 1 |
| 461 | 1 | 46 | 2 | 1 | 2 | 3 | 1 |
| 462 | 1 | 56 | 2 | 1 | 3 | 3 | 1 |
| 463 | 1 | 39 | 2 | 1 | 2 | 3 | 1 |
| 464 | 1 | 60 | 2 | 1 | 2 | 3 | 1 |
| 465 | 1 | 60 | 2 | 1 | 3 | 3 | 1 |
| 466 | 1 | 41 | 2 | 1 | 3 | 3 | 1 |
| 467 | 1 | 58 | 2 | 1 | 2 | 3 | 1 |
| 468 | 1 | 46 | 2 | 1 | 3 | 3 | 1 |
| 469 | 1 | 59 | 2 | 1 | 4 | 4 | 1 |
| 470 | 1 | 39 | 2 | 1 | 3 | 3 | 1 |
| 471 | 1 | 50 | 2 | 1 | 4 | 4 | 1 |
| 472 | 1 | 59 | 2 | 1 | 2 | 3 | 1 |
| 473 | 1 | 50 | 2 | 1 | 2 | 3 | 1 |
| 474 | 1 | 55 | 2 | 1 | 3 | 3 | 1 |
| 475 | 1 | 67 | 2 | 1 | 3 | 3 | 1 |
| 476 | 1 | 56 | 2 | 1 | 3 | 3 | 1 |
| 477 | 1 | 70 | 2 | 1 | 2 | 2 | 1 |
| 478 | 1 | 70 | 2 | 1 | 1 | 3 | 1 |
| 479 | 1 | 59 | 2 | 1 | 2 | 3 | 1 |
| 480 | 1 | 41 | 2 | 1 | 4 | 4 | 1 |
| 481 | 1 | 50 | 2 | 1 | 2 | 3 | 1 |
| 482 | 1 | 57 | 2 | 1 | 3 | 3 | 1 |
| 483 | 1 | 66 | 2 | 1 | 1 | 3 | 1 |
| 484 | 1 | 43 | 2 | 1 | 2 | 3 | 1 |
| 485 | 1 | 42 | 2 | 1 | 3 | 3 | 1 |
| 486 | 1 | 50 | 2 | 1 | 3 | 3 | 1 |
| 487 | 1 | 66 | 2 | 1 | 2 | 3 | 1 |
| 488 | 1 | 65 | 2 | 1 | 3 | 3 | 1 |
| 489 | 1 | 39 | 2 | 1 | 3 | 3 | 1 |
| 490 | 1 | 60 | 2 | 1 | 3 | 3 | 1 |
| 491 | 1 | 46 | 2 | 1 | 2 | 4 | 1 |
| 492 | 1 | 65 | 2 | 2 | 3 | 3 | 1 |
| 493 | 1 | 45 | 1 | 1 | 3 | 4 | 1 |
| 494 | 1 | 50 | 2 | 1 | 2 | 3 | 1 |
| 495 | 1 | 62 | 2 | 1 | 2 | 3 | 1 |
| 496 | 1 | 55 | 1 | 1 | 4 | 1 | 1 |
| 497 | 1 | 62 | 2 | 1 | 2 | 3 | 1 |
| 498 | 1 | 50 | 1 | 1 | 4 | 1 | 1 |

|     |   |    |   |   |   |   |   |
|-----|---|----|---|---|---|---|---|
| 499 | 1 | 65 | 2 | 1 | 2 | 3 | 1 |
| 500 | 1 | 45 | 2 | 1 | 3 | 3 | 1 |
| 501 | 1 | 58 | 1 | 1 | 3 | 1 | 1 |
| 502 | 1 | 49 | 1 | 1 | 3 | 3 | 1 |
| 503 | 1 | 46 | 2 | 1 | 2 | 3 | 1 |
| 504 | 1 | 37 | 2 | 1 | 2 | 3 | 1 |
| 505 | 1 | 50 | 1 | 1 | 1 | 3 | 1 |
| 506 | 1 | 51 | 2 | 1 | 1 | 2 | 1 |
| 507 | 1 | 43 | 2 | 1 | 4 | 3 | 1 |
| 508 | 1 | 40 | 2 | 1 | 1 | 3 | 1 |
| 509 | 1 | 55 | 2 | 1 | 3 | 3 | 1 |
| 510 | 1 | 48 | 2 | 1 | 4 | 3 | 1 |
| 511 | 1 | 65 | 2 | 1 | 2 | 3 | 1 |
| 512 | 1 | 56 | 2 | 1 | 1 | 3 | 1 |
| 513 | 1 | 50 | 2 | 1 | 3 | 3 | 1 |
| 514 | 1 | 35 | 2 | 1 | 3 | 1 | 1 |
| 515 | 1 | 60 | 2 | 1 | 3 | 3 | 1 |
| 516 | 1 | 53 | 2 | 1 | 3 | 3 | 1 |
| 517 | 1 | 62 | 2 | 1 | 1 | 3 | 1 |
| 518 | 1 | 52 | 2 | 1 | 3 | 3 | 1 |
| 519 | 1 | 63 | 2 | 1 | 2 | 3 | 1 |
| 520 | 1 | 42 | 2 | 1 | 1 | 3 | 1 |
| 521 | 1 | 45 | 2 | 2 | 2 | 3 | 1 |
| 522 | 1 | 50 | 2 | 1 | 1 | 3 | 1 |
| 523 | 1 | 80 | 2 | 1 | 3 | 4 | 1 |
| 524 | 1 | 44 | 2 | 1 | 2 | 3 | 1 |
| 525 | 1 | 72 | 2 | 1 | 2 | 3 | 1 |
| 526 | 1 | 45 | 2 | 1 | 2 | 3 | 1 |
| 527 | 1 | 60 | 2 | 1 | 3 | 3 | 1 |
| 528 | 1 | 50 | 2 | 1 | 1 | 3 | 1 |
| 529 | 1 | 31 | 2 | 1 | 3 | 3 | 1 |
| 530 | 1 | 55 | 2 | 1 | 2 | 3 | 1 |
| 531 | 1 | 50 | 2 | 1 | 2 | 3 | 1 |
| 532 | 1 | 40 | 2 | 1 | 2 | 3 | 1 |
| 533 | 1 | 48 | 2 | 1 | 2 | 3 | 1 |
| 534 | 1 | 42 | 2 | 1 | 1 | 3 | 1 |
| 535 | 1 | 41 | 2 | 1 | 3 | 3 | 1 |
| 536 | 1 | 62 | 2 | 1 | 2 | 3 | 1 |
| 537 | 1 | 50 | 2 | 1 | 2 | 3 | 1 |
| 538 | 1 | 58 | 2 | 1 | 2 | 3 | 1 |
| 539 | 1 | 65 | 2 | 2 | 1 | 3 | 1 |
| 540 | 1 | 56 | 2 | 1 | 2 | 3 | 1 |
| 541 | 1 | 37 | 1 | 1 | 3 | 3 | 1 |
| 542 | 1 | 30 | 2 | 1 | 1 | 3 | 1 |
| 543 | 1 | 55 | 2 | 1 | 2 | 3 | 1 |
| 544 | 1 | 55 | 2 | 1 | 2 | 3 | 1 |
| 545 | 1 | 49 | 1 | 1 | 2 | 3 | 1 |
| 546 | 1 | 33 | 1 | 1 | 3 | 1 | 1 |
| 547 | 1 | 70 | 1 | 1 | 2 | 3 | 1 |
| 548 | 1 | 55 | 2 | 1 | 2 | 3 | 1 |

|     |   |    |   |   |   |   |   |
|-----|---|----|---|---|---|---|---|
| 549 | 1 | 55 | 1 | 1 | 1 | 1 | 1 |
| 550 | 1 | 70 | 1 | 1 | 4 | 1 | 1 |
| 551 | 1 | 60 | 2 | 1 | 2 | 1 | 1 |
| 552 | 1 | 40 | 2 | 1 | 2 | 3 | 1 |
| 553 | 1 | 40 | 1 | 1 | 2 | 3 | 1 |
| 554 | 1 | 16 | 2 | 2 | 2 | 3 | 1 |
| 555 | 1 | 50 | 2 | 1 | 2 | 3 | 1 |
| 556 | 1 | 32 | 2 | 1 | 2 | 3 | 1 |
| 557 | 1 | 29 | 2 | 1 | 1 | 3 | 1 |
| 558 | 1 | 54 | 2 | 1 | 2 | 3 | 1 |
| 559 | 1 | 60 | 1 | 1 | 2 | 2 | 1 |
| 560 | 1 | 40 | 1 | 1 | 4 | 2 | 1 |
| 561 | 1 | 42 | 2 | 1 | 1 | 3 | 1 |
| 562 | 1 | 54 | 2 | 1 | 3 | 3 | 1 |
| 563 | 1 | 42 | 2 | 1 | 2 | 3 | 1 |
| 564 | 1 | 41 | 2 | 1 | 1 | 3 | 1 |
| 565 | 1 | 31 | 2 | 1 | 1 | 3 | 1 |
| 566 | 1 | 70 | 2 | 1 | 3 | 3 | 1 |
| 567 | 1 | 40 | 2 | 1 | 2 | 3 | 1 |
| 568 | 1 | 42 | 2 | 1 | 1 | 3 | 1 |
| 569 | 1 | 92 | 2 | 1 | 2 | 3 | 1 |
| 570 | 1 | 55 | 2 | 1 | 3 | 3 | 1 |
| 571 | 1 | 58 | 2 | 1 | 2 | 3 | 1 |
| 572 | 1 | 56 | 1 | 1 | 2 | 3 | 1 |
| 573 | 1 | 30 | 2 | 1 | 2 | 3 | 1 |
| 574 | 1 | 40 | 2 | 2 | 2 | 3 | 1 |
| 575 | 1 | 35 | 2 | 1 | 1 | 3 | 1 |
| 576 | 1 | 75 | 2 | 1 | 2 | 3 | 1 |
| 577 | 1 | 55 | 2 | 1 | 4 | 3 | 1 |
| 578 | 1 | 50 | 2 | 1 | 1 | 3 | 2 |
| 579 | 1 | 62 | 1 | 1 | 3 | 2 | 1 |
| 580 | 1 | 55 | 2 | 1 | 2 | 3 | 1 |
| 581 | 1 | 52 | 1 | 1 | 4 | 1 | 1 |
| 582 | 1 | 55 | 2 | 1 | 2 | 3 | 1 |
| 583 | 1 | 50 | 2 | 1 | 3 | 1 | 1 |
| 584 | 1 | 81 | 1 | 1 | 3 | 2 | 1 |
| 585 | 1 | 62 | 1 | 1 | 3 | 1 | 1 |
| 586 | 1 | 50 | 1 | 1 | 1 | 3 | 1 |
| 587 | 1 | 45 | 2 | 1 | 1 | 3 | 1 |
| 588 | 1 | 44 | 2 | 1 | 2 | 3 | 1 |
| 589 | 1 | 42 | 1 | 1 | 2 | 1 | 1 |
| 590 | 1 | 55 | 1 | 1 | 2 | 2 | 1 |
| 591 | 1 | 60 | 1 | 1 | 2 | 2 | 1 |
| 592 | 1 | 47 | 1 | 2 | 1 | 3 | 1 |
| 593 | 1 | 45 | 2 | 1 | 2 | 3 | 1 |
| 594 | 1 | 61 | 1 | 1 | 2 | 4 | 1 |
| 595 | 1 | 57 | 2 | 1 | 2 | 3 | 1 |
| 596 | 1 | 30 | 1 | 1 | 2 | 2 | 1 |
| 597 | 1 | 42 | 2 | 1 | 2 | 3 | 1 |
| 598 | 1 | 75 | 2 | 1 | 3 | 3 | 1 |

|     |   |    |   |   |   |   |   |
|-----|---|----|---|---|---|---|---|
| 599 | 1 | 40 | 2 | 2 | 1 | 3 | 1 |
| 600 | 1 | 47 | 1 | 2 | 2 | 2 | 1 |
| 601 | 1 | 47 | 2 | 1 | 2 | 3 | 1 |
| 602 | 1 | 50 | 2 | 1 | 2 | 3 | 1 |
| 603 | 1 | 50 | 1 | 1 | 2 | 1 | 1 |
| 604 | 1 | 63 | 2 | 2 | 2 | 3 | 1 |
| 605 | 1 | 55 | 2 | 1 | 2 | 3 | 1 |
| 606 | 1 | 52 | 2 | 1 | 2 | 3 | 1 |
| 607 | 1 | 40 | 2 | 1 | 3 | 3 | 1 |
| 608 | 1 | 47 | 2 | 1 | 3 | 3 | 1 |
| 609 | 1 | 50 | 2 | 1 | 2 | 3 | 1 |
| 610 | 1 | 55 | 1 | 1 | 2 | 1 | 1 |
| 611 | 1 | 60 | 2 | 1 | 1 | 3 | 1 |
| 612 | 1 | 52 | 2 | 1 | 3 | 2 | 1 |
| 613 | 1 | 51 | 2 | 1 | 2 | 3 | 1 |
| 614 | 1 | 40 | 1 | 1 | 4 | 1 | 1 |
| 615 | 1 | 52 | 1 | 1 | 2 | 2 | 1 |
| 616 | 1 | 40 | 1 | 1 | 2 | 3 | 1 |
| 617 | 1 | 70 | 2 | 1 | 3 | 3 | 1 |
| 618 | 1 | 82 | 2 | 1 | 2 | 3 | 1 |
| 619 | 1 | 40 | 1 | 1 | 1 | 1 | 1 |
| 620 | 1 | 40 | 2 | 1 | 1 | 1 | 1 |
| 621 | 1 | 50 | 2 | 1 | 3 | 1 | 1 |
| 622 | 1 | 50 | 1 | 1 | 1 | 2 | 1 |
| 623 | 1 | 55 | 2 | 1 | 3 | 3 | 1 |
| 624 | 1 | 50 | 1 | 1 | 2 | 2 | 1 |
| 625 | 1 | 81 | 2 | 2 | 2 | 3 | 1 |
| 626 | 1 | 57 | 2 | 1 | 2 | 3 | 1 |
| 627 | 1 | 55 | 2 | 1 | 2 | 3 | 1 |
| 628 | 1 | 55 | 1 | 1 | 4 | 1 | 1 |
| 629 | 1 | 55 | 1 | 1 | 3 | 1 | 1 |
| 630 | 1 | 60 | 2 | 1 | 1 | 3 | 1 |
| 631 | 1 | 55 | 1 | 1 | 3 | 2 | 1 |
| 632 | 1 | 35 | 1 | 1 | 2 | 1 | 1 |
| 633 | 1 | 48 | 2 | 1 | 3 | 3 | 1 |
| 634 | 1 | 66 | 2 | 1 | 1 | 3 | 1 |
| 635 | 1 | 45 | 2 | 1 | 2 | 3 | 1 |
| 636 | 1 | 47 | 1 | 1 | 2 | 1 | 1 |
| 637 | 1 | 48 | 1 | 1 | 2 | 1 | 1 |
| 638 | 1 | 60 | 1 | 1 | 3 | 2 | 1 |
| 639 | 1 | 70 | 2 | 1 | 2 | 3 | 1 |
| 640 | 1 | 60 | 1 | 1 | 2 | 2 | 1 |
| 641 | 2 | 50 | 2 | 2 | 2 | 3 | 1 |
| 642 | 2 | 58 | 2 | 2 | 2 | 3 | 1 |
| 643 | 2 | 65 | 2 | 2 | 3 | 3 | 1 |
| 644 | 2 | 50 | 1 | 1 | 2 | 2 | 1 |
| 645 | 2 | 50 | 2 | 2 | 1 | 3 | 1 |
| 646 | 2 | 52 | 2 | 2 | 1 | 3 | 1 |
| 647 | 2 | 50 | 2 | 2 | 2 | 3 | 1 |
| 648 | 2 | 32 | 2 | 2 | 2 | 3 | 1 |

|     |   |    |   |   |   |   |   |
|-----|---|----|---|---|---|---|---|
| 649 | 2 | 55 | 2 | 2 | 2 | 3 | 1 |
| 650 | 2 | 48 | 2 | 2 | 1 | 3 | 1 |
| 651 | 2 | 50 | 2 | 2 | 3 | 3 | 1 |
| 652 | 2 | 58 | 2 | 2 | 2 | 3 | 1 |
| 653 | 2 | 42 | 2 | 2 | 1 | 3 | 1 |
| 654 | 2 | 32 | 2 | 1 | 3 | 3 | 1 |
| 655 | 2 | 42 | 2 | 1 | 2 | 3 | 1 |
| 656 | 2 | 34 | 2 | 2 | 2 | 3 | 1 |
| 657 | 2 | 60 | 2 | 2 | 1 | 3 | 1 |
| 658 | 2 | 60 | 2 | 1 | 3 | 3 | 1 |
| 659 | 2 | 55 | 2 | 2 | 1 | 3 | 1 |
| 660 | 2 | 50 | 2 | 2 | 1 | 3 | 1 |
| 661 | 2 | 64 | 2 | 2 | 3 | 3 | 1 |
| 662 | 2 | 55 | 2 | 2 | 2 | 3 | 1 |
| 663 | 2 | 39 | 2 | 2 | 2 | 3 | 1 |
| 664 | 2 | 70 | 2 | 2 | 1 | 3 | 1 |
| 665 | 2 | 50 | 2 | 2 | 2 | 3 | 1 |
| 666 | 2 | 54 | 2 | 2 | 3 | 3 | 1 |
| 667 | 2 | 53 | 1 | 2 | 4 | 1 | 1 |
| 668 | 2 | 30 | 1 | 1 | 3 | 1 | 1 |
| 669 | 2 | 50 | 1 | 2 | 2 | 4 | 1 |
| 670 | 2 | 38 | 1 | 1 | 1 | 2 | 1 |
| 671 | 2 | 61 | 1 | 1 | 2 | 1 | 1 |
| 672 | 2 | 52 | 1 | 2 | 3 | 4 | 1 |
| 673 | 2 | 30 | 1 | 2 | 3 | 1 | 1 |
| 674 | 2 | 45 | 1 | 2 | 3 | 4 | 1 |
| 675 | 2 | 38 | 1 | 2 | 3 | 2 | 1 |
| 676 | 2 | 50 | 1 | 2 | 1 | 2 | 1 |
| 677 | 2 | 50 | 1 | 1 | 4 | 2 | 1 |
| 678 | 2 | 55 | 1 | 1 | 2 | 2 | 1 |
| 679 | 2 | 45 | 1 | 1 | 2 | 2 | 1 |
| 680 | 2 | 42 | 1 | 1 | 2 | 2 | 1 |
| 681 | 2 | 45 | 1 | 2 | 1 | 4 | 1 |
| 682 | 2 | 30 | 1 | 2 | 1 | 2 | 1 |
| 683 | 2 | 45 | 1 | 2 | 3 | 4 | 1 |
| 684 | 2 | 50 | 1 | 2 | 2 | 2 | 1 |
| 685 | 2 | 65 | 1 | 1 | 2 | 4 | 1 |
| 686 | 2 | 70 | 1 | 1 | 3 | 1 | 1 |
| 687 | 2 | 50 | 1 | 2 | 1 | 4 | 1 |
| 689 | 2 | 50 | 1 | 1 | 2 | 2 | 1 |
| 690 | 2 | 31 | 1 | 2 | 3 | 2 | 1 |
| 691 | 2 | 62 | 1 | 2 | 4 | 4 | 1 |
| 692 | 2 | 35 | 1 | 2 | 3 | 2 | 1 |
| 693 | 2 | 45 | 1 | 2 | 4 | 2 | 1 |
| 694 | 2 | 35 | 1 | 2 | 3 | 4 | 1 |
| 695 | 2 | 50 | 1 | 2 | 2 | 4 | 1 |
| 696 | 2 | 50 | 1 | 2 | 1 | 4 | 1 |
| 697 | 2 | 59 | 1 | 2 | 2 | 4 | 1 |
| 698 | 2 | 35 | 1 | 1 | 1 | 4 | 1 |
| 699 | 2 | 60 | 1 | 2 | 1 | 4 | 1 |

|     |   |    |   |   |   |   |   |
|-----|---|----|---|---|---|---|---|
| 700 | 2 | 40 | 1 | 1 | 4 | 4 | 1 |
| 701 | 2 | 42 | 1 | 2 | 3 | 1 | 1 |
| 702 | 2 | 48 | 1 | 1 | 3 | 4 | 1 |
| 702 | 2 | 30 | 1 | 1 | 3 | 4 | 1 |
| 703 | 2 | 35 | 1 | 2 | 2 | 2 | 1 |
| 704 | 2 | 50 | 1 | 2 | 4 | 4 | 1 |
| 705 | 2 | 35 | 1 | 2 | 4 | 4 | 1 |
| 706 | 2 | 55 | 1 | 2 | 2 | 2 | 1 |
| 707 | 2 | 46 | 1 | 2 | 3 | 4 | 1 |
| 708 | 2 | 50 | 1 | 2 | 4 | 4 | 1 |
| 709 | 2 | 35 | 1 | 2 | 2 | 2 | 1 |
| 710 | 2 | 52 | 1 | 2 | 2 | 3 | 1 |
| 711 | 2 | 24 | 1 | 2 | 4 | 2 | 1 |
| 712 | 2 | 65 | 1 | 2 | 3 | 4 | 1 |
| 713 | 2 | 40 | 1 | 2 | 3 | 2 | 1 |
| 714 | 2 | 55 | 1 | 1 | 4 | 1 | 1 |
| 715 | 2 | 40 | 1 | 2 | 3 | 4 | 1 |
| 716 | 2 | 45 | 1 | 2 | 4 | 4 | 1 |
| 717 | 2 | 51 | 1 | 2 | 4 | 4 | 1 |
| 718 | 2 | 52 | 1 | 2 | 2 | 4 | 1 |
| 719 | 2 | 40 | 1 | 1 | 4 | 1 | 1 |
| 720 | 2 | 35 | 1 | 1 | 2 | 4 | 1 |
| 721 | 2 | 55 | 1 | 2 | 3 | 4 | 1 |
| 722 | 2 | 65 | 1 | 1 | 4 | 1 | 1 |
| 723 | 2 | 32 | 1 | 2 | 4 | 4 | 1 |
| 724 | 2 | 43 | 1 | 2 | 4 | 1 | 1 |
| 725 | 2 | 30 | 1 | 1 | 1 | 4 | 1 |
| 726 | 2 | 45 | 1 | 2 | 4 | 1 | 1 |
| 727 | 2 | 50 | 1 | 2 | 3 | 4 | 1 |
| 728 | 2 | 60 | 1 | 1 | 3 | 2 | 1 |
| 729 | 2 | 60 | 1 | 1 | 2 | 1 | 1 |
| 730 | 2 | 45 | 1 | 2 | 3 | 2 | 1 |
| 731 | 2 | 50 | 1 | 1 | 3 | 2 | 1 |
| 732 | 2 | 54 | 1 | 1 | 4 | 1 | 1 |
| 733 | 2 | 59 | 1 | 1 | 4 | 2 | 1 |
| 734 | 2 | 80 | 2 | 1 | 2 | 3 | 1 |
| 735 | 2 | 45 | 1 | 2 | 4 | 1 | 1 |
| 736 | 2 | 32 | 1 | 2 | 2 | 1 | 1 |
| 737 | 2 | 62 | 1 | 2 | 2 | 4 | 1 |
| 738 | 2 | 46 | 1 | 2 | 3 | 2 | 1 |
| 739 | 2 | 45 | 1 | 1 | 3 | 2 | 1 |
| 740 | 2 | 40 | 1 | 1 | 2 | 2 | 1 |
| 741 | 2 | 40 | 1 | 2 | 3 | 1 | 1 |
| 742 | 2 | 35 | 1 | 2 | 2 | 4 | 1 |
| 743 | 2 | 58 | 1 | 1 | 3 | 4 | 1 |
| 744 | 2 | 50 | 1 | 1 | 4 | 4 | 1 |
| 745 | 2 | 32 | 1 | 2 | 4 | 1 | 1 |
| 746 | 2 | 49 | 1 | 2 | 3 | 4 | 1 |
| 747 | 2 | 65 | 2 | 1 | 3 | 3 | 1 |
| 748 | 2 | 52 | 2 | 2 | 4 | 3 | 1 |

|     |   |    |   |   |   |   |   |
|-----|---|----|---|---|---|---|---|
| 749 | 2 | 47 | 2 | 1 | 4 | 3 | 1 |
| 750 | 2 | 61 | 2 | 2 | 3 | 3 | 1 |
| 751 | 2 | 48 | 2 | 1 | 4 | 1 | 2 |
| 752 | 2 | 50 | 2 | 1 | 2 | 3 | 1 |
| 753 | 2 | 52 | 2 | 1 | 3 | 1 | 2 |
| 754 | 2 | 30 | 2 | 2 | 2 | 3 | 1 |
| 755 | 2 | 44 | 2 | 1 | 2 | 3 | 1 |
| 756 | 2 | 55 | 2 | 2 | 4 | 3 | 1 |
| 757 | 2 | 70 | 2 | 1 | 4 | 3 | 1 |
| 758 | 2 | 56 | 2 | 1 | 4 | 1 | 1 |
| 759 | 2 | 60 | 2 | 1 | 1 | 3 | 1 |
| 760 | 2 | 50 | 2 | 1 | 3 | 3 | 1 |
| 761 | 2 | 40 | 2 | 2 | 2 | 3 | 1 |
| 762 | 2 | 50 | 2 | 2 | 2 | 3 | 1 |
| 763 | 2 | 31 | 2 | 2 | 2 | 3 | 1 |
| 764 | 2 | 55 | 2 | 1 | 4 | 1 | 1 |
| 765 | 2 | 53 | 2 | 2 | 2 | 3 | 1 |
| 766 | 2 | 60 | 2 | 2 | 1 | 3 | 1 |
| 767 | 2 | 50 | 2 | 2 | 1 | 3 | 1 |
| 768 | 2 | 40 | 2 | 1 | 3 | 3 | 1 |
| 769 | 2 | 32 | 2 | 2 | 1 | 3 | 1 |
| 770 | 2 | 60 | 2 | 1 | 1 | 3 | 1 |
| 771 | 2 | 55 | 2 | 2 | 3 | 3 | 1 |
| 772 | 2 | 53 | 2 | 1 | 2 | 2 | 1 |
| 773 | 2 | 65 | 2 | 1 | 3 | 3 | 1 |
| 774 | 2 | 49 | 2 | 2 | 3 | 3 | 1 |
| 775 | 2 | 57 | 2 | 1 | 2 | 3 | 1 |
| 776 | 2 | 50 | 2 | 1 | 2 | 3 | 1 |
| 777 | 2 | 43 | 2 | 2 | 1 | 3 | 1 |
| 778 | 2 | 30 | 2 | 1 | 3 | 3 | 1 |
| 779 | 2 | 60 | 2 | 2 | 1 | 3 | 1 |
| 780 | 2 | 50 | 2 | 2 | 2 | 3 | 1 |
| 781 | 2 | 55 | 2 | 1 | 2 | 3 | 1 |
| 782 | 2 | 35 | 2 | 2 | 2 | 3 | 1 |
| 783 | 2 | 50 | 2 | 2 | 1 | 3 | 1 |
| 784 | 2 | 37 | 2 | 2 | 2 | 3 | 1 |
| 785 | 2 | 40 | 2 | 2 | 3 | 1 | 1 |
| 786 | 2 | 45 | 2 | 2 | 2 | 3 | 1 |
| 787 | 2 | 37 | 2 | 2 | 4 | 3 | 1 |
| 788 | 2 | 60 | 2 | 2 | 1 | 3 | 1 |
| 789 | 2 | 45 | 2 | 2 | 2 | 3 | 1 |
| 790 | 2 | 55 | 2 | 2 | 4 | 3 | 1 |
| 791 | 2 | 42 | 2 | 2 | 2 | 3 | 1 |
| 792 | 2 | 60 | 2 | 2 | 1 | 3 | 1 |
| 793 | 2 | 71 | 2 | 2 | 1 | 3 | 1 |
| 794 | 2 | 44 | 2 | 1 | 2 | 3 | 1 |
| 795 | 2 | 45 | 2 | 1 | 1 | 3 | 1 |
| 796 | 2 | 56 | 2 | 1 | 3 | 1 | 1 |
| 797 | 2 | 72 | 2 | 2 | 3 | 3 | 1 |
| 798 | 2 | 45 | 2 | 1 | 4 | 1 | 1 |



|     |   |    |   |   |   |   |   |
|-----|---|----|---|---|---|---|---|
| 799 | 2 | 38 | 2 | 1 | 2 | 2 | 1 |
| 800 | 2 | 60 | 2 | 2 | 3 | 3 | 1 |
| 801 | 2 | 46 | 2 | 2 | 2 | 3 | 1 |
| 802 | 2 | 50 | 2 | 2 | 2 | 3 | 1 |
| 803 | 2 | 49 | 2 | 2 | 3 | 3 | 1 |
| 804 | 2 | 45 | 2 | 1 | 3 | 1 | 1 |
| 805 | 2 | 54 | 2 | 2 | 2 | 3 | 1 |
| 806 | 2 | 55 | 2 | 2 | 2 | 3 | 1 |
| 807 | 2 | 60 | 2 | 2 | 2 | 3 | 1 |
| 808 | 2 | 60 | 2 | 1 | 2 | 3 | 1 |
| 809 | 2 | 27 | 2 | 1 | 3 | 3 | 1 |
| 810 | 2 | 61 | 2 | 2 | 2 | 3 | 1 |
| 811 | 2 | 55 | 2 | 2 | 3 | 3 | 1 |
| 812 | 2 | 50 | 2 | 1 | 2 | 1 | 1 |
| 813 | 2 | 35 | 2 | 1 | 3 | 3 | 1 |
| 814 | 2 | 60 | 2 | 2 | 3 | 3 | 1 |
| 815 | 2 | 45 | 2 | 1 | 3 | 3 | 1 |
| 816 | 2 | 60 | 2 | 2 | 1 | 4 | 1 |
| 817 | 2 | 40 | 2 | 2 | 1 | 3 | 1 |
| 818 | 2 | 50 | 2 | 1 | 4 | 1 | 1 |
| 819 | 2 | 55 | 2 | 2 | 2 | 3 | 1 |
| 820 | 2 | 55 | 2 | 2 | 2 | 4 | 1 |
| 821 | 2 | 62 | 2 | 2 | 2 | 3 | 1 |
| 822 | 2 | 55 | 2 | 1 | 1 | 3 | 1 |
| 823 | 2 | 50 | 2 | 2 | 2 | 3 | 1 |
| 824 | 2 | 70 | 2 | 1 | 2 | 3 | 1 |
| 825 | 2 | 65 | 2 | 2 | 2 | 3 | 1 |
| 826 | 2 | 72 | 1 | 2 | 3 | 2 | 1 |
| 827 | 2 | 60 | 1 | 2 | 3 | 4 | 1 |
| 828 | 2 | 45 | 1 | 2 | 3 | 1 | 1 |
| 829 | 2 | 55 | 1 | 2 | 3 | 4 | 1 |
| 830 | 2 | 56 | 1 | 2 | 3 | 2 | 1 |
| 831 | 2 | 40 | 1 | 2 | 2 | 4 | 1 |
| 832 | 2 | 42 | 1 | 2 | 3 | 1 | 1 |
| 833 | 2 | 59 | 2 | 2 | 2 | 3 | 1 |
| 834 | 2 | 42 | 2 | 1 | 3 | 3 | 1 |
| 835 | 2 | 65 | 2 | 1 | 3 | 3 | 1 |
| 836 | 2 | 54 | 2 | 2 | 1 | 3 | 1 |
| 837 | 2 | 52 | 2 | 2 | 2 | 3 | 1 |
| 838 | 2 | 25 | 2 | 2 | 2 | 3 | 1 |
| 839 | 2 | 50 | 2 | 2 | 2 | 3 | 1 |
| 840 | 2 | 45 | 1 | 2 | 2 | 4 | 1 |
| 841 | 2 | 29 | 1 | 2 | 1 | 4 | 1 |
| 842 | 2 | 55 | 1 | 1 | 2 | 4 | 1 |
| 843 | 2 | 55 | 1 | 1 | 2 | 2 | 1 |
| 844 | 2 | 50 | 2 | 2 | 2 | 3 | 1 |
| 845 | 2 | 22 | 1 | 2 | 4 | 2 | 1 |
| 846 | 2 | 45 | 1 | 2 | 2 | 2 | 1 |
| 847 | 2 | 35 | 1 | 2 | 2 | 4 | 2 |
| 848 | 2 | 45 | 1 | 2 | 1 | 4 | 1 |

|     |   |    |   |   |   |   |   |
|-----|---|----|---|---|---|---|---|
| 849 | 2 | 48 | 1 | 2 | 4 | 1 | 1 |
| 850 | 2 | 30 | 1 | 2 | 3 | 1 | 1 |
| 851 | 2 | 40 | 1 | 2 | 2 | 4 | 1 |
| 852 | 2 | 42 | 1 | 2 | 3 | 1 | 1 |
| 853 | 2 | 59 | 1 | 2 | 3 | 2 | 1 |
| 854 | 2 | 92 | 2 | 2 | 2 | 3 | 1 |
| 855 | 2 | 50 | 1 | 2 | 3 | 1 | 1 |
| 856 | 2 | 54 | 1 | 2 | 1 | 4 | 1 |
| 857 | 2 | 27 | 1 | 1 | 1 | 3 | 1 |
| 858 | 2 | 59 | 1 | 2 | 2 | 2 | 1 |
| 859 | 2 | 55 | 1 | 1 | 4 | 1 | 1 |
| 860 | 2 | 48 | 1 | 2 | 4 | 1 | 1 |
| 861 | 2 | 22 | 1 | 2 | 3 | 2 | 1 |
| 862 | 2 | 52 | 1 | 1 | 4 | 4 | 1 |
| 863 | 2 | 35 | 1 | 1 | 3 | 2 | 1 |
| 864 | 2 | 20 | 1 | 1 | 4 | 1 | 1 |
| 865 | 2 | 35 | 1 | 2 | 4 | 1 | 1 |
| 866 | 2 | 58 | 1 | 2 | 2 | 4 | 1 |
| 867 | 2 | 49 | 1 | 2 | 4 | 1 | 1 |
| 868 | 2 | 47 | 1 | 2 | 2 | 4 | 1 |
| 869 | 2 | 58 | 1 | 2 | 4 | 2 | 1 |
| 870 | 2 | 55 | 1 | 2 | 3 | 1 | 1 |
| 871 | 2 | 50 | 1 | 1 | 3 | 4 | 1 |
| 872 | 2 | 60 | 1 | 2 | 1 | 4 | 1 |
| 873 | 2 | 51 | 1 | 2 | 4 | 2 | 1 |
| 874 | 2 | 60 | 1 | 1 | 3 | 4 | 1 |
| 875 | 2 | 59 | 1 | 2 | 1 | 4 | 1 |
| 876 | 2 | 55 | 1 | 2 | 1 | 4 | 1 |
| 877 | 2 | 35 | 1 | 2 | 3 | 1 | 1 |
| 878 | 2 | 48 | 2 | 2 | 2 | 3 | 1 |
| 879 | 2 | 56 | 2 | 2 | 1 | 3 | 1 |
| 880 | 2 | 46 | 2 | 2 | 1 | 4 | 1 |
| 881 | 2 | 45 | 2 | 1 | 2 | 3 | 1 |
| 882 | 2 | 45 | 2 | 1 | 2 | 3 | 1 |
| 883 | 2 | 58 | 2 | 2 | 2 | 3 | 1 |
| 884 | 2 | 73 | 2 | 2 | 2 | 3 | 1 |
| 885 | 2 | 48 | 2 | 2 | 1 | 3 | 1 |
| 886 | 2 | 43 | 2 | 2 | 2 | 3 | 1 |
| 887 | 2 | 45 | 2 | 2 | 2 | 3 | 1 |
| 888 | 2 | 39 | 2 | 2 | 2 | 3 | 1 |
| 889 | 2 | 55 | 2 | 2 | 2 | 3 | 1 |
| 890 | 2 | 55 | 2 | 2 | 2 | 3 | 1 |
| 891 | 2 | 35 | 2 | 2 | 1 | 3 | 1 |
| 892 | 2 | 52 | 2 | 2 | 2 | 3 | 1 |
| 893 | 2 | 30 | 2 | 2 | 2 | 3 | 1 |
| 894 | 2 | 44 | 2 | 2 | 2 | 3 | 1 |
| 895 | 2 | 66 | 2 | 2 | 3 | 3 | 1 |
| 896 | 2 | 59 | 2 | 1 | 2 | 3 | 1 |
| 897 | 2 | 44 | 1 | 2 | 1 | 4 | 1 |
| 898 | 2 | 33 | 2 | 2 | 2 | 3 | 1 |

|     |   |    |   |   |   |   |   |
|-----|---|----|---|---|---|---|---|
| 899 | 2 | 34 | 2 | 2 | 3 | 3 | 1 |
| 900 | 2 | 58 | 2 | 2 | 1 | 3 | 1 |
| 901 | 2 | 54 | 2 | 2 | 2 | 3 | 1 |
| 902 | 2 | 57 | 2 | 2 | 3 | 3 | 1 |
| 903 | 2 | 50 | 2 | 1 | 3 | 3 | 1 |
| 904 | 2 | 46 | 2 | 2 | 3 | 3 | 1 |
| 905 | 2 | 25 | 2 | 2 | 2 | 3 | 1 |
| 906 | 2 | 47 | 2 | 2 | 1 | 3 | 1 |
| 907 | 2 | 55 | 2 | 2 | 2 | 3 | 1 |
| 908 | 2 | 60 | 2 | 1 | 1 | 3 | 1 |
| 909 | 2 | 63 | 2 | 2 | 2 | 3 | 1 |
| 910 | 2 | 52 | 2 | 1 | 2 | 3 | 1 |
| 911 | 2 | 45 | 2 | 2 | 2 | 3 | 1 |
| 912 | 2 | 54 | 2 | 1 | 4 | 1 | 1 |
| 913 | 2 | 36 | 2 | 2 | 2 | 4 | 1 |
| 914 | 2 | 40 | 2 | 2 | 2 | 2 | 1 |
| 915 | 2 | 68 | 2 | 1 | 1 | 3 | 1 |
| 916 | 2 | 58 | 2 | 1 | 1 | 3 | 1 |
| 917 | 2 | 45 | 2 | 2 | 2 | 3 | 1 |
| 918 | 2 | 62 | 2 | 1 | 3 | 4 | 1 |
| 919 | 2 | 40 | 2 | 2 | 2 | 2 | 1 |
| 920 | 2 | 57 | 2 | 1 | 2 | 3 | 1 |
| 921 | 2 | 40 | 2 | 2 | 3 | 3 | 1 |
| 922 | 2 | 45 | 2 | 2 | 1 | 4 | 1 |
| 923 | 2 | 51 | 2 | 2 | 1 | 3 | 1 |
| 924 | 2 | 56 | 2 | 2 | 3 | 3 | 1 |
| 925 | 2 | 35 | 2 | 2 | 1 | 3 | 1 |
| 926 | 2 | 75 | 2 | 2 | 1 | 3 | 1 |
| 927 | 2 | 60 | 2 | 1 | 3 | 1 | 1 |
| 928 | 2 | 56 | 2 | 2 | 2 | 3 | 1 |
| 929 | 2 | 57 | 2 | 2 | 1 | 3 | 1 |
| 930 | 2 | 72 | 2 | 1 | 3 | 1 | 1 |
| 931 | 2 | 56 | 2 | 2 | 2 | 3 | 1 |
| 932 | 2 | 60 | 2 | 2 | 3 | 3 | 1 |
| 933 | 2 | 53 | 2 | 2 | 1 | 3 | 1 |
| 934 | 2 | 40 | 2 | 2 | 1 | 3 | 1 |
| 935 | 2 | 55 | 2 | 2 | 4 | 4 | 1 |
| 936 | 2 | 67 | 2 | 1 | 1 | 3 | 1 |
| 937 | 2 | 50 | 2 | 1 | 1 | 3 | 1 |
| 938 | 2 | 47 | 2 | 1 | 1 | 3 | 1 |
| 939 | 2 | 57 | 2 | 2 | 2 | 3 | 1 |
| 940 | 2 | 27 | 2 | 1 | 4 | 3 | 1 |
| 941 | 2 | 50 | 2 | 2 | 2 | 3 | 1 |
| 942 | 2 | 53 | 2 | 2 | 2 | 3 | 1 |
| 943 | 2 | 45 | 2 | 1 | 3 | 3 | 1 |
| 944 | 2 | 52 | 2 | 2 | 3 | 3 | 1 |
| 945 | 2 | 40 | 2 | 1 | 2 | 3 | 1 |
| 946 | 2 | 47 | 1 | 1 | 3 | 1 | 1 |
| 947 | 2 | 50 | 2 | 2 | 3 | 1 | 1 |
| 948 | 2 | 50 | 2 | 1 | 3 | 1 | 2 |

|     |   |    |   |   |   |   |   |
|-----|---|----|---|---|---|---|---|
| 949 | 2 | 58 | 2 | 1 | 2 | 3 | 1 |
| 950 | 2 | 50 | 2 | 1 | 3 | 1 | 1 |
| 951 | 2 | 32 | 2 | 1 | 3 | 3 | 1 |
| 952 | 2 | 40 | 2 | 1 | 2 | 3 | 1 |
| 953 | 2 | 70 | 2 | 1 | 3 | 1 | 1 |
| 954 | 2 | 50 | 2 | 1 | 3 | 3 | 1 |
| 955 | 2 | 38 | 2 | 1 | 3 | 1 | 1 |
| 956 | 2 | 49 | 2 | 2 | 2 | 3 | 1 |
| 957 | 2 | 55 | 2 | 2 | 2 | 3 | 1 |
| 958 | 2 | 35 | 2 | 2 | 2 | 3 | 1 |
| 959 | 2 | 66 | 2 | 1 | 2 | 3 | 1 |
| 960 | 2 | 57 | 2 | 1 | 3 | 1 | 1 |
| 961 | 2 | 55 | 2 | 2 | 1 | 3 | 1 |
| 962 | 2 | 65 | 2 | 1 | 3 | 1 | 1 |
| 963 | 2 | 55 | 2 | 1 | 2 | 3 | 1 |
| 964 | 2 | 50 | 2 | 2 | 2 | 3 | 1 |
| 965 | 2 | 73 | 2 | 2 | 2 | 3 | 1 |
| 966 | 2 | 59 | 2 | 2 | 3 | 3 | 1 |
| 967 | 2 | 65 | 2 | 1 | 3 | 3 | 1 |
| 968 | 2 | 60 | 2 | 1 | 2 | 3 | 1 |
| 969 | 2 | 50 | 1 | 2 | 3 | 4 | 1 |
| 970 | 2 | 56 | 1 | 2 | 4 | 1 | 1 |
| 971 | 2 | 50 | 1 | 2 | 3 | 2 | 1 |
| 972 | 2 | 75 | 1 | 1 | 3 | 2 | 1 |
| 973 | 2 | 80 | 1 | 2 | 1 | 4 | 1 |
| 974 | 2 | 60 | 1 | 2 | 2 | 4 | 2 |
| 975 | 2 | 78 | 1 | 2 | 3 | 2 | 1 |
| 976 | 2 | 52 | 1 | 1 | 3 | 1 | 1 |
| 977 | 2 | 60 | 1 | 1 | 4 | 1 | 1 |
| 978 | 2 | 51 | 1 | 2 | 1 | 4 | 1 |
| 979 | 2 | 45 | 1 | 2 | 2 | 4 | 1 |
| 980 | 2 | 60 | 1 | 1 | 4 | 4 | 1 |
| 981 | 2 | 45 | 1 | 2 | 3 | 4 | 1 |
| 982 | 2 | 67 | 1 | 2 | 3 | 4 | 1 |
| 983 | 2 | 40 | 1 | 2 | 3 | 1 | 1 |
| 984 | 2 | 63 | 1 | 2 | 3 | 1 | 1 |
| 985 | 2 | 50 | 2 | 1 | 2 | 3 | 1 |
| 986 | 2 | 35 | 2 | 2 | 1 | 3 | 1 |
| 987 | 2 | 47 | 2 | 2 | 2 | 3 | 1 |
| 988 | 2 | 50 | 2 | 2 | 3 | 3 | 1 |
| 989 | 2 | 62 | 2 | 1 | 3 | 1 | 1 |
| 990 | 2 | 62 | 2 | 1 | 2 | 3 | 1 |
| 991 | 2 | 65 | 2 | 2 | 1 | 3 | 1 |
| 992 | 2 | 62 | 2 | 1 | 2 | 3 | 1 |
| 993 | 2 | 66 | 2 | 1 | 3 | 3 | 1 |
| 994 | 2 | 73 | 2 | 1 | 3 | 3 | 1 |
| 995 | 2 | 48 | 2 | 1 | 2 | 3 | 1 |
| 996 | 2 | 50 | 2 | 2 | 3 | 3 | 1 |
| 997 | 2 | 57 | 2 | 1 | 3 | 3 | 1 |
| 998 | 2 | 47 | 2 | 1 | 3 | 3 | 1 |

|      |   |    |   |   |   |   |   |
|------|---|----|---|---|---|---|---|
| 999  | 2 | 55 | 2 | 2 | 2 | 3 | 1 |
| 1000 | 2 | 40 | 2 | 2 | 2 | 3 | 1 |
| 1001 | 2 | 45 | 2 | 2 | 2 | 3 | 1 |
| 1002 | 2 | 62 | 2 | 1 | 4 | 1 | 1 |
| 1003 | 2 | 45 | 2 | 1 | 3 | 3 | 1 |
| 1004 | 2 | 46 | 2 | 1 | 2 | 1 | 1 |
| 1005 | 2 | 55 | 2 | 2 | 1 | 3 | 1 |
| 1006 | 2 | 59 | 2 | 1 | 3 | 3 | 1 |
| 1007 | 2 | 74 | 2 | 1 | 3 | 3 | 1 |
| 1008 | 2 | 60 | 2 | 1 | 3 | 3 | 1 |
| 1009 | 2 | 70 | 2 | 1 | 2 | 3 | 1 |
| 1010 | 2 | 60 | 2 | 2 | 2 | 3 | 1 |
| 1011 | 2 | 63 | 2 | 1 | 3 | 3 | 1 |
| 1012 | 2 | 62 | 2 | 1 | 2 | 3 | 1 |
| 1013 | 2 | 70 | 2 | 1 | 3 | 3 | 1 |
| 1014 | 2 | 43 | 1 | 1 | 3 | 1 | 1 |
| 1015 | 2 | 50 | 1 | 2 | 1 | 2 | 1 |
| 1016 | 2 | 45 | 2 | 2 | 3 | 1 | 1 |
| 1017 | 2 | 63 | 2 | 2 | 3 | 2 | 1 |
| 1018 | 2 | 63 | 1 | 1 | 4 | 1 | 1 |
| 1019 | 2 | 35 | 2 | 2 | 1 | 3 | 1 |
| 1020 | 2 | 60 | 2 | 2 | 2 | 3 | 1 |
| 1021 | 2 | 73 | 2 | 2 | 1 | 3 | 1 |
| 1022 | 2 | 58 | 2 | 2 | 3 | 3 | 1 |
| 1023 | 2 | 40 | 2 | 2 | 3 | 1 | 1 |
| 1024 | 2 | 65 | 2 | 2 | 2 | 3 | 1 |
| 1025 | 2 | 50 | 2 | 2 | 1 | 3 | 1 |
| 1026 | 2 | 45 | 2 | 2 | 2 | 1 | 1 |
| 1027 | 2 | 35 | 2 | 2 | 3 | 1 | 1 |
| 1028 | 2 | 46 | 2 | 2 | 3 | 3 | 1 |
| 1029 | 2 | 63 | 2 | 2 | 1 | 3 | 1 |
| 1030 | 2 | 45 | 2 | 2 | 2 | 1 | 1 |
| 1031 | 2 | 63 | 2 | 2 | 2 | 3 | 1 |
| 1032 | 2 | 45 | 2 | 2 | 1 | 3 | 1 |
| 1033 | 2 | 40 | 2 | 2 | 2 | 3 | 1 |
| 1034 | 2 | 42 | 2 | 2 | 2 | 3 | 1 |
| 1035 | 2 | 61 | 2 | 2 | 2 | 3 | 1 |
| 1036 | 2 | 66 | 2 | 2 | 1 | 3 | 1 |
| 1037 | 2 | 62 | 2 | 2 | 2 | 3 | 1 |
| 1038 | 2 | 60 | 2 | 2 | 2 | 3 | 1 |
| 1039 | 2 | 50 | 2 | 2 | 2 | 3 | 1 |
| 1040 | 2 | 45 | 2 | 2 | 3 | 1 | 1 |
| 1041 | 2 | 45 | 2 | 2 | 2 | 3 | 1 |
| 1042 | 2 | 60 | 2 | 2 | 1 | 3 | 1 |
| 1043 | 2 | 45 | 2 | 1 | 3 | 3 | 1 |
| 1044 | 2 | 60 | 2 | 1 | 3 | 1 | 1 |
| 1045 | 2 | 61 | 2 | 2 | 3 | 3 | 1 |
| 1046 | 2 | 43 | 2 | 1 | 3 | 1 | 1 |
| 1047 | 2 | 69 | 1 | 1 | 4 | 2 | 1 |
| 1048 | 2 | 40 | 2 | 1 | 1 | 3 | 1 |

|      |   |    |   |   |   |   |   |
|------|---|----|---|---|---|---|---|
| 1049 | 2 | 42 | 2 | 1 | 3 | 3 | 1 |
| 1050 | 2 | 62 | 2 | 1 | 3 | 3 | 1 |
| 1051 | 2 | 70 | 2 | 1 | 3 | 3 | 1 |
| 1052 | 2 | 49 | 2 | 1 | 1 | 3 | 1 |
| 1053 | 2 | 58 | 2 | 2 | 1 | 3 | 1 |
| 1054 | 2 | 53 | 2 | 2 | 2 | 3 | 1 |
| 1055 | 2 | 44 | 2 | 1 | 3 | 3 | 1 |
| 1056 | 2 | 40 | 2 | 2 | 2 | 3 | 1 |
| 1057 | 2 | 60 | 2 | 2 | 4 | 1 | 1 |
| 1058 | 2 | 48 | 2 | 1 | 2 | 3 | 1 |
| 1059 | 2 | 56 | 2 | 2 | 1 | 3 | 1 |
| 1060 | 2 | 65 | 2 | 1 | 3 | 3 | 1 |
| 1061 | 2 | 57 | 2 | 1 | 3 | 3 | 1 |
| 1062 | 2 | 70 | 2 | 1 | 1 | 3 | 1 |
| 1063 | 2 | 52 | 2 | 1 | 2 | 3 | 1 |
| 1064 | 2 | 49 | 2 | 2 | 2 | 3 | 1 |
| 1065 | 2 | 60 | 2 | 1 | 1 | 3 | 1 |
| 1066 | 2 | 55 | 2 | 1 | 3 | 1 | 1 |
| 1067 | 2 | 55 | 2 | 1 | 2 | 3 | 1 |
| 1068 | 2 | 93 | 2 | 1 | 3 | 3 | 1 |
| 1069 | 2 | 68 | 2 | 1 | 1 | 3 | 1 |
| 1070 | 2 | 70 | 2 | 2 | 1 | 3 | 1 |
| 1071 | 2 | 60 | 1 | 1 | 3 | 1 | 1 |
| 1072 | 2 | 59 | 1 | 1 | 4 | 1 | 1 |
| 1073 | 2 | 75 | 1 | 1 | 2 | 1 | 1 |
| 1074 | 2 | 80 | 1 | 2 | 3 | 2 | 1 |
| 1075 | 2 | 48 | 1 | 1 | 3 | 1 | 1 |
| 1076 | 2 | 30 | 1 | 1 | 1 | 1 | 1 |
| 1077 | 2 | 44 | 1 | 1 | 4 | 1 | 1 |
| 1078 | 2 | 65 | 1 | 2 | 3 | 1 | 1 |
| 1079 | 2 | 52 | 1 | 1 | 3 | 1 | 1 |
| 1080 | 2 | 47 | 1 | 1 | 2 | 2 | 1 |
| 1081 | 2 | 42 | 1 | 2 | 2 | 4 | 1 |
| 1082 | 2 | 75 | 1 | 1 | 3 | 4 | 1 |
| 1083 | 2 | 50 | 1 | 1 | 2 | 2 | 1 |
| 1084 | 2 | 36 | 1 | 1 | 2 | 1 | 1 |
| 1085 | 2 | 24 | 1 | 2 | 3 | 2 | 1 |
| 1086 | 2 | 47 | 1 | 2 | 4 | 1 | 1 |
| 1087 | 2 | 41 | 1 | 1 | 3 | 1 | 1 |
| 1088 | 2 | 49 | 2 | 1 | 2 | 3 | 1 |
| 1089 | 2 | 35 | 2 | 1 | 1 | 3 | 1 |
| 1090 | 2 | 37 | 2 | 1 | 1 | 3 | 1 |
| 1091 | 2 | 50 | 2 | 1 | 2 | 3 | 1 |
| 1092 | 2 | 50 | 1 | 1 | 3 | 1 | 2 |
| 1093 | 2 | 23 | 1 | 1 | 3 | 4 | 1 |
| 1094 | 2 | 52 | 1 | 1 | 3 | 1 | 1 |
| 1095 | 2 | 30 | 1 | 2 | 1 | 4 | 1 |
| 1096 | 2 | 45 | 2 | 1 | 2 | 3 | 1 |
| 1097 | 2 | 60 | 1 | 2 | 1 | 4 | 1 |
| 1098 | 2 | 42 | 2 | 2 | 1 | 3 | 1 |

|      |   |    |   |   |   |   |   |
|------|---|----|---|---|---|---|---|
| 1099 | 2 | 35 | 2 | 1 | 1 | 3 | 1 |
| 1100 | 2 | 53 | 1 | 1 | 1 | 4 | 1 |
| 1101 | 2 | 70 | 1 | 1 | 3 | 2 | 1 |
| 1102 | 2 | 46 | 2 | 1 | 2 | 3 | 1 |
| 1103 | 2 | 43 | 2 | 2 | 1 | 3 | 1 |
| 1104 | 2 | 49 | 2 | 1 | 2 | 3 | 1 |
| 1105 | 2 | 70 | 1 | 1 | 4 | 1 | 1 |
| 1106 | 2 | 79 | 2 | 1 | 1 | 3 | 1 |
| 1107 | 2 | 25 | 2 | 1 | 3 | 3 | 1 |
| 1108 | 2 | 40 | 1 | 1 | 1 | 4 | 1 |
| 1109 | 2 | 50 | 2 | 1 | 1 | 3 | 1 |
| 1110 | 2 | 30 | 2 | 1 | 1 | 3 | 1 |
| 1111 | 2 | 46 | 1 | 1 | 3 | 2 | 1 |
| 1112 | 2 | 70 | 1 | 2 | 2 | 4 | 1 |
| 1113 | 2 | 35 | 1 | 1 | 4 | 4 | 1 |
| 1114 | 2 | 45 | 1 | 1 | 4 | 1 | 1 |
| 1115 | 2 | 47 | 1 | 1 | 4 | 4 | 1 |
| 1116 | 2 | 65 | 2 | 1 | 1 | 3 | 1 |
| 1117 | 2 | 20 | 2 | 2 | 1 | 3 | 1 |
| 1118 | 2 | 45 | 2 | 2 | 1 | 3 | 1 |
| 1119 | 2 | 55 | 1 | 1 | 1 | 1 | 1 |
| 1120 | 2 | 65 | 2 | 1 | 2 | 3 | 1 |
| 1121 | 2 | 46 | 1 | 1 | 2 | 1 | 1 |
| 1122 | 2 | 45 | 1 | 1 | 4 | 4 | 1 |
| 1123 | 2 | 41 | 1 | 2 | 2 | 2 | 1 |
| 1124 | 2 | 47 | 2 | 2 | 1 | 3 | 1 |
| 1125 | 2 | 55 | 2 | 1 | 2 | 3 | 1 |
| 1126 | 2 | 70 | 2 | 2 | 1 | 3 | 1 |
| 1127 | 2 | 43 | 2 | 1 | 4 | 4 | 1 |
| 1128 | 2 | 55 | 1 | 1 | 3 | 2 | 1 |
| 1129 | 2 | 55 | 2 | 1 | 2 | 3 | 1 |
| 1130 | 2 | 72 | 2 | 1 | 3 | 3 | 1 |
| 1131 | 2 | 40 | 2 | 2 | 1 | 3 | 1 |
| 1132 | 2 | 39 | 1 | 1 | 3 | 1 | 1 |
| 1133 | 2 | 70 | 2 | 1 | 2 | 3 | 1 |
| 1134 | 2 | 50 | 2 | 2 | 1 | 3 | 1 |
| 1135 | 2 | 35 | 1 | 2 | 1 | 4 | 1 |
| 1136 | 2 | 42 | 2 | 1 | 2 | 3 | 1 |
| 1137 | 2 | 50 | 2 | 1 | 4 | 1 | 1 |
| 1138 | 2 | 42 | 2 | 1 | 2 | 3 | 1 |
| 1139 | 2 | 36 | 2 | 2 | 1 | 3 | 1 |
| 1140 | 2 | 55 | 2 | 1 | 1 | 3 | 1 |
| 1141 | 2 | 50 | 1 | 2 | 4 | 1 | 1 |
| 1142 | 2 | 60 | 2 | 1 | 2 | 3 | 1 |
| 1143 | 2 | 45 | 2 | 2 | 2 | 3 | 1 |
| 1144 | 2 | 60 | 1 | 2 | 1 | 4 | 1 |
| 1145 | 2 | 73 | 2 | 2 | 3 | 3 | 1 |
| 1146 | 2 | 90 | 2 | 2 | 2 | 3 | 1 |
| 1147 | 2 | 40 | 2 | 1 | 2 | 3 | 1 |
| 1148 | 2 | 46 | 2 | 1 | 2 | 3 | 1 |

|      |   |    |   |   |   |   |   |
|------|---|----|---|---|---|---|---|
| 1149 | 2 | 56 | 2 | 1 | 1 | 3 | 1 |
| 1150 | 2 | 45 | 2 | 1 | 1 | 3 | 1 |
| 1151 | 2 | 55 | 2 | 1 | 2 | 2 | 1 |
| 1152 | 2 | 42 | 2 | 2 | 2 | 2 | 1 |
| 1153 | 2 | 50 | 2 | 2 | 2 | 3 | 1 |
| 1154 | 2 | 45 | 2 | 2 | 1 | 3 | 1 |
| 1155 | 2 | 42 | 2 | 2 | 2 | 3 | 1 |
| 1156 | 2 | 35 | 2 | 2 | 2 | 3 | 1 |
| 1157 | 2 | 45 | 1 | 2 | 3 | 4 | 1 |
| 1158 | 2 | 42 | 1 | 2 | 4 | 4 | 1 |
| 1159 | 2 | 65 | 2 | 2 | 2 | 3 | 1 |
| 1160 | 2 | 40 | 2 | 2 | 2 | 3 | 1 |
| 1161 | 2 | 55 | 2 | 1 | 1 | 3 | 1 |
| 1162 | 2 | 60 | 1 | 2 | 2 | 2 | 1 |
| 1163 | 2 | 50 | 1 | 2 | 1 | 4 | 1 |
| 1164 | 2 | 47 | 2 | 2 | 1 | 3 | 1 |
| 1165 | 2 | 70 | 1 | 2 | 3 | 4 | 1 |
| 1166 | 2 | 52 | 2 | 1 | 2 | 3 | 1 |
| 1167 | 2 | 40 | 1 | 2 | 3 | 4 | 1 |
| 1168 | 2 | 40 | 2 | 2 | 1 | 3 | 1 |
| 1169 | 2 | 60 | 2 | 2 | 1 | 3 | 1 |
| 1170 | 2 | 46 | 1 | 2 | 4 | 1 | 1 |
| 1171 | 2 | 40 | 1 | 2 | 3 | 4 | 1 |
| 1172 | 2 | 50 | 2 | 1 | 2 | 3 | 1 |
| 1173 | 2 | 50 | 2 | 2 | 1 | 3 | 1 |
| 1174 | 2 | 40 | 2 | 2 | 1 | 3 | 1 |
| 1175 | 2 | 56 | 2 | 1 | 3 | 3 | 1 |
| 1176 | 2 | 60 | 2 | 2 | 2 | 3 | 1 |
| 1177 | 2 | 60 | 1 | 2 | 3 | 2 | 1 |
| 1178 | 2 | 30 | 2 | 2 | 2 | 3 | 1 |
| 1179 | 2 | 40 | 1 | 2 | 3 | 4 | 1 |
| 1180 | 2 | 30 | 2 | 2 | 1 | 3 | 1 |
| 1181 | 2 | 55 | 2 | 2 | 2 | 3 | 1 |
| 1182 | 2 | 60 | 2 | 2 | 1 | 3 | 1 |
| 1183 | 2 | 65 | 2 | 2 | 3 | 3 | 1 |
| 1184 | 2 | 41 | 2 | 2 | 1 | 3 | 1 |
| 1185 | 2 | 60 | 2 | 2 | 2 | 3 | 1 |
| 1186 | 2 | 30 | 2 | 2 | 1 | 3 | 1 |
| 1187 | 2 | 35 | 2 | 2 | 1 | 3 | 1 |
| 1188 | 2 | 56 | 2 | 2 | 1 | 3 | 1 |
| 1189 | 2 | 56 | 2 | 2 | 1 | 3 | 1 |
| 1190 | 2 | 72 | 1 | 2 | 2 | 1 | 1 |
| 1191 | 2 | 65 | 1 | 2 | 3 | 2 | 1 |
| 1192 | 2 | 54 | 1 | 2 | 3 | 1 | 1 |
| 1193 | 2 | 55 | 1 | 2 | 2 | 1 | 1 |
| 1194 | 2 | 45 | 2 | 2 | 2 | 4 | 1 |
| 1195 | 2 | 45 | 1 | 1 | 4 | 1 | 1 |
| 1196 | 2 | 63 | 2 | 2 | 2 | 3 | 1 |
| 1197 | 2 | 70 | 2 | 2 | 1 | 3 | 1 |
| 1198 | 2 | 68 | 2 | 2 | 1 | 3 | 1 |



---

|      |   |    |   |   |   |   |   |
|------|---|----|---|---|---|---|---|
| 1199 | 2 | 37 | 1 | 1 | 3 | 4 | 1 |
| 1200 | 2 | 59 | 2 | 1 | 2 | 4 | 1 |

| Q8_fam_inc | BMI       | Q18_dur_DM | Insulin_user |
|------------|-----------|------------|--------------|
| 20000      | 22.222222 | 8          | 2            |
| 5000       | 26.254988 | 2          | 2            |
| 15000      | 25.631167 | 8          | 2            |
| 35000      | 23.555556 | 12         | 2            |
| 10000      | 26.575379 | 15         | 1            |
| 20000      | 23.555556 | 11         | 1            |
| 40000      | 24.863952 | 1          | 2            |
| 50000      | 31.739734 | 6          | 1            |
| 20000      | 24        | 20         | 2            |
| 50000      | 29.174885 | 19         | 1            |
| 20000      | 22.213678 | 11         | 2            |
| 10000      | 22.370343 | 3          | 2            |
| 30000      | 23.828125 | 7          | 2            |
| 60000      | 23.111111 | 14         | 1            |
| 6000       | 36.212279 | 8          | 2            |
| 100000     | 23.555556 | 14         | 1            |
| 15000      | 26.365603 | 13         | 2            |
| 6000       | 21.484375 | 8          | 2            |
| 65000      | 25.910684 | 10         | 2            |
| 100000     | 24.767566 | 2          | 2            |
| 10000      | 25        | 8          | 2            |
| 6000       | 23.804801 | 3          | 1            |
| 20000      | 25.711662 | 15         | 2            |
| 35000      | 23.739956 | 7          | 2            |
| 3000       | 20.808561 | 8          | 2            |
| 8000       | 22.038567 | 2          | 2            |
| 15000      | 24.386526 | 6          | 1            |
| 30000      | 26.128611 | 7          | 2            |
| 15000      | 22.30815  | 15         | 1            |
| 15000      | 23.91883  | 3          | 2            |
| 20000      | 24.973985 | 15         | 1            |
| 30000      | 25.81663  | 5          | 2            |
| 15000      | 26.159334 | 19         | 1            |
| 30000      | 25.039919 | 13         | 2            |
| 20000      | 20.177149 | 15         | 1            |
| 4000       | 24.382373 | 5          | 2            |
| 500000     | 19.003908 | 3          | 2            |
| 22000      | 28.999307 | 12         | 1            |
| 30000      | 24.141519 | 7          | 1            |
| 40000      | 28.577961 | 12         | 1            |
| 750000     | 23.111111 | 11         | 1            |
| 6000       | 22.10029  | 12         | 1            |
| 2000       | 25.711662 | 10         | 2            |
| 7000       | 25.910684 | 5          | 2            |
| 30000      | 25.631167 | 2          | 2            |
| 90000      | 19.959355 | 17         | 1            |
| 35000      | 24.538965 | 21         | 1            |
| 35000      | 24.973985 | 16         | 1            |

|        |           |    |   |
|--------|-----------|----|---|
| 50000  | 28.959    | 12 | 2 |
| 20000  | 25.452358 | 6  | 2 |
| 40000  | 28.515625 | 11 | 1 |
| 20000  | 32.889189 | 7  | 2 |
| 40000  | 26.573129 | 6  | 2 |
| 20000  | 23.555556 | 14 | 1 |
| 70000  | 26.365603 | 7  | 2 |
| 90000  | 23.4375   | 15 | 2 |
| 5000   | 22.031726 | 26 | 1 |
| 40000  | 27.111111 | 23 | 2 |
| 15000  | 21.875    | 24 | 2 |
| 12000  | 29.384757 | 5  | 2 |
| 50000  | 30.078125 | 3  | 2 |
| 65000  | 22.038567 | 9  | 1 |
| 100000 | 27.915519 | 10 | 2 |
| 60000  | 24.21875  | 20 | 2 |
| 10000  | 17.990153 | 25 | 1 |
| 20000  | 27.34375  | 5  | 2 |
| 100000 | 32.466181 | 20 | 2 |
| 35000  | 24.005487 | 3  | 2 |
| 7000   | 24.524346 | 8  | 2 |
| 20000  | 26.297578 | 25 | 2 |
| 5000   | 24.394821 | 1  | 2 |
| 30000  | 24.796667 | 1  | 1 |
| 30000  | 23.111111 | 10 | 1 |
| 35000  | 37.530494 | 1  | 2 |
| 50000  | 22.222222 | 3  | 2 |
| 30000  | 23.111111 | 1  | 2 |
| 30000  | 24.646648 | 12 | 2 |
| 20000  | 30.297784 | 10 | 2 |
| 25000  | 27.848795 | 10 | 1 |
| 30000  | 22.826881 | 10 | 1 |
| 15000  | 25.510204 | 12 | 2 |
| 10000  | 25.78125  | 1  | 2 |
| 100000 | 28.068944 | 5  | 2 |
| 20000  | 22.0741   | 15 | 2 |
| 30000  | 23.422368 | 3  | 2 |
| 5000   | 28.934069 | 6  | 2 |
| 6000   | 21.641274 | 2  | 2 |
| 100000 | 26.171875 | 8  | 2 |
| 60000  | 29.357522 | 5  | 2 |
| 20000  | 27.209608 | 2  | 2 |
| 5000   | 25.566107 | 5  | 2 |
| 12000  | 23.804801 | 5  | 2 |
| 50000  | 24.005487 | 10 | 1 |
| 40000  | 23.739956 | 16 | 1 |
| 70000  | 29.086132 | 5  | 2 |
| 25000  | 25.910684 | 8  | 2 |
| 50000  | 17.777778 | 1  | 2 |
| 40000  | 24.304618 | 1  | 2 |

|        |           |    |   |
|--------|-----------|----|---|
| 25000  | 25.510204 | 1  | 2 |
| 15000  | 24.973985 | 6  | 2 |
| 70000  | 28.981143 | 2  | 1 |
| 15000  | 28.30385  | 19 | 1 |
| 10000  | 27.209608 | 2  | 2 |
| 8000   | 27.766209 | 5  | 2 |
| 30000  | 20.342798 | 4  | 2 |
| 10000  | 27.993022 | 7  | 2 |
| 40000  | 23.233456 | 2  | 2 |
| 15000  | 26.271345 | 2  | 2 |
| 10000  | 19.436346 | 5  | 2 |
| 20000  | 28.068944 | 20 | 1 |
| 40000  | 25.674519 | 8  | 2 |
| 10000  | 32.894737 | 14 | 1 |
| 7000   | 29.674945 | 2  | 2 |
| 40000  | 32.51821  | 7  | 2 |
| 60000  | 26.83518  | 3  | 2 |
| 40000  | 27.700831 | 15 | 2 |
| 30000  | 24.835763 | 3  | 2 |
| 30000  | 24.767566 | 19 | 1 |
| 30000  | 24.653031 | 20 | 1 |
| 30000  | 25.203981 | 12 | 2 |
| 10000  | 29.341288 | 2  | 2 |
| 25000  | 27.555556 | 10 | 1 |
| 20000  | 24        | 5  | 1 |
| 22000  | 23.422091 | 20 | 2 |
| 20000  | 26.402355 | 16 | 1 |
| 20000  | 29.432133 | 2  | 2 |
| 30000  | 25.558846 | 8  | 2 |
| 100000 | 22.939751 | 14 | 2 |
| 80000  | 29.086132 | 3  | 2 |
| 5000   | 24.21875  | 4  | 2 |
| 12000  | 21.367521 | 15 | 1 |
| 10000  | 29.515939 | 6  | 2 |
| 5000   | 18.75     | 1  | 2 |
| 25000  | 22.0741   | 2  | 2 |
| 20000  | 33.284024 | 10 | 2 |
| 30000  | 26.83518  | 17 | 2 |
| 50000  | 21.110903 | 5  | 2 |
| 30000  | 26.222685 | 20 | 1 |
| 100000 | 30.493526 | 9  | 2 |
| 50000  | 27.555556 | 17 | 2 |
| 25000  | 27.18163  | 6  | 2 |
| 28000  | 27.006173 | 5  | 2 |
| 20000  | 26.037494 | 10 | 2 |
| 8000   | 24        | 2  | 2 |
| 30000  | 28.76187  | 16 | 2 |
| 15000  | 23.833005 | 1  | 2 |
| 25000  | 23.833005 | 1  | 2 |
| 8000   | 23.805402 | 15 | 2 |

|        |           |    |   |
|--------|-----------|----|---|
| 30000  | 22.89282  | 5  | 1 |
| 25000  | 32        | 4  | 2 |
| 15000  | 23.875115 | 1  | 2 |
| 7000   | 29.094282 | 5  | 2 |
| 100000 | 26.298488 | 18 | 2 |
| 13000  | 29.417438 | 17 | 2 |
| 30000  | 22.506925 | 6  | 2 |
| 25000  | 24.314124 | 5  | 2 |
| 30000  | 28.133657 | 17 | 2 |
| 20000  | 33.777778 | 1  | 2 |
| 15000  | 30.131483 | 5  | 2 |
| 7000   | 31.079681 | 1  | 2 |
| 20000  | 24.747454 | 8  | 2 |
| 60000  | 23.805402 | 5  | 2 |
| 30000  | 20.444444 | 1  | 2 |
| 60000  | 29.864958 | 1  | 2 |
| 40000  | 23.612751 | 9  | 2 |
| 20000  | 28.76187  | 7  | 1 |
| 50000  | 33.732501 | 4  | 2 |
| 20000  | 31.900919 | 9  | 1 |
| 5000   | 23.951227 | 12 | 2 |
| 30000  | 21.208449 | 9  | 2 |
| 50000  | 28.888889 | 1  | 2 |
| 7000   | 29.260067 | 25 | 2 |
| 30000  | 33.327562 | 16 | 2 |
| 13000  | 31.501096 | 7  | 2 |
| 30000  | 21.338211 | 3  | 2 |
| 20000  | 25.109569 | 8  | 2 |
| 20000  | 22.183642 | 16 | 2 |
| 60000  | 28.888889 | 10 | 2 |
| 25000  | 20.700817 | 11 | 2 |
| 30000  | 22.679952 | 12 | 2 |
| 30000  | 25.536704 | 30 | 2 |
| 40000  | 27.293224 | 8  | 2 |
| 30000  | 26.953125 | 2  | 2 |
| 30000  | 27.555556 | 7  | 2 |
| 115000 | 23.922423 | 22 | 2 |
| 12000  | 21.219136 | 1  | 2 |
| 30000  | 28        | 8  | 2 |
| 25000  | 25.536704 | 25 | 2 |
| 60000  | 25.802214 | 17 | 2 |
| 50000  | 34.293553 | 2  | 1 |
| 15000  | 25.536704 | 6  | 2 |
| 60000  | 26.666667 | 5  | 2 |
| 50000  | 24.654832 | 12 | 2 |
| 70000  | 32.87311  | 9  | 1 |
| 55000  | 29.777778 | 4  | 2 |
| 15000  | 32.466145 | 7  | 2 |
| 30000  | 32.297866 | 5  | 2 |
| 35000  | 24.386526 | 4  | 2 |

|        |           |    |   |
|--------|-----------|----|---|
| 20000  | 33.327562 | 1  | 2 |
| 30000  | 21.641274 | 8  | 1 |
| 20000  | 25.333333 | 6  | 2 |
| 75000  | 26.479182 | 5  | 2 |
| 10000  | 30.297784 | 1  | 2 |
| 200000 | 24.557752 | 5  | 2 |
| 30000  | 29.27796  | 20 | 2 |
| 35000  | 21.631149 | 3  | 1 |
| 20000  | 23.805402 | 3  | 2 |
| 20000  | 24.034407 | 8  | 1 |
| 30000  | 24.034407 | 5  | 1 |
| 5000   | 27.110583 | 4  | 1 |
| 40000  | 25.148605 | 3  | 2 |
| 50000  | 28.763971 | 1  | 2 |
| 50000  | 21.564545 | 1  | 2 |
| 50000  | 23.875115 | 15 | 2 |
| 35000  | 23.79536  | 2  | 1 |
| 40000  | 26.953125 | 1  | 2 |
| 15000  | 32.8125   | 12 | 1 |
| 200000 | 22.340297 | 1  | 2 |
| 100000 | 26.953125 | 10 | 1 |
| 30000  | 22.265625 | 5  | 1 |
| 50000  | 20.68515  | 11 | 2 |
| 20000  | 28.049671 | 1  | 2 |
| 10000  | 25.536704 | 15 | 1 |
| 40000  | 26.709402 | 16 | 1 |
| 6000   | 26.666667 | 20 | 1 |
| 10000  | 23.225432 | 1  | 2 |
| 20000  | 26.573129 | 1  | 2 |
| 30000  | 22.031726 | 1  | 2 |
| 10000  | 26.672763 | 3  | 2 |
| 30000  | 30.078125 | 1  | 2 |
| 35000  | 26.171875 | 4  | 2 |
| 30000  | 25.689562 | 12 | 2 |
| 20000  | 22.30815  | 3  | 2 |
| 30000  | 24.508946 | 4  | 2 |
| 20000  | 21.875    | 3  | 2 |
| 10000  | 26.438071 | 3  | 2 |
| 15000  | 26.171875 | 10 | 2 |
| 16000  | 18.552876 | 22 | 2 |
| 25000  | 25.390625 | 7  | 2 |
| 90000  | 25.631167 | 14 | 2 |
| 5000   | 25.039919 | 4  | 2 |
| 40000  | 21.564545 | 3  | 2 |
| 60000  | 21.192742 | 8  | 2 |
| 30000  | 29.320988 | 10 | 2 |
| 40000  | 26.83518  | 5  | 2 |
| 20000  | 27.005131 | 8  | 1 |
| 30000  | 25.402816 | 2  | 2 |
| 50000  | 25.039919 | 15 | 2 |

|        |           |    |   |
|--------|-----------|----|---|
| 50000  | 23.805402 | 3  | 2 |
| 9000   | 24.034407 | 8  | 1 |
| 20000  | 24.034407 | 5  | 1 |
| 90000  | 27.110583 | 4  | 1 |
| 20000  | 25.148605 | 3  | 2 |
| 40000  | 28.763971 | 1  | 2 |
| 30000  | 21.564545 | 1  | 2 |
| 20000  | 23.875115 | 15 | 2 |
| 30000  | 23.79536  | 2  | 1 |
| 20000  | 26.953125 | 1  | 2 |
| 45000  | 32.8125   | 12 | 1 |
| 50000  | 24.034407 | 8  | 1 |
| 2000   | 24.034407 | 5  | 1 |
| 20000  | 27.110583 | 4  | 1 |
| 200000 | 25.148605 | 3  | 2 |
| 20000  | 28.763971 | 1  | 2 |
| 50000  | 21.564545 | 1  | 2 |
| 40000  | 23.875115 | 15 | 2 |
| 20000  | 23.79536  | 2  | 1 |
| 5000   | 26.953125 | 1  | 2 |
| 20000  | 32.8125   | 12 | 2 |
| 30000  | 22.340297 | 1  | 2 |
| 20000  | 26.638918 | 4  | 1 |
| 10000  | 32.888889 | 10 | 1 |
| 30000  | 22.151023 | 3  | 2 |
| 10000  | 23.29072  | 4  | 2 |
| 35000  | 24.594907 | 10 | 2 |
| 30000  | 30.297784 | 15 | 1 |
| 20000  | 21.218317 | 4  | 1 |
| 30000  | 30.222222 | 4  | 1 |
| 20000  | 22.94213  | 3  | 2 |
| 5000   | 32.089436 | 12 | 1 |
| 10000  | 28.999307 | 10 | 2 |
| 20000  | 27.970679 | 8  | 2 |
| 50000  | 24.141519 | 4  | 1 |
| 30000  | 29.333333 | 7  | 1 |
| 10000  | 24.141519 | 6  | 2 |
| 15000  | 23.29072  | 4  | 2 |
| 30000  | 24.594907 | 10 | 2 |
| 35000  | 25.333333 | 6  | 2 |
| 30000  | 26.479182 | 5  | 2 |
| 15000  | 30.297784 | 1  | 2 |
| 20000  | 24.557752 | 5  | 2 |
| 30000  | 29.27796  | 20 | 1 |
| 20000  | 21.631149 | 3  | 1 |
| 10000  | 23.805402 | 3  | 2 |
| 2000   | 24.034407 | 8  | 1 |
| 15000  | 27.829314 | 7  | 2 |
| 10000  | 27.110583 | 4  | 1 |
| 3000   | 25.148605 | 3  | 2 |

|        |           |    |   |
|--------|-----------|----|---|
| 15000  | 28.763971 | 1  | 2 |
| 15000  | 18.961927 | 15 | 1 |
| 20000  | 27.407657 | 3  | 2 |
| 10000  | 21.367521 | 1  | 2 |
| 5000   | 24.609375 | 2  | 2 |
| 10000  | 27.815882 | 3  | 1 |
| 20000  | 26.041667 | 10 | 1 |
| 20000  | 22.640865 | 4  | 2 |
| 10000  | 25.390219 | 1  | 2 |
| 10000  | 42.344045 | 6  | 1 |
| 100000 | 24.654832 | 10 | 1 |
| 20000  | 24.112654 | 2  | 2 |
| 20000  | 24.243918 | 7  | 1 |
| 10000  | 24.394821 | 5  | 2 |
| 20000  | 27.239224 | 4  | 2 |
| 15000  | 28.452932 | 6  | 2 |
| 5000   | 26.040052 | 1  | 2 |
| 10000  | 19.723866 | 6  | 2 |
| 2000   | 26.52392  | 3  | 2 |
| 10000  | 21.913806 | 6  | 1 |
| 100000 | 24.243918 | 3  | 2 |
| 10000  | 28.452932 | 14 | 1 |
| 20000  | 28.3771   | 24 | 2 |
| 30000  | 28.617001 | 2  | 2 |
| 50000  | 27.19179  | 6  | 2 |
| 20000  | 25.878578 | 1  | 2 |
| 3000   | 31.346451 | 1  | 2 |
| 10000  | 34.722222 | 10 | 2 |
| 40000  | 23.833005 | 14 | 2 |
| 6000   | 29.899691 | 12 | 1 |
| 10000  | 24.677021 | 11 | 1 |
| 20000  | 29.27796  | 9  | 2 |
| 40000  | 18.025957 | 1  | 2 |
| 5000   | 25.155896 | 16 | 2 |
| 10000  | 25.333333 | 1  | 2 |
| 30000  | 23.828125 | 2  | 2 |
| 35000  | 29.333333 | 1  | 2 |
| 50000  | 23.337684 | 6  | 1 |
| 40000  | 32.71862  | 5  | 1 |
| 10000  | 22.600263 | 4  | 1 |
| 12000  | 24.03461  | 2  | 2 |
| 10000  | 24.034407 | 1  | 2 |
| 30000  | 34.319527 | 1  | 1 |
| 10000  | 28.672626 | 16 | 1 |
| 25000  | 28.935185 | 8  | 1 |
| 10000  | 32.310957 | 15 | 2 |
| 12000  | 23.046875 | 18 | 1 |
| 50000  | 24.221453 | 2  | 2 |
| 50000  | 20.957171 | 1  | 2 |
| 20000  | 23.624447 | 4  | 1 |



|        |           |    |   |
|--------|-----------|----|---|
| 300000 | 30.381944 | 10 | 2 |
| 30000  | 32.467532 | 2  | 2 |
| 15000  | 18.365473 | 5  | 2 |
| 5000   | 23.30668  | 10 | 1 |
| 20000  | 23.875433 | 20 | 2 |
| 40000  | 23.875115 | 1  | 1 |
| 20000  | 24.910767 | 9  | 1 |
| 5000   | 21.926126 | 7  | 1 |
| 40000  | 37.105751 | 18 | 1 |
| 5000   | 30.483379 | 5  | 2 |
| 10000  | 25.876058 | 15 | 2 |
| 10000  | 23.191095 | 17 | 1 |
| 15000  | 31.555556 | 3  | 2 |
| 30000  | 27.630367 | 20 | 1 |
| 10000  | 24.141519 | 13 | 2 |
| 4000   | 29.081633 | 1  | 2 |
| 7000   | 32.466181 | 3  | 1 |
| 5000   | 30.131483 | 10 | 2 |
| 10000  | 34.244991 | 8  | 1 |
| 40000  | 32.049948 | 3  | 2 |
| 25000  | 27.887617 | 8  | 2 |
| 50000  | 27.766209 | 8  | 1 |
| 20000  | 22.222222 | 1  | 2 |
| 15000  | 22.65625  | 3  | 2 |
| 150000 | 27.887617 | 8  | 2 |
| 20000  | 43.671056 | 13 | 1 |
| 10000  | 30.297784 | 11 | 2 |
| 40000  | 28.133657 | 8  | 2 |
| 10000  | 24.141519 | 13 | 2 |
| 40000  | 28.935185 | 20 | 1 |
| 25000  | 29.488704 | 7  | 2 |
| 5000   | 29.136316 | 25 | 1 |
| 20000  | 23.805402 | 9  | 2 |
| 20000  | 34.244991 | 8  | 1 |
| 16000  | 30.080059 | 1  | 1 |
| 16000  | 21.096191 | 2  | 2 |
| 50000  | 23.805402 | 2  | 1 |
| 22000  | 28.040378 | 30 | 1 |
| 50000  | 25.224089 | 1  | 1 |
| 18000  | 29.591837 | 10 | 1 |
| 200000 | 26.037494 | 15 | 2 |
| 50000  | 24.913495 | 22 | 1 |
| 5000   | 26.122449 | 12 | 1 |
| 2000   | 28.69898  | 8  | 2 |
| 50000  | 22.038567 | 14 | 1 |
| 25000  | 28.30385  | 7  | 2 |
| 50000  | 24.609734 | 3  | 2 |
| 75000  | 26.397977 | 1  | 2 |
| 10000  | 24.913495 | 34 | 2 |
| 50000  | 23.4375   | 21 | 1 |

|        |           |    |   |
|--------|-----------|----|---|
| 80000  | 22.265625 | 18 | 2 |
| 30000  | 20.079601 | 10 | 1 |
| 12000  | 24.341758 | 4  | 2 |
| 50000  | 23.30668  | 3  | 1 |
| 5000   | 27.239224 | 5  | 1 |
| 100000 | 24.005487 | 1  | 2 |
| 50000  | 22.516308 | 8  | 1 |
| 15000  | 23.337684 | 4  | 2 |
| 50000  | 27.915519 | 5  | 1 |
| 20000  | 19.834711 | 8  | 2 |
| 80000  | 27.250887 | 8  | 1 |
| 400000 | 24.304618 | 3  | 1 |
| 40000  | 26.314635 | 1  | 1 |
| 20000  | 23.309053 | 12 | 2 |
| 50000  | 27.303438 | 1  | 2 |
| 28000  | 27.276334 | 4  | 2 |
| 40000  | 27.055151 | 4  | 2 |
| 5000   | 30.58802  | 1  | 2 |
| 10000  | 23.804801 | 4  | 2 |
| 90000  | 27.111111 | 3  | 2 |
| 50000  | 24.238227 | 4  | 1 |
| 35000  | 21.580034 | 4  | 2 |
| 31000  | 31.866825 | 14 | 1 |
| 20000  | 26.397977 | 22 | 2 |
| 25000  | 26.402355 | 3  | 1 |
| 80000  | 25.654372 | 15 | 1 |
| 15000  | 21.218317 | 2  | 2 |
| 30000  | 28.90625  | 19 | 2 |
| 40000  | 33.59375  | 1  | 2 |
| 35000  | 25.864512 | 15 | 2 |
| 20000  | 25.78125  | 8  | 2 |
| 50000  | 23.12467  | 8  | 2 |
| 50000  | 22.212967 | 7  | 2 |
| 50000  | 22.476587 | 13 | 2 |
| 22000  | 25.711662 | 0  | 2 |
| 20000  | 20.86112  | 20 | 1 |
| 50000  | 22.83737  | 5  | 2 |
| 10000  | 21.513859 | 6  | 2 |
| 30000  | 25.636917 | 2  | 2 |
| 20000  | 23.233456 | 3  | 1 |
| 10000  | 23.738662 | 7  | 2 |
| 65000  | 25.529645 | 12 | 2 |
| 20000  | 30.42185  | 5  | 2 |
| 5000   | 25        | 1  | 2 |
| 15000  | 20.957171 | 11 | 1 |
| 20000  | 27.639801 | 14 | 2 |
| 5000   | 24.973985 | 13 | 2 |
| 50000  | 29.402273 | 2  | 2 |
| 40000  | 23.875115 | 11 | 1 |
| 15000  | 20.79673  | 10 | 2 |

|        |           |    |   |
|--------|-----------|----|---|
| 12000  | 24.654832 | 5  | 1 |
| 50000  | 24.444444 | 7  | 2 |
| 50000  | 22.370343 | 4  | 2 |
| 20000  | 22.0741   | 20 | 1 |
| 4000   | 32        | 1  | 2 |
| 10000  | 27.705259 | 2  | 2 |
| 50000  | 25.076193 | 11 | 2 |
| 25000  | 21.50447  | 2  | 1 |
| 15000  | 23.456558 | 6  | 1 |
| 30000  | 27.209608 | 11 | 2 |
| 20000  | 29.515939 | 14 | 1 |
| 7000   | 33.747704 | 3  | 1 |
| 15000  | 32.731601 | 1  | 2 |
| 100000 | 27.678739 | 9  | 1 |
| 20000  | 23.068051 | 6  | 1 |
| 140000 | 27.19179  | 10 | 1 |
| 40000  | 26.775934 | 3  | 2 |
| 17000  | 27.678739 | 3  | 2 |
| 27000  | 20.829201 | 7  | 1 |
| 20000  | 26.022644 | 9  | 1 |
| 100000 | 27.111111 | 3  | 2 |
| 25000  | 24.671053 | 6  | 2 |
| 22000  | 24.196494 | 13 | 1 |
| 50000  | 30.747867 | 3  | 2 |
| 15000  | 30.63043  | 4  | 1 |
| 30000  | 18.986591 | 10 | 1 |
| 100000 | 24.141519 | 4  | 1 |
| 35000  | 26.93572  | 15 | 1 |
| 20000  | 33.227534 | 1  | 1 |
| 25000  | 24.526818 | 9  | 1 |
| 10000  | 45.880092 | 2  | 1 |
| 12000  | 28.25097  | 12 | 1 |
| 20000  | 33.694938 | 2  | 1 |
| 25000  | 23.612751 | 6  | 1 |
| 40000  | 17.258383 | 5  | 1 |
| 100000 | 17.301038 | 1  | 2 |
| 12000  | 32.839182 | 6  | 1 |
| 5000   | 25.299376 | 9  | 1 |
| 200000 | 32.310957 | 2  | 2 |
| 20000  | 21.641274 | 2  | 2 |
| 30000  | 21.580034 | 6  | 1 |
| 20000  | 28.935185 | 4  | 1 |
| 10000  | 27.276334 | 5  | 1 |
| 7000   | 27.970679 | 5  | 1 |
| 18000  | 26.912726 | 8  | 1 |
| 20000  | 34.435262 | 2  | 1 |
| 30000  | 28.133657 | 4  | 1 |
| 20000  | 23.191095 | 1  | 1 |
| 50000  | 26.271345 | 10 | 1 |
| 10000  | 30.110279 | 14 | 2 |

|        |           |    |   |
|--------|-----------|----|---|
| 35000  | 29.269972 | 12 | 1 |
| 50000  | 32.454717 | 1  | 1 |
| 15000  | 30.801249 | 9  | 2 |
| 150000 | 27.555556 | 1  | 2 |
| 10000  | 31.297374 | 16 | 1 |
| 50000  | 25.452358 | 12 | 1 |
| 50000  | 26.377898 | 4  | 2 |
| 10000  | 35.707201 | 1  | 2 |
| 30000  | 23.47303  | 5  | 1 |
| 30000  | 30.730609 | 2  | 2 |
| 50000  | 28.30385  | 1  | 1 |
| 20000  | 26.222685 | 1  | 2 |
| 50000  | 34.696859 | 1  | 2 |
| 30000  | 29.03179  | 9  | 1 |
| 30000  | 23.630401 | 8  | 2 |
| 25000  | 29.432133 | 6  | 2 |
| 50000  | 20.239501 | 1  | 1 |
| 10000  | 23.495237 | 9  | 1 |
| 100000 | 27.392257 | 1  | 2 |
| 20000  | 27.766209 | 2  | 1 |
| 20000  | 16.976007 | 1  | 2 |
| 60000  | 24        | 5  | 2 |
| 10000  | 22.89282  | 1  | 1 |
| 10000  | 21.777778 | 10 | 1 |
| 10000  | 22.0741   | 5  | 1 |
| 20000  | 29.903029 | 5  | 2 |
| 40000  | 26.753213 | 18 | 1 |
| 30000  | 23.804801 | 2  | 1 |
| 30000  | 28.537455 | 10 | 2 |
| 10000  | 19.976219 | 6  | 2 |
| 30000  | 33.700518 | 11 | 2 |
| 100000 | 23.422368 | 13 | 2 |
| 50000  | 25.652633 | 5  | 2 |
| 12000  | 34.707761 | 1  | 2 |
| 20000  | 23.244595 | 4  | 1 |
| 100000 | 17.857143 | 6  | 1 |
| 100000 | 27.586207 | 18 | 2 |
| 10000  | 21.580034 | 3  | 1 |
| 15000  | 27.110583 | 9  | 2 |
| 30000  | 17.301038 | 11 | 1 |
| 20000  | 27.471384 | 3  | 2 |
| 50000  | 29.968783 | 4  | 1 |
| 15000  | 26.840668 | 6  | 2 |
| 18000  | 22.222222 | 5  | 2 |
| 30000  | 27.055151 | 6  | 1 |
| 175000 | 27.766209 | 1  | 1 |
| 20000  | 21.701389 | 15 | 2 |
| 50000  | 23.183391 | 6  | 2 |
| 60000  | 26.672763 | 8  | 1 |
| 30000  | 25.109569 | 5  | 1 |

|        |           |     |   |
|--------|-----------|-----|---|
| 60000  | 22.491349 | 5   | 1 |
| 100000 | 24.121749 | 12  | 2 |
| 35000  | 22.521508 | 1   | 2 |
| 15000  | 31.992171 | 6   | 1 |
| 30000  | 32.839182 | 3   | 2 |
| 5000   | 22.826881 | 2   | 2 |
| 15000  | 24.444444 | 6   | 2 |
| 25000  | 23.456558 | 3   | 2 |
| 30000  | 25.333333 | 3   | 2 |
| 25000  | 24.444444 | 1   | 2 |
| 20000  | 20.761246 | 10  | 1 |
| 20000  | 23.148148 | 3   | 1 |
| 15000  | 24.341758 | 2.5 | 2 |
| 40000  | 22.222222 | 12  | 2 |
| 27000  | 24.451073 | 10  | 2 |
| 1000   | 22.826881 | 3   | 2 |
| 10000  | 21.457268 | 5   | 1 |
| 10000  | 26.896181 | 3   | 2 |
| 13000  | 27.055151 | 10  | 2 |
| 10000  | 23.495237 | 2   | 2 |
| 40000  | 27.02581  | 4   | 2 |
| 25000  | 25.510204 | 4   | 2 |
| 20000  | 28.804414 | 3   | 1 |
| 30000  | 31.957633 | 3   | 1 |
| 6000   | 24.796667 | 6   | 2 |
| 8000   | 20.811655 | 5   | 2 |
| 40000  | 22.213678 | 5   | 2 |
| 60000  | 19.290123 | 2   | 2 |
| 50000  | 26.314635 | 2   | 1 |
| 60000  | 18.765247 | 1   | 2 |
| 25000  | 30.700408 | 6   | 2 |
| 50000  | 25.333333 | 7   | 2 |
| 50000  | 23.225432 | 8   | 1 |
| 5000   | 22.222222 | 1   | 2 |
| 7000   | 25.910684 | 3   | 2 |
| 8000   | 24.801587 | 2   | 2 |
| 10000  | 19.817677 | 2   | 2 |
| 25000  | 19.396188 | 12  | 2 |
| 50000  | 23.725286 | 4   | 2 |
| 50000  | 25.390625 | 2   | 1 |
| 15000  | 20.811655 | 3   | 1 |
| 15000  | 18.645344 | 6   | 1 |
| 35000  | 23.4375   | 2   | 2 |
| 3500   | 25.887574 | 4   | 2 |
| 1000   | 25.969529 | 5   | 1 |
| 35000  | 21.227888 | 5   | 2 |
| 8000   | 38.049941 | 4   | 2 |
| 20000  | 27.681661 | 8   | 2 |
| 15000  | 23.4375   | 1   | 2 |
| 15000  | 28        | 8   | 2 |

|        |           |    |   |
|--------|-----------|----|---|
| 1000   | 19.051974 | 10 | 1 |
| 16000  | 27.34375  | 2  | 1 |
| 12000  | 21.952479 | 5  | 1 |
| 20000  | 20.811655 | 3  | 1 |
| 20000  | 24.221453 | 1  | 2 |
| 10000  | 19.53125  | 10 | 1 |
| 8000   | 24.21875  | 3  | 2 |
| 10000  | 22.89282  | 1  | 2 |
| 50000  | 21.564545 | 8  | 2 |
| 12000  | 35.209546 | 1  | 2 |
| 10000  | 31.111111 | 12 | 2 |
| 5000   | 22.862369 | 1  | 1 |
| 10000  | 30.222222 | 6  | 2 |
| 20000  | 31.217482 | 4  | 2 |
| 15000  | 21.750197 | 8  | 2 |
| 10000  | 22.862369 | 6  | 2 |
| 9000   | 23.588329 | 10 | 2 |
| 15000  | 32.79321  | 7  | 2 |
| 5000   | 20        | 10 | 2 |
| 8000   | 28.14787  | 4  | 2 |
| 10000  | 31.111111 | 20 | 2 |
| 20000  | 22.222222 | 7  | 2 |
| 15000  | 31.46837  | 1  | 2 |
| 20000  | 30.612245 | 14 | 2 |
| 10000  | 25.566107 | 8  | 2 |
| 15000  | 33.217993 | 8  | 1 |
| 10000  | 24.121749 | 7  | 1 |
| 20000  | 24.977043 | 5  | 1 |
| 8000   | 28.888889 | 10 | 1 |
| 3000   | 21.303949 | 8  | 2 |
| 50000  | 21.222808 | 20 | 2 |
| 20000  | 30.102119 | 16 | 1 |
| 15000  | 29.296875 | 1  | 2 |
| 15000  | 23.388687 | 3  | 2 |
| 20000  | 29.260067 | 1  | 1 |
| 10000  | 27.845845 | 20 | 2 |
| 15000  | 25.109569 | 5  | 2 |
| 15000  | 26.709402 | 10 | 1 |
| 15000  | 23.183391 | 7  | 1 |
| 20000  | 28.577961 | 2  | 1 |
| 500000 | 27.111111 | 15 | 1 |
| 20000  | 28.763971 | 8  | 2 |
| 35000  | 27.268006 | 3  | 2 |
| 5000   | 22.347782 | 8  | 1 |
| 25000  | 31.163435 | 4  | 1 |
| 35000  | 22.476587 | 3  | 1 |
| 10000  | 18.666667 | 10 | 1 |
| 15000  | 21.641274 | 1  | 1 |
| 10000  | 21.333333 | 1  | 2 |
| 14000  | 20.451843 | 1  | 1 |

|       |           |    |   |
|-------|-----------|----|---|
| 10000 | 24.888889 | 3  | 1 |
| 15000 | 20.775623 | 3  | 1 |
| 10000 | 19.477147 | 4  | 2 |
| 30000 | 22.89282  | 1  | 2 |
| 10000 | 22.265625 | 7  | 1 |
| 7000  | 26.93572  | 5  | 1 |
| 10000 | 20.195092 | 1  | 1 |
| 10000 | 21.096191 | 9  | 1 |
| 50000 | 20.504934 | 12 | 1 |
| 35000 | 27.815882 | 2  | 1 |
| 6000  | 19.909972 | 15 | 1 |
| 10000 | 24.526818 | 5  | 1 |
| 8000  | 24.386526 | 7  | 2 |
| 2000  | 19.290123 | 7  | 2 |
| 3000  | 22.222222 | 12 | 1 |
| 15000 | 22.829964 | 3  | 2 |
| 90000 | 23.555556 | 6  | 2 |
| 10000 | 22.640865 | 10 | 2 |
| 10000 | 22.582709 | 3  | 1 |
| 10000 | 14.0625   | 20 | 1 |
| 15000 | 18.517804 | 7  | 2 |
| 50000 | 26.291724 | 3  | 1 |
| 20000 | 21.303949 | 4  | 2 |
| 2000  | 15.055139 | 12 | 2 |
| 6000  | 21.773842 | 14 | 1 |
| 10000 | 43.801653 | 8  | 1 |
| 2000  | 25.510204 | 15 | 1 |
| 10000 | 21.641274 | 10 | 1 |
| 50000 | 17.008821 | 1  | 2 |
| 10000 | 24.767566 | 2  | 2 |
| 15000 | 22.862369 | 13 | 2 |
| 35000 | 19.84127  | 1  | 1 |
| 5000  | 19.227688 | 9  | 1 |
| 3000  | 22.265625 | 2  | 1 |
| 20000 | 20.504934 | 11 | 2 |
| 20000 | 23.191095 | 3  | 1 |
| 20000 | 23.4375   | 1  | 2 |
| 10000 | 20.936639 | 2  | 2 |
| 10000 | 16.447368 | 8  | 1 |
| 25000 | 21.501886 | 1  | 1 |
| 10000 | 20.079601 | 1  | 1 |
| 15000 | 22.313278 | 5  | 2 |
| 10000 | 20.281233 | 18 | 1 |
| 3000  | 21.230572 | 19 | 1 |
| 30000 | 20.957171 | 24 | 2 |
| 5000  | 24.341758 | 15 | 1 |
| 5000  | 21.338211 | 30 | 1 |
| 8000  | 22.37568  | 3  | 2 |
| 10000 | 22.189349 | 12 | 1 |
| 50000 | 21.71925  | 18 | 1 |

|        |           |    |   |
|--------|-----------|----|---|
| 6000   | 20.545694 | 10 | 1 |
| 20000  | 24.386526 | 16 | 1 |
| 12000  | 29.069767 | 12 | 1 |
| 5000   | 29.069767 | 12 | 1 |
| 2000   | 21.875    | 8  | 2 |
| 10000  | 30.863036 | 9  | 1 |
| 8000   | 26.027582 | 2  | 2 |
| 10000  | 21.227888 | 36 | 2 |
| 5000   | 20.957171 | 24 | 2 |
| 10000  | 21.007668 | 3  | 1 |
| 20000  | 24.092971 | 5  | 2 |
| 16000  | 27.47624  | 10 | 1 |
| 3000   | 23.738662 | 8  | 1 |
| 5000   | 28.959    | 4  | 1 |
| 10000  | 25.964542 | 9  | 1 |
| 40000  | 22.265625 | 2  | 2 |
| 2000   | 24.304618 | 10 | 1 |
| 10000  | 18.559557 | 12 | 1 |
| 5000   | 24.677021 | 15 | 1 |
| 10000  | 15.943878 | 12 | 1 |
| 20000  | 22.83737  | 5  | 1 |
| 100000 | 19.692665 | 12 | 1 |
| 15000  | 23.337684 | 10 | 1 |
| 18000  | 22.491349 | 10 | 2 |
| 12000  | 19.53125  | 5  | 2 |
| 10000  | 21.936347 | 12 | 1 |
| 15000  | 18.305769 | 16 | 1 |
| 10000  | 29.721079 | 15 | 1 |
| 10000  | 25.344353 | 8  | 2 |
| 5000   | 17.71542  | 1  | 1 |
| 30000  | 21.192742 | 2  | 1 |
| 3000   | 26.171875 | 2  | 2 |
| 25000  | 20.545694 | 20 | 1 |
| 50000  | 21.333333 | 7  | 1 |
| 30000  | 23.458562 | 10 | 1 |
| 10000  | 19.396188 | 9  | 1 |
| 2000   | 17.1875   | 20 | 2 |
| 15000  | 29.7442   | 1  | 2 |
| 100000 | 21.671258 | 22 | 1 |
| 15000  | 29.054752 | 15 | 2 |
| 20000  | 21.383942 | 15 | 1 |
| 30000  | 23.566632 | 3  | 1 |
| 80000  | 22.600263 | 17 | 1 |
| 22000  | 24.382716 | 10 | 1 |
| 80000  | 25.076193 | 12 | 1 |
| 20000  | 25.951557 | 3  | 1 |
| 30000  | 26.233556 | 7  | 1 |
| 2000   | 19.051974 | 6  | 2 |
| 9000   | 22.476587 | 10 | 2 |
| 30000  | 22.679952 | 3  | 1 |



|        |           |    |   |
|--------|-----------|----|---|
| 50000  | 22.862369 | 7  | 1 |
| 25000  | 20.775623 | 2  | 2 |
| 120000 | 23.781213 | 4  | 2 |
| 12000  | 22.518296 | 20 | 2 |
| 20000  | 22.984009 | 3  | 1 |
| 5000   | 18.591037 | 5  | 1 |
| 50000  | 24.776795 | 10 | 2 |
| 25000  | 26.479182 | 9  | 1 |
| 12000  | 25.148605 | 6  | 2 |
| 120000 | 25.969529 | 5  | 1 |
| 20000  | 46.237245 | 12 | 1 |
| 20000  | 27.407657 | 3  | 2 |
| 10000  | 23.805402 | 4  | 1 |
| 10000  | 18.08021  | 7  | 1 |
| 20000  | 32.142857 | 2  | 1 |
| 15000  | 23.337684 | 6  | 2 |
| 10000  | 24.21875  | 3  | 2 |
| 20000  | 26.142688 | 14 | 2 |
| 15000  | 33.770449 | 1  | 2 |
| 100000 | 25.78125  | 15 | 1 |
| 15000  | 21.701389 | 1  | 1 |
| 40000  | 26.672763 | 8  | 2 |
| 15000  | 27.678739 | 1  | 2 |
| 10000  | 18.510806 | 1  | 1 |
| 12000  | 21.359915 | 12 | 2 |
| 8000   | 25.23634  | 1  | 2 |
| 20000  | 24.524346 | 1  | 1 |
| 15000  | 18.858822 | 2  | 1 |
| 60000  | 29.515939 | 1  | 2 |
| 20000  | 26.753213 | 8  | 2 |
| 25000  | 24.323229 | 1  | 2 |
| 18000  | 21.00073  | 7  | 1 |
| 7000   | 24.03461  | 5  | 2 |
| 9000   | 21.048048 | 8  | 2 |
| 15000  | 18.666667 | 16 | 1 |
| 7000   | 23.111111 | 5  | 2 |
| 15000  | 24.243918 | 3  | 2 |
| 5000   | 23.372576 | 5  | 2 |
| 5000   | 22.939751 | 4  | 1 |
| 10000  | 23.456558 | 4  | 2 |
| 20000  | 28.763971 | 1  | 2 |
| 5000   | 22.826881 | 13 | 1 |
| 20000  | 21.501886 | 4  | 2 |
| 6000   | 23.962052 | 4  | 1 |
| 3000   | 20.504934 | 8  | 1 |
| 5000   | 24.341758 | 2  | 2 |
| 45000  | 25        | 6  | 2 |
| 2000   | 20.342798 | 1  | 2 |
| 5000   | 18.369003 | 4  | 2 |
| 45000  | 21.875    | 2  | 1 |

|        |           |    |   |
|--------|-----------|----|---|
| 12000  | 22.832879 | 1  | 2 |
| 50000  | 18.325617 | 5  | 2 |
| 8000   | 24.349609 | 15 | 1 |
| 50000  | 25.15315  | 13 | 2 |
| 12000  | 18.420245 | 2  | 1 |
| 10000  | 22.432303 | 18 | 1 |
| 10000  | 25.969529 | 4  | 2 |
| 7000   | 15.788781 | 2  | 1 |
| 20000  | 24.196494 | 15 | 2 |
| 10000  | 23.046875 | 8  | 1 |
| 2000   | 24.121749 | 5  | 2 |
| 25000  | 17.857143 | 10 | 2 |
| 20000  | 31.957633 | 3  | 2 |
| 6000   | 26.666667 | 3  | 2 |
| 6000   | 20.544193 | 8  | 1 |
| 3000   | 24.653031 | 12 | 1 |
| 10000  | 24.141519 | 2  | 1 |
| 5000   | 21.738005 | 2  | 2 |
| 2000   | 21.325134 | 4  | 2 |
| 10000  | 22.826881 | 11 | 1 |
| 75000  | 24.243918 | 14 | 1 |
| 20000  | 24.349609 | 1  | 2 |
| 10000  | 21.333333 | 8  | 2 |
| 8000   | 19.223376 | 30 | 2 |
| 4000   | 21.907582 | 8  | 1 |
| 20000  | 23.495237 | 6  | 2 |
| 10000  | 24.538965 | 3  | 2 |
| 20000  | 25.065746 | 21 | 1 |
| 30000  | 22.862369 | 5  | 1 |
| 10000  | 20.576132 | 15 | 1 |
| 12000  | 22.222222 | 3  | 2 |
| 100000 | 26.838648 | 1  | 2 |
| 20000  | 23.372576 | 6  | 2 |
| 5000   | 24.349609 | 20 | 2 |
| 10000  | 37.165632 | 6  | 2 |
| 15000  | 31.111111 | 4  | 2 |
| 20000  | 25.47666  | 1  | 1 |
| 5000   | 28.617001 | 4  | 1 |
| 20000  | 17.604773 | 1  | 1 |
| 15000  | 20.239501 | 4  | 2 |
| 6000   | 23.372576 | 4  | 2 |
| 10000  | 28.125    | 1  | 2 |
| 5000   | 28.444444 | 12 | 2 |
| 20000  | 23.828125 | 6  | 1 |
| 8000   | 26.838648 | 2  | 2 |
| 10000  | 21.457268 | 4  | 2 |
| 8000   | 28.196921 | 2  | 2 |
| 4000   | 22.313278 | 2  | 1 |
| 20000  | 17.625381 | 2  | 1 |
| 10000  | 18.256319 | 5  | 2 |

|       |           |    |   |
|-------|-----------|----|---|
| 20000 | 20.284799 | 4  | 2 |
| 30000 | 20.576132 | 5  | 2 |
| 10000 | 26.479182 | 5  | 2 |
| 40000 | 32.455678 | 3  | 2 |
| 20000 | 33.622088 | 22 | 1 |
| 1500  | 23.668639 | 3  | 1 |
| 30000 | 21.333333 | 18 | 1 |
| 5000  | 26.892323 | 5  | 2 |
| 10000 | 22.506925 | 2  | 2 |
| 12000 | 27.141582 | 1  | 2 |
| 10000 | 24.141519 | 7  | 1 |
| 18000 | 27.111111 | 1  | 2 |
| 8000  | 22.230987 | 5  | 2 |
| 10000 | 23.148148 | 20 | 2 |
| 10000 | 33.121307 | 1  | 2 |
| 6000  | 26.672763 | 1  | 2 |
| 5000  | 24.767566 | 1  | 2 |
| 60000 | 26.672763 | 3  | 2 |
| 9000  | 20.281233 | 1  | 2 |
| 30000 | 20.775623 | 1  | 2 |
| 5000  | 21.096191 | 4  | 2 |
| 6000  | 19.051974 | 2  | 2 |
| 40000 | 29.333333 | 12 | 2 |
| 20000 | 21.096191 | 5  | 1 |
| 15000 | 28.408163 | 15 | 2 |
| 10000 | 33.284024 | 5  | 2 |
| 40000 | 26.026175 | 1  | 2 |
| 20000 | 25.344353 | 2  | 2 |
| 5000  | 26.89767  | 10 | 2 |
| 3000  | 21.219136 | 5  | 2 |
| 10000 | 24        | 5  | 2 |
| 40000 | 30.251934 | 4  | 2 |
| 20000 | 23.828125 | 1  | 2 |
| 40000 | 24.888889 | 1  | 2 |
| 3000  | 29.6875   | 3  | 2 |
| 10000 | 31.202564 | 2  | 2 |
| 15000 | 24.888889 | 2  | 1 |
| 4000  | 20.408163 | 2  | 2 |
| 12000 | 26.52392  | 3  | 2 |
| 10000 | 23.805402 | 1  | 2 |
| 15000 | 18.902038 | 17 | 1 |
| 14000 | 17.777778 | 7  | 2 |
| 4000  | 21.821067 | 1  | 2 |
| 5000  | 22.222222 | 2  | 2 |
| 4000  | 21.641274 | 10 | 2 |
| 3000  | 23.309053 | 12 | 1 |
| 2000  | 20.269357 | 6  | 2 |
| 30000 | 26.037494 | 3  | 2 |
| 7000  | 16.878858 | 2  | 1 |
| 10000 | 29.27796  | 1  | 2 |

|       |           |    |   |
|-------|-----------|----|---|
| 10000 | 23.4375   | 2  | 2 |
| 25000 | 23.148148 | 1  | 2 |
| 15000 | 25.969529 | 2  | 2 |
| 60000 | 19.396188 | 15 | 2 |
| 12000 | 27.700831 | 1  | 2 |
| 20000 | 24.238227 | 1  | 1 |
| 25000 | 24.888889 | 1  | 2 |
| 10000 | 24        | 3  | 2 |
| 40000 | 28.566482 | 2  | 2 |
| 10000 | 35.69304  | 4  | 1 |
| 20000 | 25.315454 | 1  | 2 |
| 10000 | 29.377583 | 5  | 2 |
| 30000 | 23.191095 | 4  | 2 |
| 40000 | 25.777778 | 1  | 2 |
| 15000 | 22.222222 | 1  | 1 |
| 10000 | 17.48179  | 20 | 2 |
| 3000  | 25.437481 | 2  | 2 |
| 50000 | 22.347782 | 3  | 2 |
| 15000 | 24.863952 | 1  | 2 |
| 11000 | 28.720083 | 18 | 2 |
| 9000  | 23.833005 | 3  | 2 |
| 50000 | 25.777778 | 10 | 2 |
| 60000 | 25.536704 | 2  | 2 |
| 20000 | 22.071078 | 2  | 2 |
| 7000  | 22.222222 | 30 | 2 |
| 10000 | 24.557752 | 12 | 2 |
| 20000 | 12.984765 | 4  | 2 |
| 20000 | 22.812934 | 2  | 2 |
| 7000  | 24.835763 | 12 | 1 |
| 20000 | 20.545694 | 10 | 2 |
| 7000  | 27.099251 | 1  | 2 |
| 3000  | 24.835763 | 2  | 2 |
| 15000 | 29.777778 | 1  | 2 |
| 6000  | 25.065746 | 3  | 2 |
| 20000 | 19.909972 | 10 | 2 |
| 5000  | 22.189349 | 17 | 2 |
| 30000 | 23.456558 | 3  | 2 |
| 15000 | 26.740477 | 5  | 2 |
| 20000 | 24.526818 | 18 | 2 |
| 3000  | 24        | 2  | 2 |
| 16000 | 20.888889 | 1  | 2 |
| 5000  | 27.555556 | 3  | 2 |
| 12000 | 15.555556 | 4  | 1 |
| 15000 | 26.666667 | 20 | 2 |
| 5000  | 18.730489 | 1  | 1 |
| 30000 | 19.477147 | 16 | 1 |
| 4000  | 25.636917 | 2  | 2 |
| 5000  | 26.564345 | 1  | 2 |
| 20000 | 22.222222 | 6  | 2 |
| 8000  | 25.065746 | 21 | 2 |

|        |           |    |   |
|--------|-----------|----|---|
| 15000  | 22.183642 | 1  | 2 |
| 8000   | 20.25463  | 1  | 2 |
| 7000   | 24.653031 | 6  | 2 |
| 10000  | 21.457268 | 1  | 2 |
| 20000  | 22.049165 | 1  | 2 |
| 16000  | 27.006173 | 3  | 1 |
| 15000  | 19.290123 | 1  | 2 |
| 35000  | 31.632653 | 3  | 2 |
| 19000  | 25.103878 | 10 | 1 |
| 7000   | 18.730489 | 2  | 2 |
| 150000 | 27.305188 | 1  | 2 |
| 22000  | 22.959184 | 4  | 2 |
| 6000   | 24.594907 | 6  | 1 |
| 6000   | 22.987427 | 13 | 2 |
| 10000  | 22.071078 | 16 | 2 |
| 6000   | 21.913806 | 8  | 2 |
| 30000  | 37.061362 | 2  | 2 |
| 15000  | 26.52392  | 5  | 2 |
| 30000  | 36.888889 | 1  | 2 |
| 5000   | 29.515939 | 1  | 2 |
| 9000   | 24.464602 | 8  | 1 |
| 20000  | 20.957171 | 8  | 1 |
| 5000   | 21.208449 | 15 | 1 |
| 7000   | 22.27531  | 24 | 1 |
| 7000   | 16.866251 | 3  | 2 |
| 20000  | 21.403092 | 2  | 2 |
| 1000   | 33.760388 | 4  | 2 |
| 20000  | 29.242109 | 8  | 1 |
| 20000  | 24.386526 | 10 | 2 |
| 12000  | 22.506925 | 1  | 2 |
| 5000   | 20.957171 | 3  | 1 |
| 20000  | 24.609375 | 14 | 1 |
| 7000   | 23.555556 | 4  | 2 |
| 8500   | 22.347782 | 9  | 2 |
| 20000  | 20.79673  | 5  | 2 |
| 8000   | 38.77551  | 2  | 2 |
| 5000   | 27.02581  | 5  | 1 |
| 7000   | 21.913806 | 5  | 1 |
| 20000  | 25.559414 | 5  | 2 |
| 10000  | 24.112654 | 1  | 2 |
| 40000  | 27.392257 | 2  | 2 |
| 10000  | 30.381944 | 1  | 2 |
| 10000  | 26.666667 | 1  | 2 |
| 5000   | 20.17264  | 7  | 2 |
| 150000 | 23.781213 | 3  | 1 |
| 15000  | 35.003199 | 12 | 2 |
| 10000  | 24.691358 | 5  | 1 |
| 12000  | 18.877551 | 5  | 2 |
| 20000  | 29.964328 | 1  | 2 |
| 25000  | 27.772267 | 6  | 2 |

|       |           |     |   |
|-------|-----------|-----|---|
| 8000  | 29.964328 | 7   | 1 |
| 10000 | 28.763971 | 1   | 2 |
| 8000  | 24.732461 | 1   | 2 |
| 10000 | 25.390625 | 2   | 2 |
| 15000 | 25        | 12  | 2 |
| 35000 | 20.68515  | 7   | 1 |
| 10000 | 20.888889 | 12  | 2 |
| 5000  | 23.92569  | 12  | 2 |
| 5000  | 23.011177 | 15  | 1 |
| 10000 | 22.769438 | 3   | 2 |
| 4000  | 24.888889 | 3   | 2 |
| 15000 | 25.566107 | 5   | 2 |
| 7000  | 25.299376 | 10  | 2 |
| 5000  | 15.788781 | 2   | 2 |
| 20000 | 23.372576 | 2   | 2 |
| 22000 | 26.502116 | 12  | 2 |
| 6000  | 26.438071 | 1   | 2 |
| 15000 | 28.841532 | 2   | 1 |
| 15000 | 27.111111 | 1   | 2 |
| 20000 | 25.390625 | 5   | 2 |
| 4000  | 16.888889 | 1   | 2 |
| 15000 | 16.444444 | 2   | 1 |
| 10000 | 18.974532 | 1   | 2 |
| 15000 | 24.196494 | 1.5 | 2 |
| 15000 | 27.700831 | 3   | 2 |
| 9000  | 25.559414 | 3   | 2 |
| 10000 | 31.111111 | 5   | 2 |
| 15000 | 20.451843 | 3   | 2 |
| 12000 | 28.537455 | 6   | 2 |
| 15000 | 27.239224 | 4   | 1 |
| 12000 | 28.888889 | 2   | 2 |
| 40000 | 19.341401 | 9   | 2 |
| 15000 | 23.111111 | 3   | 2 |
| 9000  | 20.775623 | 17  | 1 |
| 10000 | 24.940095 | 2   | 2 |
| 10000 | 19.500595 | 10  | 2 |
| 18000 | 20.661157 | 4   | 2 |
| 4000  | 28.305332 | 4   | 2 |
| 10000 | 27.303438 | 2   | 2 |
| 10000 | 25.333083 | 2   | 2 |
| 8000  | 20.444444 | 5   | 2 |
| 8000  | 25.333083 | 8   | 2 |
| 5000  | 29.166667 | 2   | 2 |
| 7000  | 19.290123 | 2   | 2 |
| 10000 | 24.776795 | 2   | 2 |
| 5000  | 40.972222 | 2   | 2 |
| 45000 | 26.740477 | 6   | 2 |
| 10000 | 23.875115 | 6   | 2 |
| 10000 | 24.386526 | 13  | 2 |
| 10000 | 18.261505 | 1   | 2 |

|        |           |    |   |
|--------|-----------|----|---|
| 10000  | 40.972222 | 9  | 2 |
| 15000  | 23.308867 | 8  | 2 |
| 10000  | 21.082813 | 3  | 1 |
| 10000  | 21.821067 | 5  | 2 |
| 45000  | 18.718042 | 8  | 1 |
| 20000  | 16.878858 | 2  | 2 |
| 15000  | 23.555556 | 20 | 1 |
| 15000  | 24.87772  | 10 | 2 |
| 8000   | 20.028842 | 2  | 2 |
| 20000  | 17.146776 | 3  | 2 |
| 30000  | 19.17458  | 3  | 2 |
| 20000  | 24.888889 | 13 | 1 |
| 7000   | 32.029086 | 4  | 1 |
| 20000  | 24.323229 | 5  | 1 |
| 50000  | 17.625381 | 12 | 1 |
| 8000   | 19.140625 | 12 | 1 |
| 70000  | 23.739956 | 25 | 2 |
| 10000  | 22.832879 | 23 | 1 |
| 10000  | 23.495237 | 8  | 2 |
| 50000  | 26.530612 | 6  | 2 |
| 60000  | 21.208449 | 10 | 1 |
| 5000   | 25.788534 | 9  | 2 |
| 8000   | 42.806183 | 1  | 2 |
| 32000  | 24.973985 | 1  | 2 |
| 25000  | 23.140496 | 2  | 1 |
| 30000  | 25.910684 | 5  | 1 |
| 20000  | 24.33748  | 1  | 2 |
| 15000  | 22.10029  | 15 | 2 |
| 30000  | 33.163265 | 13 | 2 |
| 500000 | 17.263545 | 3  | 2 |
| 20000  | 23.828125 | 5  | 2 |
| 15000  | 24.557752 | 2  | 1 |
| 30000  | 22.222222 | 12 | 1 |
| 20000  | 20        | 1  | 2 |
| 5000   | 31.25     | 3  | 2 |
| 8000   | 14.098461 | 2  | 1 |
| 7000   | 27.053803 | 28 | 1 |
| 10000  | 23.140496 | 1  | 2 |
| 7000   | 21.913806 | 1  | 1 |
| 20000  | 23.372576 | 3  | 2 |
| 30000  | 23.148148 | 5  | 2 |
| 70000  | 20.17264  | 2  | 2 |
| 6000   | 24.456063 | 12 | 1 |
| 40000  | 15.755751 | 5  | 1 |
| 20000  | 24.747454 | 22 | 1 |
| 10000  | 25.204789 | 6  | 2 |
| 7000   | 23.738662 | 2  | 1 |
| 10000  | 25.536704 | 3  | 2 |
| 8000   | 24.444444 | 2  | 2 |
| 12000  | 23.805402 | 1  | 1 |

|       |           |    |   |
|-------|-----------|----|---|
| 60000 | 21.403092 | 3  | 2 |
| 25000 | 25.536704 | 4  | 2 |
| 10000 | 28.999307 | 5  | 2 |
| 15000 | 23.233456 | 15 | 2 |
| 20000 | 25.636917 | 3  | 2 |
| 20000 | 26.222222 | 14 | 1 |
| 7000  | 26.402355 | 3  | 2 |
| 50000 | 29.048656 | 3  | 1 |
| 50000 | 29.094282 | 8  | 2 |
| 10000 | 19.814053 | 1  | 2 |
| 10000 | 25.07716  | 3  | 2 |
| 50000 | 24.034407 | 9  | 2 |
| 3000  | 22.773186 | 1  | 2 |
| 25000 | 24.910767 | 11 | 2 |
| 5000  | 25.636917 | 4  | 2 |
| 30000 | 27.776706 | 1  | 2 |
| 30000 | 20.415225 | 20 | 1 |
| 15000 | 26.709402 | 6  | 2 |
| 10000 | 18.131219 | 4  | 1 |
| 6000  | 21.778435 | 2  | 1 |
| 10000 | 22.862534 | 25 | 1 |
| 30000 | 22.812934 | 12 | 1 |
| 5000  | 23.4375   | 11 | 2 |
| 10000 | 30.757401 | 15 | 1 |
| 30000 | 24.6755   | 7  | 2 |
| 20000 | 18.090339 | 5  | 2 |
| 10000 | 26.402355 | 7  | 2 |
| 20000 | 20.342798 | 3  | 2 |
| 15000 | 32.454717 | 1  | 2 |
| 7000  | 28.763971 | 8  | 2 |
| 40000 | 25.333333 | 6  | 1 |
| 25000 | 28        | 5  | 1 |
| 20000 | 48.65917  | 9  | 2 |
| 10000 | 24.577867 | 3  | 2 |
| 15000 | 22.665895 | 11 | 2 |
| 15000 | 26.666667 | 6  | 2 |
| 3000  | 22.071078 | 10 | 2 |
| 15000 | 28.888889 | 20 | 1 |
| 7000  | 28.133657 | 1  | 2 |
| 7000  | 24.112654 | 1  | 1 |
| 5000  | 29.864958 | 4  | 2 |
| 10000 | 23.612751 | 2  | 2 |
| 5000  | 19.692665 | 12 | 1 |
| 60000 | 23.781213 | 4  | 2 |
| 10000 | 22.518296 | 20 | 2 |
| 3000  | 23.738662 | 8  | 1 |
| 30000 | 22.600263 | 17 | 1 |
| 4000  | 24.776795 | 10 | 2 |
| 5000  | 30.700408 | 1  | 1 |
| 15000 | 31.202564 | 7  | 2 |



|       |           |    |   |
|-------|-----------|----|---|
| 15000 | 48.072562 | 1  | 2 |
| 2000  | 22.812934 | 1  | 2 |
| 10000 | 23.725286 | 2  | 1 |
| 10000 | 17.777778 | 12 | 1 |
| 20000 | 18.256319 | 1  | 2 |
| 3000  | 17.843364 | 7  | 2 |
| 30000 | 20.613131 | 3  | 2 |
| 3000  | 25.536704 | 1  | 1 |
| 5000  | 26.953125 | 1  | 1 |
| 10000 | 20        | 6  | 2 |
| 80000 | 29.899691 | 1  | 2 |
| 5000  | 29.094282 | 2  | 2 |
| 10000 | 20.775623 | 1  | 2 |
| 5000  | 27.434842 | 1  | 2 |
| 15000 | 16.46436  | 12 | 1 |
| 15000 | 21.082813 | 5  | 2 |
| 5000  | 31.644286 | 12 | 2 |
| 10000 | 35.142734 | 4  | 2 |
| 20000 | 19.53125  | 1  | 1 |
| 4000  | 27.830288 | 7  | 2 |
| 12000 | 16.444444 | 5  | 2 |
| 15000 | 22.582709 | 2  | 2 |
| 5000  | 21.641274 | 1  | 1 |
| 10000 | 24.973985 | 8  | 2 |
| 8000  | 20.077748 | 2  | 1 |
| 15000 | 27.407657 | 2  | 2 |
| 10000 | 27.209608 | 4  | 2 |
| 3000  | 19.555556 | 1  | 2 |
| 30000 | 26.142688 | 3  | 2 |
| 15000 | 32.439446 | 2  | 2 |
| 3000  | 26.370238 | 3  | 2 |
| 30000 | 20.888889 | 12 | 1 |
| 8000  | 27.268006 | 1  | 2 |
| 20000 | 19.17458  | 1  | 2 |
| 10000 | 23.422091 | 2  | 1 |
| 7000  | 26.838648 | 19 | 2 |
| 6000  | 23.634033 | 12 | 2 |
| 6000  | 19.562955 | 1  | 2 |
| 60000 | 29.777778 | 10 | 1 |
| 30000 | 21.219136 | 3  | 1 |
| 10000 | 15.822159 | 1  | 2 |
| 5000  | 27.434842 | 4  | 2 |
| 20000 | 30.769231 | 7  | 1 |
| 11500 | 24.21875  | 1  | 1 |
| 10000 | 25.390625 | 6  | 2 |
| 10000 | 21.821067 | 7  | 2 |
| 6000  | 23.233456 | 7  | 2 |
| 50000 | 33.777444 | 2  | 2 |
| 40000 | 27.040816 | 4  | 2 |
| 20000 | 29.154519 | 20 | 2 |

---

|       |           |   |   |
|-------|-----------|---|---|
| 10000 | 24.87772  | 5 | 2 |
| 2500  | 32.046146 | 2 | 2 |

| Q20_FBG | Q21_RBG | rec_current_smok | Q26_current_SLT |
|---------|---------|------------------|-----------------|
| 8.9     | 10.9    | 2                | 2               |
| 7.2     | 11.5    | 2                | 2               |
| 6.4     | 10.5    | 2                | 2               |
| 9       | 12      | 2                | 2               |
| 9.8     | 13.5    | 2                | 1               |
| 6.4     | 9.1     | 2                | 2               |
| 5.5     | 8.4     | 2                | 2               |
| 5.7     | 7.8     | 2                | 2               |
| 5.2     | 6.6     | 2                | 1               |
| 7.7     | 12      | 2                | 1               |
| 6.6     | 8.9     | 2                | 1               |
| 6.2     | 11.2    | 2                | 1               |
| 5.5     | 7.8     | 2                | 2               |
| 6.5     | 8.4     | 2                | 2               |
| 7.9     | 8.9     | 2                | 2               |
| 6.3     | 11.5    | 2                | 2               |
| 6.9     | 9.5     | 2                | 2               |
| 3.2     | 11.5    | 2                | 2               |
| 5.8     | 7.2     | 2                | 2               |
| 5.3     | 7.6     | 2                | 1               |
| 7.1     | 14.7    | 2                | 1               |
| 9.7     | 16.9    | 2                | 2               |
| 5.2     | 9.9     | 1                | 2               |
| 9.1     | 11.3    | 2                | 2               |
| 8.5     | 13.6    | 2                | 2               |
| 4.5     | 12.5    | 2                | 2               |
| 5.2     | 9.7     | 1                | 1               |
| 6       | 10.2    | 2                | 2               |
| 7       | 12.7    | 2                | 2               |
| 5.3     | 6.4     | 1                | 1               |
| 4.1     | 7.2     | 2                | 2               |
| 6.6     | 8.6     | 1                | 2               |
| 10      | 18      | 2                | 2               |
| 17.9    | 14.2    | 2                | 2               |
| 10      | 15      | 1                | 2               |
| 6.8     | 13.2    | 2                | 2               |
| 6       | 7.5     | 2                | 2               |
| 4.1     | 7.2     | 2                | 2               |
| 5.9     | 12.5    | 1                | 1               |
| 6.6     | 9.9     | 2                | 1               |
| 6.9     | 10.7    | 2                | 2               |
| 5.8     | 7.2     | 2                | 2               |
| 6.2     | 8.1     | 2                | 1               |
| 4.2     | 9.6     | 1                | 2               |
| 5.9     | 7.7     | 1                | 2               |
| 5       | 8.9     | 2                | 1               |
| 5.9     | 11.1    | 2                | 2               |
| 8.8     | 16      | 1                | 1               |

|       |      |   |   |
|-------|------|---|---|
| 5.2   | 6.9  | 2 | 1 |
| 6.9   | 8.6  | 2 | 2 |
| 6.8   | 11.2 | 2 | 2 |
| 7     | 8.5  | 2 | 2 |
| 6.8   | 8.9  | 2 | 2 |
| 6.7   | 11.9 | 2 | 2 |
| 6.911 | 11.1 | 2 | 2 |
| 7.2   | 8.3  | 2 | 2 |
| 6.2   | 7.2  | 2 | 2 |
| 9     | 13   | 2 | 2 |
| 6.7   | 13   | 2 | 2 |
| 6     | 10.5 | 2 | 2 |
| 5.9   | 10.2 | 2 | 2 |
| 5.1   | 8.2  | 2 | 2 |
| 6.4   | 13.9 | 1 | 2 |
| 5.7   | 9.8  | 2 | 1 |
| 6     | 11   | 1 | 1 |
| 5.8   | 9.9  | 2 | 2 |
| 9.3   | 9.9  | 2 | 2 |
| 6.7   | 10.3 | 2 | 1 |
| 8.2   | 11.5 | 2 | 1 |
| 6.4   | 8.4  | 1 | 2 |
| 6.8   | 11   | 2 | 1 |
| 5.2   | 8    | 2 | 2 |
| 8.1   | 12   | 2 | 2 |
| 4.9   | 6.2  | 2 | 2 |
| 5.8   | 8    | 2 | 1 |
| 7.2   | 11.2 | 2 | 2 |
| 8.8   | 14.4 | 2 | 1 |
| 5.3   | 7.2  | 2 | 2 |
| 6.5   | 10.8 | 2 | 2 |
| 7.4   | 8.4  | 2 | 2 |
| 6.4   | 7.8  | 2 | 1 |
| 6.2   | 7.5  | 2 | 2 |
| 7.4   | 13.5 | 2 | 2 |
| 6.7   | 7.4  | 2 | 2 |
| 6.9   | 9.2  | 2 | 2 |
| 7     | 10.8 | 2 | 2 |
| 7.2   | 10.7 | 2 | 2 |
| 6.6   | 8.1  | 2 | 1 |
| 6.8   | 12.1 | 2 | 2 |
| 5.1   | 6.1  | 2 | 2 |
| 6.6   | 7.6  | 2 | 2 |
| 6.1   | 11.6 | 2 | 2 |
| 6     | 10.4 | 2 | 2 |
| 8.3   | 10.8 | 2 | 2 |
| 6.4   | 8.8  | 2 | 2 |
| 7.2   | 13.7 | 2 | 1 |
| 7.2   | 11.9 | 2 | 2 |
| 7.9   | 13   | 2 | 2 |

|      |      |   |   |
|------|------|---|---|
| 8.1  | 10.1 | 2 | 2 |
| 9.2  | 11   | 2 | 2 |
| 11.6 | 14.2 | 2 | 2 |
| 6.2  | 7.9  | 2 | 2 |
| 4.3  | 4.9  | 2 | 1 |
| 6    | 10   | 2 | 2 |
| 11   | 13   | 2 | 1 |
| 8    | 9    | 2 | 2 |
| 7    | 10   | 2 | 2 |
| 8    | 9    | 2 | 2 |
| 9    | 14   | 2 | 2 |
| 5    | 9    | 2 | 2 |
| 4    | 7    | 2 | 2 |
| 7    | 9    | 2 | 1 |
| 6.5  | 7    | 2 | 2 |
| 8    | 10   | 2 | 2 |
| 7    | 13   | 2 | 1 |
| 6    | 9    | 2 | 1 |
| 7    | 14   | 2 | 2 |
| 7    | 12   | 2 | 2 |
| 7    | 9    | 2 | 1 |
| 7    | 10   | 2 | 2 |
| 6    | 8    | 2 | 1 |
| 8    | 4    | 2 | 2 |
| 7    | 6    | 2 | 2 |
| 8    | 11   | 2 | 2 |
| 7    | 10   | 2 | 1 |
| 6    | 8    | 2 | 2 |
| 6    | 14   | 2 | 2 |
| 13   | 17   | 2 | 2 |
| 11   | 16   | 2 | 1 |
| 4    | 7    | 2 | 2 |
| 10   | 17   | 2 | 2 |
| 8    | 11   | 2 | 1 |
| 5    | 7    | 2 | 2 |
| 6    | 14   | 2 | 2 |
| 12   | 14   | 2 | 2 |
| 8    | 11   | 2 | 2 |
| 9    | 10   | 2 | 2 |
| 7    | 10   | 2 | 2 |
| 8    | 11   | 2 | 1 |
| 9    | 12   | 2 | 2 |
| 13   | 18   | 2 | 2 |
| 7    | 9    | 2 | 2 |
| 4    | 14   | 2 | 2 |
| 7    | 9    | 2 | 2 |
| 10   | 11   | 2 | 2 |
| 6    | 9    | 2 | 2 |
| 5    | 6    | 2 | 2 |
| 9    | 10   | 2 | 2 |

|     |     |   |   |
|-----|-----|---|---|
| 9   | 11  | 2 | 2 |
| 10  | 12  | 2 | 2 |
| 6.4 | 7.2 | 2 | 2 |
| 6   | 10  | 2 | 2 |
| 9   | 10  | 2 | 2 |
| 11  | 12  | 2 | 2 |
| 9   | 16  | 2 | 2 |
| 7   | 11  | 2 | 2 |
| 14  | 24  | 2 | 2 |
| 6   | 8   | 2 | 1 |
| 7   | 13  | 2 | 1 |
| 7   | 11  | 2 | 2 |
| 5   | 6   | 2 | 2 |
| 14  | 19  | 2 | 2 |
| 5   | 9   | 2 | 2 |
| 8   | 11  | 2 | 1 |
| 13  | 17  | 2 | 1 |
| 11  | 14  | 2 | 1 |
| 6   | 8   | 2 | 1 |
| 6   | 10  | 2 | 2 |
| 11  | 13  | 2 | 1 |
| 12  | 13  | 2 | 1 |
| 6   | 11  | 2 | 2 |
| 14  | 22  | 2 | 2 |
| 7   | 12  | 2 | 2 |
| 3   | 12  | 2 | 2 |
| 7   | 8   | 2 | 2 |
| 6   | 7   | 2 | 2 |
| 9   | 16  | 2 | 2 |
| 8   | 12  | 2 | 2 |
| 5   | 6   | 2 | 2 |
| 9   | 14  | 2 | 2 |
| 14  | 16  | 2 | 1 |
| 8   | 9   | 2 | 2 |
| 6   | 7   | 2 | 2 |
| 7   | 9   | 2 | 2 |
| 8   | 18  | 2 | 2 |
| 8   | 10  | 2 | 2 |
| 9   | 11  | 2 | 2 |
| 6   | 8   | 2 | 2 |
| 20  | 22  | 2 | 2 |
| 10  | 12  | 2 | 2 |
| 10  | 11  | 2 | 1 |
| 6   | 16  | 2 | 2 |
| 7   | 10  | 2 | 2 |
| 8   | 12  | 2 | 2 |
| 6   | 11  | 2 | 2 |
| 5   | 9   | 2 | 2 |
| 8   | 10  | 2 | 1 |
| 7   | 8   | 2 | 2 |

|      |      |   |   |
|------|------|---|---|
| 5    | 8    | 2 | 2 |
| 9    | 12   | 2 | 2 |
| 17.4 | 8.4  | 2 | 1 |
| 11.8 | 14.5 | 2 | 2 |
| 5.6  | 13   | 2 | 2 |
| 7.9  | 9.1  | 2 | 2 |
| 9.4  | 12.5 | 2 | 2 |
| 9    | 11.2 | 2 | 2 |
| 8.7  | 13.3 | 2 | 2 |
| 10   | 15   | 2 | 1 |
| 13.3 | 24   | 2 | 2 |
| 7.6  | 9    | 2 | 2 |
| 6    | 8    | 2 | 2 |
| 5    | 7    | 2 | 2 |
| 6    | 8    | 2 | 2 |
| 6    | 10   | 2 | 2 |
| 4    | 9    | 2 | 2 |
| 9.5  | 17   | 2 | 2 |
| 7    | 4    | 2 | 2 |
| 6    | 11   | 2 | 2 |
| 14   | 22   | 2 | 2 |
| 11   | 14   | 2 | 2 |
| 6    | 7    | 2 | 2 |
| 6    | 8    | 2 | 2 |
| 17   | 30   | 2 | 2 |
| 6    | 17   | 2 | 2 |
| 8    | 16   | 2 | 2 |
| 8    | 14   | 2 | 2 |
| 7    | 16   | 2 | 2 |
| 6    | 19.9 | 1 | 2 |
| 8    | 14   | 2 | 2 |
| 6    | 10   | 1 | 2 |
| 5    | 9    | 2 | 2 |
| 9    | 14   | 1 | 2 |
| 12   | 19   | 1 | 2 |
| 5    | 9    | 2 | 2 |
| 7    | 9    | 2 | 2 |
| 7    | 10   | 2 | 2 |
| 8    | 8    | 2 | 2 |
| 9    | 12   | 2 | 2 |
| 5    | 6    | 2 | 2 |
| 6    | 13   | 1 | 1 |
| 9    | 14   | 2 | 2 |
| 6    | 7    | 2 | 2 |
| 12   | 18   | 1 | 1 |
| 7    | 9    | 2 | 2 |
| 8    | 12   | 2 | 2 |
| 14   | 21   | 1 | 2 |
| 13   | 17   | 2 | 1 |
| 7    | 10   | 2 | 2 |

|      |      |   |   |
|------|------|---|---|
| 8.7  | 13.3 | 2 | 2 |
| 10   | 15   | 2 | 1 |
| 13.3 | 24   | 2 | 2 |
| 7.6  | 9    | 2 | 2 |
| 6    | 8    | 2 | 2 |
| 5    | 7    | 2 | 2 |
| 6    | 8    | 2 | 2 |
| 6    | 10   | 2 | 2 |
| 4    | 8    | 2 | 2 |
| 9.5  | 17   | 2 | 2 |
| 7    | 9    | 2 | 2 |
| 10   | 15   | 2 | 1 |
| 13.3 | 24   | 2 | 2 |
| 7.6  | 9    | 2 | 2 |
| 6    | 8    | 2 | 2 |
| 5    | 7    | 2 | 2 |
| 6    | 8    | 2 | 2 |
| 6    | 10   | 2 | 2 |
| 4    | 5    | 2 | 2 |
| 9.5  | 17   | 2 | 2 |
| 7    | 4    | 2 | 2 |
| 6    | 11   | 2 | 2 |
| 10   | 18   | 2 | 1 |
| 11   | 13   | 2 | 2 |
| 9    | 13   | 2 | 2 |
| 15   | 18   | 2 | 1 |
| 10   | 11   | 2 | 1 |
| 9    | 13   | 2 | 1 |
| 10   | 18   | 2 | 1 |
| 7    | 13   | 2 | 2 |
| 9    | 13   | 2 | 2 |
| 6    | 16   | 2 | 1 |
| 4    | 10   | 2 | 2 |
| 9    | 13   | 2 | 1 |
| 10   | 18   | 2 | 1 |
| 5    | 7    | 2 | 2 |
| 7    | 12   | 2 | 2 |
| 15   | 18   | 2 | 1 |
| 10   | 11   | 2 | 1 |
| 17.4 | 8.4  | 2 | 1 |
| 11.8 | 14.5 | 2 | 2 |
| 5.6  | 13   | 2 | 2 |
| 7.9  | 9.1  | 2 | 2 |
| 9.4  | 12.5 | 2 | 2 |
| 9    | 11.2 | 2 | 2 |
| 8.7  | 13.3 | 2 | 2 |
| 10   | 15   | 2 | 1 |
| 5    | 9    | 2 | 2 |
| 7.6  | 9    | 2 | 2 |
| 6    | 8    | 2 | 2 |



|    |    |   |   |
|----|----|---|---|
| 5  | 7  | 2 | 2 |
| 6  | 8  | 2 | 2 |
| 7  | 14 | 2 | 1 |
| 7  | 8  | 1 | 2 |
| 8  | 10 | 2 | 1 |
| 8  | 16 | 2 | 1 |
| 7  | 8  | 2 | 1 |
| 8  | 16 | 2 | 2 |
| 8  | 10 | 2 | 2 |
| 7  | 9  | 2 | 2 |
| 9  | 19 | 2 | 2 |
| 7  | 8  | 2 | 2 |
| 7  | 16 | 2 | 1 |
| 6  | 10 | 2 | 2 |
| 8  | 13 | 2 | 2 |
| 6  | 11 | 2 | 2 |
| 7  | 11 | 2 | 2 |
| 14 | 17 | 2 | 2 |
| 10 | 14 | 2 | 1 |
| 11 | 16 | 2 | 2 |
| 9  | 11 | 2 | 2 |
| 6  | 9  | 2 | 1 |
| 9  | 11 | 2 | 2 |
| 11 | 17 | 2 | 2 |
| 7  | 11 | 2 | 2 |
| 5  | 9  | 2 | 2 |
| 13 | 23 | 2 | 2 |
| 8  | 14 | 2 | 1 |
| 7  | 11 | 2 | 2 |
| 7  | 16 | 2 | 2 |
| 6  | 12 | 1 | 2 |
| 7  | 14 | 2 | 1 |
| 7  | 8  | 1 | 2 |
| 7  | 12 | 1 | 1 |
| 7  | 8  | 2 | 2 |
| 4  | 10 | 2 | 2 |
| 12 | 20 | 2 | 2 |
| 9  | 10 | 2 | 1 |
| 9  | 11 | 2 | 2 |
| 5  | 11 | 2 | 2 |
| 5  | 10 | 2 | 2 |
| 6  | 16 | 2 | 1 |
| 7  | 8  | 2 | 2 |
| 13 | 15 | 2 | 2 |
| 11 | 14 | 2 | 2 |
| 6  | 8  | 2 | 2 |
| 9  | 11 | 2 | 2 |
| 6  | 7  | 1 | 1 |
| 7  | 8  | 2 | 2 |
| 6  | 8  | 1 | 2 |

|      |      |   |   |
|------|------|---|---|
| 5    | 9    | 2 | 2 |
| 5    | 9    | 2 | 2 |
| 5.5  | 8    | 2 | 2 |
| 13.4 | 20   | 2 | 2 |
| 8    | 14   | 2 | 2 |
| 7    | 11   | 2 | 2 |
| 6    | 8    | 2 | 2 |
| 7    | 9    | 2 | 2 |
| 8    | 12   | 2 | 2 |
| 5    | 7    | 2 | 2 |
| 6    | 11   | 2 | 2 |
| 8    | 11   | 2 | 2 |
| 9    | 14   | 2 | 2 |
| 8    | 11   | 2 | 2 |
| 5    | 8    | 2 | 2 |
| 7    | 8    | 2 | 1 |
| 8    | 3    | 2 | 2 |
| 11   | 18   | 2 | 1 |
| 15   | 20   | 2 | 1 |
| 6    | 8    | 2 | 2 |
| 5    | 7    | 2 | 1 |
| 14   | 17   | 2 | 2 |
| 5    | 7.2  | 2 | 2 |
| 8.1  | 11.3 | 2 | 2 |
| 5    | 7    | 2 | 1 |
| 7    | 9    | 2 | 2 |
| 7    | 9    | 2 | 2 |
| 5    | 10   | 2 | 2 |
| 5    | 8    | 2 | 2 |
| 6    | 13   | 2 | 2 |
| 5    | 8    | 2 | 2 |
| 9    | 12   | 2 | 2 |
| 8    | 10   | 2 | 1 |
| 15   | 20   | 2 | 1 |
| 8    | 10   | 2 | 2 |
| 6    | 8    | 2 | 2 |
| 8    | 11   | 2 | 2 |
| 11   | 20   | 2 | 2 |
| 9    | 11   | 2 | 2 |
| 8    | 10   | 2 | 1 |
| 6    | 9    | 2 | 2 |
| 14   | 15   | 2 | 2 |
| 11   | 12   | 2 | 1 |
| 6    | 8    | 1 | 2 |
| 5    | 9    | 2 | 2 |
| 6    | 7    | 2 | 2 |
| 6    | 10   | 2 | 2 |
| 4    | 8    | 1 | 2 |
| 7    | 10   | 1 | 1 |
| 9    | 13   | 2 | 2 |

|     |      |   |   |
|-----|------|---|---|
| 6   | 7    | 2 | 2 |
| 6   | 8    | 2 | 2 |
| 6.7 | 18   | 1 | 2 |
| 6.1 | 4.7  | 2 | 1 |
| 5.5 | 9.8  | 2 | 2 |
| 5.7 | 7.3  | 2 | 2 |
| 7.4 | 12.1 | 2 | 2 |
| 6.1 | 4.7  | 1 | 2 |
| 9.7 | 15.5 | 2 | 2 |
| 6.7 | 4.7  | 2 | 2 |
| 5.6 | 9    | 2 | 2 |
| 8   | 6    | 2 | 2 |
| 8   | 12.3 | 2 | 2 |
| 8   | 14   | 2 | 2 |
| 8.2 | 7    | 2 | 2 |
| 4   | 7    | 2 | 2 |
| 7   | 8    | 2 | 2 |
| 12  | 10   | 2 | 2 |
| 7   | 6    | 2 | 2 |
| 7   | 9    | 2 | 2 |
| 11  | 13   | 2 | 2 |
| 8   | 11   | 2 | 2 |
| 8   | 7    | 2 | 2 |
| 6   | 11   | 2 | 2 |
| 6   | 11.5 | 1 | 2 |
| 11  | 7.3  | 2 | 2 |
| 11  | 12   | 2 | 2 |
| 5   | 8    | 2 | 2 |
| 8   | 11.4 | 2 | 2 |
| 8   | 12   | 2 | 2 |
| 9   | 15   | 2 | 2 |
| 5   | 18   | 2 | 2 |
| 10  | 13   | 2 | 2 |
| 5   | 7    | 2 | 1 |
| 10  | 12   | 2 | 2 |
| 7   | 18   | 1 | 2 |
| 6   | 10   | 2 | 2 |
| 7   | 10   | 2 | 2 |
| 9   | 11   | 2 | 2 |
| 5   | 9    | 2 | 2 |
| 8   | 11   | 2 | 1 |
| 7   | 12   | 1 | 2 |
| 6   | 12   | 2 | 2 |
| 7   | 9    | 2 | 2 |
| 12  | 11   | 1 | 2 |
| 12  | 15   | 2 | 2 |
| 9   | 20   | 2 | 2 |
| 6   | 9    | 1 | 1 |
| 6   | 9    | 2 | 2 |
| 10  | 14   | 2 | 2 |

|    |     |   |   |
|----|-----|---|---|
| 9  | 10  | 2 | 2 |
| 6  | 9   | 2 | 2 |
| 6  | 7   | 2 | 1 |
| 13 | 15  | 2 | 1 |
| 5  | 7   | 2 | 2 |
| 5  | 9   | 2 | 1 |
| 8  | 12  | 2 | 2 |
| 5  | 7   | 2 | 1 |
| 11 | 14  | 2 | 1 |
| 7  | 9   | 2 | 2 |
| 13 | 15  | 2 | 2 |
| 13 | 14  | 2 | 2 |
| 7  | 8   | 2 | 2 |
| 7  | 8   | 2 | 2 |
| 6  | 7   | 2 | 2 |
| 12 | 11  | 2 | 1 |
| 7  | 9   | 2 | 2 |
| 11 | 12  | 2 | 2 |
| 15 | 18  | 2 | 1 |
| 8  | 11  | 2 | 1 |
| 6  | 8   | 2 | 2 |
| 9  | 11  | 2 | 2 |
| 8  | 10  | 2 | 2 |
| 9  | 11  | 2 | 2 |
| 9  | 11  | 2 | 1 |
| 12 | 16  | 2 | 1 |
| 6  | 8   | 2 | 2 |
| 18 | 20  | 2 | 2 |
| 7  | 9   | 2 | 2 |
| 8  | 14  | 2 | 2 |
| 10 | 20  | 2 | 2 |
| 5  | 8   | 2 | 2 |
| 13 | 18  | 2 | 1 |
| 6  | 12  | 2 | 2 |
| 6  | 8   | 2 | 2 |
| 11 | 18  | 2 | 2 |
| 7  | 9   | 2 | 1 |
| 8  | 14  | 2 | 2 |
| 4  | 8   | 2 | 2 |
| 7  | 9   | 2 | 2 |
| 6  | 7   | 2 | 2 |
| 7  | 8   | 2 | 2 |
| 5  | 9   | 2 | 1 |
| 7  | 9   | 2 | 1 |
| 7  | 9   | 2 | 2 |
| 7  | 9   | 2 | 2 |
| 7  | 9   | 2 | 1 |
| 7  | 8   | 2 | 2 |
| 11 | 14  | 2 | 1 |
| 7  | 6.5 | 2 | 2 |

|      |      |   |   |
|------|------|---|---|
| 7    | 8    | 2 | 1 |
| 7    | 9    | 2 | 2 |
| 8    | 11.1 | 2 | 1 |
| 6.3  | 9.8  | 2 | 2 |
| 11.8 | 13.1 | 2 | 1 |
| 9.1  | 11.8 | 2 | 1 |
| 5.2  | 8.1  | 2 | 1 |
| 8.5  | 9    | 2 | 1 |
| 9.2  | 10   | 2 | 2 |
| 5.2  | 7.8  | 2 | 2 |
| 6    | 7.2  | 2 | 2 |
| 4.7  | 5.9  | 2 | 2 |
| 4.7  | 6.8  | 2 | 1 |
| 6.8  | 9.8  | 2 | 2 |
| 6.5  | 12.1 | 2 | 2 |
| 12.7 | 17.7 | 2 | 2 |
| 6.4  | 11.4 | 2 | 2 |
| 6.8  | 9.1  | 2 | 2 |
| 3.1  | 8.8  | 2 | 2 |
| 11.6 | 19   | 2 | 2 |
| 4.2  | 6.3  | 2 | 2 |
| 6.8  | 9.3  | 2 | 2 |
| 7.9  | 16.3 | 2 | 2 |
| 15.2 | 22.4 | 2 | 2 |
| 10.4 | 18.1 | 2 | 1 |
| 6.1  | 7.9  | 2 | 1 |
| 6.8  | 10.3 | 2 | 2 |
| 6.8  | 7.9  | 2 | 2 |
| 6.3  | 8.3  | 2 | 2 |
| 12.2 | 14.2 | 2 | 1 |
| 5.4  | 7    | 2 | 2 |
| 6.4  | 7.7  | 2 | 2 |
| 7.5  | 8.5  | 2 | 2 |
| 10.8 | 16.1 | 2 | 2 |
| 5    | 7.3  | 2 | 1 |
| 16.6 | 18.2 | 2 | 2 |
| 6    | 12.9 | 2 | 1 |
| 6.2  | 16.2 | 2 | 2 |
| 10.7 | 13.2 | 2 | 2 |
| 6.7  | 9.3  | 2 | 1 |
| 11   | 14   | 2 | 2 |
| 7.2  | 11.2 | 2 | 2 |
| 5    | 9.2  | 2 | 2 |
| 6.4  | 9    | 2 | 2 |
| 5.3  | 8    | 2 | 2 |
| 5.7  | 8.9  | 2 | 2 |
| 1.2  | 3.6  | 2 | 2 |
| 9.5  | 11.3 | 2 | 2 |
| 6    | 8.5  | 2 | 2 |
| 9.8  | 12.1 | 2 | 2 |

|       |      |   |   |
|-------|------|---|---|
| 13.2  | 17.3 | 2 | 2 |
| 9.6   | 16.8 | 1 | 2 |
| 5.6   | 8.5  | 2 | 2 |
| 5     | 10   | 2 | 1 |
| 4     | 8    | 2 | 2 |
| 14    | 18   | 2 | 1 |
| 6     | 8    | 2 | 2 |
| 5     | 8    | 2 | 2 |
| 10    | 22   | 2 | 1 |
| 6.5   | 9    | 2 | 1 |
| 11    | 13   | 1 | 1 |
| 11    | 14   | 2 | 2 |
| 6.6   | 7.4  | 2 | 2 |
| 8.5   | 11.3 | 2 | 2 |
| 7     | 10   | 2 | 1 |
| 6     | 7    | 2 | 2 |
| 6     | 5    | 2 | 2 |
| 8     | 9    | 2 | 2 |
| 4.5   | 8    | 2 | 2 |
| 14    | 17   | 2 | 2 |
| 8     | 14   | 2 | 2 |
| 7     | 11   | 2 | 2 |
| 10.11 | 18.1 | 2 | 2 |
| 4     | 8    | 2 | 2 |
| 8     | 12   | 2 | 2 |
| 9     | 13   | 2 | 2 |
| 4     | 6    | 2 | 2 |
| 8     | 11   | 2 | 1 |
| 12.6  | 15   | 2 | 2 |
| 7.5   | 7.6  | 2 | 2 |
| 5     | 10   | 2 | 2 |
| 3.5   | 5.1  | 2 | 2 |
| 4.8   | 16.8 | 2 | 2 |
| 6.5   | 8.4  | 2 | 2 |
| 5.4   | 8.9  | 2 | 2 |
| 6     | 8.4  | 2 | 2 |
| 8     | 13   | 2 | 2 |
| 5.7   | 15   | 2 | 2 |
| 5.1   | 7.4  | 2 | 2 |
| 8     | 10   | 2 | 2 |
| 9     | 11   | 2 | 1 |
| 8     | 11   | 2 | 2 |
| 6     | 8    | 2 | 2 |
| 9     | 10   | 2 | 2 |
| 10    | 13   | 2 | 2 |
| 9     | 11   | 1 | 2 |
| 11    | 14   | 2 | 2 |
| 10    | 13   | 2 | 1 |
| 8     | 11   | 2 | 2 |
| 5     | 8    | 2 | 2 |

|       |       |   |   |
|-------|-------|---|---|
| 9     | 11    | 2 | 2 |
| 9     | 11    | 1 | 2 |
| 6     | 11    | 2 | 2 |
| 5     | 9     | 2 | 2 |
| 6     | 8     | 2 | 2 |
| 10    | 14    | 2 | 1 |
| 10    | 14    | 2 | 2 |
| 5     | 6     | 2 | 2 |
| 8     | 12    | 2 | 2 |
| 9     | 10    | 2 | 2 |
| 12    | 16    | 2 | 2 |
| 11    | 14    | 2 | 2 |
| 4     | 7     | 2 | 2 |
| 6     | 9     | 2 | 1 |
| 10    | 13    | 2 | 2 |
| 5     | 7     | 2 | 2 |
| 12    | 14    | 2 | 1 |
| 7     | 10    | 2 | 2 |
| 6.3   | 9     | 2 | 2 |
| 11    | 15.8  | 2 | 2 |
| 6     | 7     | 2 | 2 |
| 10    | 9     | 2 | 2 |
| 5     | 9     | 2 | 2 |
| 8     | 10    | 2 | 2 |
| 6     | 8     | 2 | 2 |
| 18    | 21    | 2 | 2 |
| 5     | 7     | 2 | 2 |
| 25    | 27    | 2 | 2 |
| 8     | 9     | 2 | 2 |
| 7     | 9     | 2 | 2 |
| 9     | 7     | 2 | 2 |
| 7     | 12    | 2 | 2 |
| 6     | 8     | 2 | 2 |
| 10    | 13    | 2 | 2 |
| 5     | 7     | 2 | 2 |
| 9     | 11    | 2 | 2 |
| 3     | 13    | 2 | 2 |
| 6     | 9     | 2 | 2 |
| 8     | 17    | 2 | 2 |
| 13    | 16    | 2 | 2 |
| 7     | 9     | 2 | 1 |
| 6     | 9     | 2 | 2 |
| 15.6  | 17.83 | 2 | 2 |
| 15.1  | 17.66 | 2 | 1 |
| 6.3   | 9.6   | 2 | 2 |
| 11.9  | 13.4  | 1 | 2 |
| 18.74 | 21.94 | 2 | 2 |
| 6.9   | 9.3   | 2 | 1 |
| 6     | 7.8   | 2 | 2 |
| 5.05  | 9.55  | 2 | 2 |

|      |       |   |   |
|------|-------|---|---|
| 13.6 | 25.66 | 2 | 1 |
| 6.3  | 7.6   | 1 | 1 |
| 11.6 | 22.2  | 2 | 2 |
| 8.22 | 15    | 2 | 2 |
| 8.9  | 11.27 | 2 | 1 |
| 8.9  | 10.1  | 2 | 2 |
| 5.3  | 7     | 2 | 2 |
| 11   | 19    | 2 | 2 |
| 9    | 14    | 2 | 1 |
| 6    | 17    | 2 | 2 |
| 14   | 18    | 2 | 1 |
| 6    | 9     | 2 | 2 |
| 15   | 22    | 2 | 2 |
| 8    | 16    | 2 | 2 |
| 13   | 21    | 2 | 2 |
| 11   | 17    | 2 | 1 |
| 5    | 7     | 2 | 2 |
| 6    | 9     | 2 | 1 |
| 17   | 21    | 2 | 1 |
| 9    | 14    | 2 | 2 |
| 11   | 22    | 1 | 2 |
| 6    | 10    | 2 | 2 |
| 14   | 21    | 2 | 2 |
| 6    | 8     | 2 | 2 |
| 8    | 15    | 2 | 2 |
| 7    | 9     | 1 | 2 |
| 13   | 16    | 1 | 1 |
| 9    | 14    | 1 | 2 |
| 6    | 10    | 2 | 2 |
| 8    | 9     | 1 | 1 |
| 16   | 24    | 2 | 2 |
| 8    | 13    | 2 | 2 |
| 8    | 15    | 1 | 1 |
| 6    | 7     | 2 | 1 |
| 9    | 15    | 1 | 2 |
| 6    | 7     | 1 | 1 |
| 6    | 7     | 2 | 1 |
| 6    | 8     | 2 | 2 |
| 18   | 20    | 2 | 2 |
| 19   | 28    | 2 | 2 |
| 17   | 26    | 1 | 2 |
| 6    | 8     | 2 | 2 |
| 14   | 22    | 2 | 2 |
| 6    | 13    | 2 | 2 |
| 12   | 17    | 2 | 1 |
| 5    | 8     | 2 | 2 |
| 6    | 9     | 2 | 2 |
| 9    | 14    | 2 | 2 |
| 7    | 9     | 2 | 2 |
| 6    | 10    | 2 | 2 |



|     |      |   |   |
|-----|------|---|---|
| 5   | 8    | 2 | 1 |
| 9   | 13   | 2 | 1 |
| 16  | 19   | 2 | 2 |
| 16  | 19   | 2 | 2 |
| 12  | 20   | 2 | 2 |
| 6   | 8    | 2 | 1 |
| 5.4 | 8.1  | 2 | 1 |
| 5.8 | 7.9  | 1 | 2 |
| 12  | 17   | 2 | 1 |
| 6.4 | 8    | 1 | 2 |
| 7   | 22   | 1 | 1 |
| 9   | 12   | 2 | 2 |
| 7   | 10   | 1 | 2 |
| 7   | 13   | 2 | 2 |
| 10  | 17   | 2 | 1 |
| 6   | 7    | 1 | 1 |
| 7.9 | 19   | 2 | 2 |
| 7   | 10   | 2 | 2 |
| 7   | 9    | 2 | 1 |
| 9   | 22   | 2 | 1 |
| 7   | 9    | 2 | 1 |
| 9   | 14   | 2 | 2 |
| 11  | 14   | 2 | 1 |
| 8.4 | 9    | 2 | 1 |
| 9   | 12   | 1 | 2 |
| 11  | 12   | 2 | 2 |
| 8   | 12   | 2 | 1 |
| 8   | 10   | 2 | 1 |
| 24  | 11   | 2 | 1 |
| 7   | 28   | 2 | 1 |
| 12  | 17   | 1 | 1 |
| 8   | 9    | 2 | 1 |
| 8   | 10   | 2 | 2 |
| 15  | 24   | 2 | 1 |
| 15  | 30   | 2 | 2 |
| 24  | 28   | 2 | 1 |
| 6   | 8    | 2 | 2 |
| 7   | 8    | 2 | 1 |
| 10  | 16   | 2 | 2 |
| 13  | 21   | 2 | 1 |
| 8   | 10   | 2 | 2 |
| 10  | 14   | 2 | 2 |
| 12  | 14   | 2 | 2 |
| 6   | 13   | 2 | 1 |
| 10  | 19   | 2 | 1 |
| 7.3 | 8.14 | 2 | 2 |
| 11  | 12   | 2 | 2 |
| 7   | 9    | 2 | 1 |
| 7   | 11   | 2 | 1 |
| 8   | 9    | 2 | 2 |

|      |      |   |   |
|------|------|---|---|
| 9    | 11   | 2 | 2 |
| 10   | 17   | 2 | 1 |
| 6    | 8    | 2 | 2 |
| 7    | 10   | 2 | 2 |
| 6    | 8    | 2 | 2 |
| 9    | 17   | 2 | 2 |
| 6    | 24   | 2 | 1 |
| 6.7  | 8.3  | 2 | 1 |
| 7.9  | 10.8 | 2 | 2 |
| 9.8  | 17   | 2 | 2 |
| 9.7  | 11.5 | 2 | 2 |
| 6    | 8.5  | 2 | 2 |
| 8.9  | 14.9 | 2 | 2 |
| 6.4  | 7.5  | 2 | 2 |
| 11.6 | 14.6 | 2 | 1 |
| 13.7 | 14.4 | 2 | 2 |
| 6.6  | 24   | 2 | 2 |
| 9.3  | 12.6 | 2 | 1 |
| 13.7 | 24   | 2 | 1 |
| 14.8 | 17.9 | 2 | 2 |
| 3.6  | 8.8  | 2 | 2 |
| 10.6 | 12.6 | 2 | 2 |
| 5.2  | 9.2  | 2 | 2 |
| 9.1  | 20.4 | 2 | 2 |
| 5    | 7.1  | 2 | 1 |
| 10.6 | 13.6 | 2 | 2 |
| 5.4  | 6.4  | 2 | 1 |
| 19   | 23   | 2 | 1 |
| 6.4  | 7.8  | 2 | 2 |
| 6.8  | 7.5  | 2 | 2 |
| 8.3  | 12.4 | 2 | 1 |
| 8.3  | 10.4 | 2 | 1 |
| 5.8  | 8.7  | 2 | 1 |
| 5.4  | 6    | 2 | 1 |
| 5.7  | 12.2 | 2 | 1 |
| 9.5  | 11.5 | 2 | 1 |
| 4.8  | 6.9  | 2 | 1 |
| 8.5  | 10.4 | 2 | 1 |
| 6.7  | 8.8  | 2 | 2 |
| 5.8  | 15.8 | 2 | 2 |
| 6.1  | 8.2  | 2 | 2 |
| 5.4  | 7.4  | 2 | 1 |
| 7.9  | 9.9  | 2 | 1 |
| 9.8  | 11.3 | 2 | 2 |
| 11.2 | 13.2 | 2 | 2 |
| 6.4  | 9.4  | 2 | 1 |
| 9.8  | 12.8 | 2 | 1 |
| 6.1  | 7.4  | 2 | 2 |
| 7.9  | 17.2 | 2 | 2 |
| 9.8  | 16.8 | 2 | 2 |

|      |      |   |   |
|------|------|---|---|
| 6.9  | 10   | 2 | 1 |
| 5.9  | 6    | 2 | 1 |
| 9.8  | 14.5 | 2 | 1 |
| 6.9  | 8.4  | 2 | 2 |
| 8.7  | 12   | 2 | 2 |
| 10   | 14.2 | 2 | 2 |
| 10   | 12   | 2 | 1 |
| 10.8 | 13.7 | 2 | 2 |
| 7.2  | 9.7  | 2 | 2 |
| 16.6 | 20   | 2 | 2 |
| 6.9  | 8.7  | 2 | 2 |
| 10.1 | 17.8 | 2 | 1 |
| 8.8  | 10.5 | 2 | 2 |
| 6.7  | 8.1  | 2 | 1 |
| 10.6 | 11.1 | 2 | 2 |
| 7.3  | 10.2 | 2 | 2 |
| 8.7  | 10.1 | 2 | 2 |
| 6.9  | 9.9  | 2 | 1 |
| 6.3  | 7.3  | 2 | 1 |
| 6.6  | 19.5 | 2 | 1 |
| 9.1  | 13.3 | 2 | 2 |
| 6.9  | 9.7  | 2 | 1 |
| 6.7  | 9.8  | 2 | 1 |
| 5.8  | 10.6 | 2 | 2 |
| 7.2  | 15.2 | 2 | 1 |
| 13   | 18   | 2 | 1 |
| 6.9  | 8.9  | 2 | 1 |
| 5    | 10.3 | 2 | 2 |
| 8.4  | 10.7 | 2 | 2 |
| 9.8  | 12.6 | 2 | 1 |
| 9.6  | 15.1 | 2 | 2 |
| 6.9  | 7.8  | 2 | 2 |
| 9.6  | 15   | 2 | 2 |
| 10.6 | 16.9 | 2 | 1 |
| 5    | 6.9  | 2 | 1 |
| 9.6  | 11.5 | 2 | 2 |
| 6.7  | 9    | 2 | 1 |
| 8    | 10   | 2 | 1 |
| 6    | 8.9  | 2 | 2 |
| 9    | 10   | 2 | 2 |
| 5.2  | 6    | 2 | 1 |
| 6.9  | 11.6 | 2 | 1 |
| 5.2  | 6.4  | 2 | 2 |
| 8.2  | 11.5 | 2 | 1 |
| 6.7  | 9.8  | 1 | 1 |
| 6.3  | 9.3  | 2 | 1 |
| 5.3  | 11.6 | 2 | 1 |
| 11.5 | 13.5 | 2 | 1 |
| 18.4 | 28.6 | 2 | 2 |
| 9.5  | 10.9 | 1 | 1 |

|      |      |   |   |
|------|------|---|---|
| 6.5  | 9.5  | 2 | 2 |
| 6.7  | 9.8  | 2 | 1 |
| 9.8  | 12.3 | 2 | 1 |
| 8.7  | 10.3 | 2 | 2 |
| 7.8  | 11.9 | 2 | 1 |
| 6.5  | 9.8  | 2 | 2 |
| 5.5  | 9.8  | 1 | 1 |
| 6.8  | 12.2 | 2 | 2 |
| 8.3  | 10.3 | 2 | 2 |
| 7.6  | 8.7  | 2 | 1 |
| 16.9 | 19.3 | 2 | 1 |
| 4.9  | 9.8  | 2 | 1 |
| 5.8  | 8    | 2 | 1 |
| 6.8  | 9.7  | 2 | 2 |
| 8.7  | 10.6 | 2 | 2 |
| 7.1  | 8.3  | 2 | 1 |
| 5.2  | 6.3  | 2 | 2 |
| 5.8  | 6.8  | 1 | 2 |
| 6.3  | 8.6  | 2 | 2 |
| 10.5 | 21.6 | 1 | 1 |
| 6.2  | 8.5  | 2 | 2 |
| 11.5 | 15   | 2 | 1 |
| 5.6  | 7.9  | 2 | 1 |
| 12.2 | 27.3 | 1 | 1 |
| 8.8  | 14.1 | 2 | 2 |
| 10.6 | 16   | 2 | 2 |
| 6.9  | 9    | 2 | 1 |
| 5.2  | 8.6  | 2 | 2 |
| 6.2  | 9.4  | 2 | 2 |
| 6.9  | 8.3  | 2 | 1 |
| 8.8  | 12.6 | 2 | 2 |
| 6.3  | 9.2  | 2 | 1 |
| 6.6  | 9.7  | 2 | 1 |
| 8.4  | 11.6 | 2 | 2 |
| 5.8  | 7.4  | 2 | 1 |
| 6.1  | 7.3  | 2 | 1 |
| 8.5  | 10.5 | 2 | 1 |
| 6.8  | 10   | 2 | 2 |
| 5.8  | 7    | 2 | 2 |
| 7.1  | 9.8  | 2 | 1 |
| 14.8 | 24.8 | 2 | 2 |
| 10.2 | 14.8 | 2 | 1 |
| 12.6 | 18.6 | 2 | 2 |
| 6.9  | 9.3  | 2 | 1 |
| 6.9  | 9.8  | 2 | 1 |
| 8.8  | 11.6 | 2 | 1 |
| 8.3  | 10.8 | 2 | 2 |
| 8.9  | 11.9 | 2 | 1 |
| 9.8  | 15.5 | 2 | 1 |
| 6.2  | 10.2 | 2 | 2 |

|      |      |   |   |
|------|------|---|---|
| 14   | 16   | 2 | 2 |
| 9    | 16   | 2 | 2 |
| 5.2  | 7.8  | 2 | 1 |
| 5.4  | 8.4  | 2 | 1 |
| 5.2  | 7.8  | 2 | 1 |
| 5.8  | 9.2  | 2 | 2 |
| 6.7  | 16.2 | 2 | 2 |
| 8.7  | 8.2  | 2 | 1 |
| 9.1  | 8.4  | 2 | 1 |
| 7.8  | 16.1 | 2 | 2 |
| 9.2  | 15.6 | 2 | 1 |
| 6.5  | 9.4  | 2 | 1 |
| 6.4  | 12.3 | 2 | 2 |
| 5.6  | 7.3  | 2 | 2 |
| 4.6  | 7.2  | 2 | 2 |
| 5.8  | 7.9  | 2 | 2 |
| 6.4  | 12.3 | 2 | 1 |
| 5.8  | 9.4  | 2 | 2 |
| 15.2 | 21.1 | 2 | 2 |
| 6.8  | 10.3 | 2 | 1 |
| 5.8  | 9.7  | 2 | 2 |
| 5.3  | 5.5  | 2 | 1 |
| 9.8  | 10.2 | 2 | 2 |
| 7    | 9    | 2 | 2 |
| 10   | 20.6 | 2 | 2 |
| 6.9  | 15.6 | 2 | 2 |
| 5.5  | 9.9  | 2 | 2 |
| 5.5  | 10.4 | 2 | 2 |
| 5.5  | 9.9  | 2 | 2 |
| 2.6  | 4.5  | 2 | 2 |
| 5.9  | 10.5 | 2 | 1 |
| 5.5  | 9.9  | 2 | 2 |
| 2.6  | 4.5  | 2 | 2 |
| 5.9  | 4.3  | 2 | 2 |
| 5.5  | 4.2  | 2 | 1 |
| 2.6  | 18.1 | 2 | 2 |
| 5.9  | 6.1  | 2 | 1 |
| 6.6  | 8.7  | 2 | 1 |
| 6.8  | 12.3 | 2 | 1 |
| 6.2  | 8    | 2 | 1 |
| 6.2  | 9.9  | 2 | 2 |
| 15   | 20   | 2 | 1 |
| 5.8  | 9.2  | 2 | 1 |
| 6.2  | 9.4  | 2 | 1 |
| 6.2  | 9.6  | 2 | 2 |
| 16.2 | 21.6 | 2 | 2 |
| 5.8  | 7.2  | 2 | 2 |
| 6.2  | 8.5  | 2 | 1 |
| 7    | 11   | 2 | 2 |
| 7    | 10   | 2 | 2 |

|      |      |   |   |
|------|------|---|---|
| 6    | 7    | 2 | 2 |
| 6    | 15   | 2 | 2 |
| 6    | 9    | 2 | 2 |
| 6    | 8    | 2 | 2 |
| 9    | 15   | 2 | 2 |
| 6    | 18   | 2 | 2 |
| 12   | 19   | 2 | 2 |
| 7    | 12   | 2 | 2 |
| 7    | 4    | 2 | 2 |
| 6    | 7    | 2 | 1 |
| 9    | 11   | 2 | 2 |
| 6    | 5    | 2 | 2 |
| 5.7  | 13   | 2 | 2 |
| 11.1 | 21   | 2 | 2 |
| 8.5  | 12   | 2 | 2 |
| 8    | 13   | 2 | 2 |
| 7    | 10   | 2 | 2 |
| 6    | 7    | 2 | 2 |
| 6    | 10   | 2 | 2 |
| 5    | 7    | 2 | 2 |
| 9    | 11   | 2 | 2 |
| 3    | 6    | 2 | 2 |
| 10   | 13   | 2 | 1 |
| 7    | 12   | 2 | 2 |
| 15   | 19   | 1 | 2 |
| 6    | 21   | 2 | 2 |
| 7    | 13   | 2 | 2 |
| 7    | 15   | 1 | 2 |
| 9    | 12   | 2 | 2 |
| 12   | 15   | 2 | 2 |
| 7    | 9    | 2 | 2 |
| 7    | 17   | 2 | 2 |
| 10   | 13   | 2 | 2 |
| 4.5  | 6    | 2 | 2 |
| 12   | 15   | 1 | 1 |
| 8    | 10   | 2 | 2 |
| 8.8  | 9    | 2 | 2 |
| 7    | 23   | 2 | 2 |
| 5.8  | 7.2  | 2 | 2 |
| 5.5  | 8    | 2 | 2 |
| 5.4  | 8    | 2 | 1 |
| 5    | 9    | 2 | 2 |
| 6    | 8    | 2 | 1 |
| 11   | 16   | 2 | 2 |
| 9    | 12.5 | 2 | 2 |
| 9    | 12   | 2 | 1 |
| 14   | 20   | 2 | 2 |
| 6.5  | 7    | 2 | 2 |
| 7    | 7    | 2 | 2 |
| 7    | 9    | 2 | 2 |

|      |       |   |   |
|------|-------|---|---|
| 16   | 26    | 2 | 1 |
| 4    | 6     | 2 | 2 |
| 8    | 12    | 2 | 2 |
| 5.1  | 13    | 2 | 2 |
| 6    | 10    | 2 | 1 |
| 13   | 17    | 2 | 2 |
| 3    | 6     | 2 | 1 |
| 9    | 16    | 2 | 2 |
| 8    | 10    | 2 | 1 |
| 6    | 7     | 2 | 2 |
| 12.1 | 16.2  | 2 | 2 |
| 12   | 16    | 2 | 2 |
| 7    | 10    | 2 | 2 |
| 15   | 25    | 2 | 2 |
| 6    | 6     | 2 | 2 |
| 10   | 10    | 2 | 2 |
| 8    | 10    | 2 | 2 |
| 12   | 17    | 2 | 1 |
| 8.4  | 11.6  | 2 | 2 |
| 8    | 10.8  | 2 | 2 |
| 18.3 | 24    | 2 | 2 |
| 4.8  | 6.6   | 2 | 2 |
| 5.6  | 7     | 2 | 2 |
| 7    | 9     | 2 | 2 |
| 12   | 15    | 2 | 2 |
| 16   | 18    | 2 | 2 |
| 5    | 7     | 2 | 2 |
| 10   | 13    | 2 | 2 |
| 8    | 10    | 2 | 2 |
| 7    | 9     | 2 | 2 |
| 20   | 22.6  | 2 | 2 |
| 16   | 18    | 2 | 2 |
| 3    | 7     | 2 | 1 |
| 12   | 15    | 2 | 2 |
| 20   | 24    | 2 | 2 |
| 8    | 11    | 2 | 2 |
| 8    | 10    | 2 | 2 |
| 5    | 7.2   | 2 | 2 |
| 3    | 7.5   | 2 | 2 |
| 8    | 11    | 2 | 2 |
| 24   | 28.52 | 2 | 2 |
| 3.1  | 8.6   | 2 | 2 |
| 9    | 11    | 2 | 2 |
| 9    | 11    | 2 | 2 |
| 3.1  | 4.6   | 2 | 2 |
| 10   | 11    | 2 | 2 |
| 3.1  | 8.5   | 2 | 2 |
| 5    | 6.4   | 2 | 2 |
| 15   | 17    | 1 | 2 |
| 9    | 12    | 2 | 2 |

|      |      |   |   |
|------|------|---|---|
| 10   | 11   | 2 | 2 |
| 8    | 10   | 2 | 1 |
| 10   | 11   | 2 | 2 |
| 9    | 11   | 2 | 2 |
| 4    | 8    | 2 | 2 |
| 10   | 17   | 2 | 2 |
| 11   | 14   | 2 | 2 |
| 12   | 15   | 2 | 2 |
| 5    | 6.4  | 2 | 2 |
| 10   | 12   | 2 | 2 |
| 4    | 6    | 2 | 2 |
| 18   | 22   | 2 | 2 |
| 10   | 12   | 2 | 2 |
| 8    | 11   | 2 | 2 |
| 8    | 12   | 2 | 2 |
| 7    | 9    | 2 | 2 |
| 18   | 20   | 2 | 2 |
| 15   | 17   | 2 | 2 |
| 5    | 7    | 2 | 2 |
| 6    | 9    | 2 | 2 |
| 9.8  | 14   | 2 | 2 |
| 9    | 11   | 2 | 2 |
| 5    | 7    | 2 | 2 |
| 14   | 15   | 1 | 2 |
| 17   | 21   | 1 | 1 |
| 8    | 11   | 2 | 2 |
| 6    | 7    | 2 | 2 |
| 5    | 7    | 1 | 2 |
| 5    | 8    | 2 | 2 |
| 8    | 10   | 1 | 2 |
| 11   | 15   | 2 | 2 |
| 8    | 10   | 2 | 2 |
| 6    | 9    | 2 | 2 |
| 8    | 12   | 1 | 2 |
| 7    | 9    | 2 | 2 |
| 11   | 15   | 2 | 2 |
| 17   | 19   | 2 | 2 |
| 12   | 15   | 2 | 2 |
| 4    | 6    | 2 | 2 |
| 6.2  | 8.3  | 2 | 2 |
| 4.2  | 6.4  | 2 | 1 |
| 7.8  | 9.7  | 2 | 2 |
| 6.5  | 8.2  | 2 | 1 |
| 6.7  | 9.1  | 2 | 2 |
| 6.1  | 12.4 | 2 | 2 |
| 10.5 | 15.3 | 2 | 2 |
| 10.8 | 14.6 | 2 | 2 |
| 6.2  | 8.1  | 2 | 2 |
| 6.8  | 8.1  | 1 | 2 |
| 6.2  | 9.7  | 2 | 1 |



|      |      |   |   |
|------|------|---|---|
| 5.8  | 9.7  | 2 | 2 |
| 10.8 | 18.7 | 2 | 1 |
| 5.3  | 8.5  | 1 | 2 |
| 6.3  | 7.6  | 2 | 2 |
| 18.1 | 24.1 | 2 | 2 |
| 9.8  | 15.9 | 2 | 2 |
| 5.2  | 6.3  | 2 | 2 |
| 8.8  | 15.5 | 2 | 2 |
| 8.2  | 11   | 2 | 2 |
| 6.2  | 9.9  | 1 | 1 |
| 6.2  | 9.4  | 2 | 1 |
| 6.8  | 10   | 2 | 2 |
| 6.2  | 8.5  | 2 | 2 |
| 17   | 22.7 | 2 | 2 |
| 8.9  | 10.6 | 2 | 2 |
| 6.2  | 8.8  | 2 | 2 |
| 6.1  | 7.8  | 2 | 1 |
| 9.8  | 11.5 | 2 | 2 |
| 9.1  | 12.6 | 2 | 2 |
| 17.6 | 26.4 | 2 | 2 |
| 14.2 | 18.2 | 1 | 1 |
| 6.3  | 9.5  | 2 | 1 |
| 9.8  | 13.7 | 2 | 1 |
| 6.1  | 8.4  | 2 | 2 |
| 6.7  | 11   | 2 | 2 |
| 6.2  | 10   | 2 | 2 |
| 5.8  | 7.7  | 2 | 2 |
| 10   | 12.8 | 2 | 2 |
| 5    | 6    | 2 | 2 |
| 12   | 19   | 2 | 2 |
| 8    | 17   | 2 | 2 |
| 8.7  | 6    | 2 | 2 |
| 7    | 14   | 2 | 2 |
| 7    | 9    | 1 | 2 |
| 7    | 11   | 2 | 2 |
| 5    | 8    | 2 | 1 |
| 5    | 11   | 2 | 2 |
| 9    | 13   | 2 | 2 |
| 8.6  | 7    | 2 | 2 |
| 10   | 5    | 2 | 2 |
| 10   | 5    | 2 | 2 |
| 7    | 10   | 2 | 2 |
| 9    | 14   | 2 | 2 |
| 6    | 8    | 2 | 2 |
| 7    | 10   | 2 | 2 |
| 7    | 10   | 1 | 2 |
| 12   | 14   | 2 | 2 |
| 6    | 24   | 2 | 2 |
| 16.2 | 18.9 | 2 | 2 |
| 6.2  | 9.8  | 2 | 2 |

|      |      |   |   |
|------|------|---|---|
| 8.6  | 11.9 | 2 | 2 |
| 8.9  | 13.8 | 2 | 2 |
| 5.6  | 7    | 2 | 2 |
| 10.8 | 23.8 | 2 | 2 |
| 7.4  | 10.9 | 2 | 1 |
| 11.8 | 20.2 | 2 | 1 |
| 5.2  | 7.1  | 2 | 2 |
| 6.8  | 10.1 | 2 | 2 |
| 8.7  | 11.5 | 2 | 2 |
| 5.2  | 7.6  | 2 | 2 |
| 6.7  | 8.8  | 2 | 2 |
| 7.8  | 10.4 | 2 | 2 |
| 8.5  | 21.1 | 2 | 1 |
| 6.9  | 8.8  | 2 | 2 |
| 21.2 | 24.2 | 1 | 2 |
| 12.4 | 17   | 2 | 2 |
| 10.4 | 15   | 2 | 1 |
| 6.3  | 9.4  | 2 | 1 |
| 10   | 13   | 1 | 2 |
| 10.9 | 13.8 | 2 | 2 |
| 6    | 7.7  | 2 | 1 |
| 6.7  | 10.4 | 1 | 1 |
| 5.7  | 9.3  | 2 | 2 |
| 9    | 10   | 2 | 2 |
| 10.5 | 15.4 | 2 | 2 |
| 12   | 14   | 2 | 2 |
| 5.5  | 6.6  | 2 | 2 |
| 5.8  | 8.9  | 2 | 2 |
| 9.4  | 14.3 | 2 | 2 |
| 6.2  | 9.5  | 2 | 2 |
| 9.8  | 13.3 | 2 | 2 |
| 10.1 | 14.6 | 2 | 2 |
| 6    | 11.4 | 2 | 2 |
| 6    | 8.4  | 2 | 2 |
| 6.8  | 12.5 | 2 | 2 |
| 8.9  | 13.9 | 2 | 2 |
| 10   | 12.2 | 2 | 2 |
| 16.2 | 20.5 | 2 | 1 |
| 6    | 8.8  | 2 | 2 |
| 11.6 | 19.6 | 2 | 1 |
| 8.8  | 15.6 | 2 | 1 |
| 10.8 | 15.4 | 1 | 2 |
| 11.6 | 18.2 | 2 | 2 |
| 9    | 10   | 1 | 2 |
| 6.5  | 7.9  | 1 | 1 |
| 5.4  | 6.4  | 2 | 2 |
| 4.5  | 9.3  | 2 | 1 |
| 6.1  | 7.2  | 2 | 2 |
| 5.9  | 6.5  | 2 | 2 |
| 8.9  | 11   | 2 | 1 |

---

|     |     |   |   |
|-----|-----|---|---|
| 6.6 | 7.7 | 2 | 1 |
| 5.7 | 10  | 2 | 1 |





|   |   |   |   |
|---|---|---|---|
| 1 | 2 | 2 | 1 |
| 1 | 1 | 2 | 2 |
| 2 | 1 | 2 | 2 |
| 2 | 1 | 1 | 1 |
| 2 | 1 | 2 | 1 |
| 1 | 1 | 2 | 2 |
| 2 | 1 | 2 | 1 |
| 1 | 1 | 2 | 2 |
| 1 | 1 | 2 | 1 |
| 1 | 1 | 2 | 2 |
| 1 | 1 | 2 | 1 |
| 2 | 1 | 2 | 1 |
| 2 | 1 | 2 | 1 |
| 2 | 1 | 2 | 2 |
| 2 | 1 | 2 | 1 |
| 2 | 1 | 2 | 2 |
| 1 | 1 | 2 | 1 |
| 1 | 1 | 2 | 1 |
| 2 | 1 | 1 | 1 |
| 1 | 1 | 1 | 1 |
| 2 | 1 | 1 | 1 |
| 2 | 1 | 2 | 1 |
| 2 | 1 | 2 | 1 |
| 2 | 1 | 2 | 1 |
| 2 | 1 | 2 | 1 |
| 2 | 1 | 2 | 1 |
| 2 | 1 | 2 | 1 |
| 2 | 1 | 2 | 1 |
| 1 | 1 | 2 | 1 |
| 1 | 2 | 1 | 1 |
| 1 | 1 | 2 | 1 |
| 1 | 1 | 2 | 1 |
| 1 | 1 | 2 | 1 |
| 1 | 1 | 2 | 1 |
| 1 | 1 | 1 | 1 |
| 2 | 1 | 2 | 1 |
| 1 | 1 | 2 | 1 |
| 2 | 1 | 2 | 1 |
| 2 | 1 | 2 | 1 |
| 2 | 1 | 2 | 1 |
| 2 | 1 | 2 | 1 |
| 2 | 1 | 2 | 1 |
| 2 | 1 | 2 | 1 |
| 1 | 2 | 2 | 1 |
| 2 | 2 | 2 | 1 |
| 1 | 1 | 2 | 1 |
| 2 | 1 | 2 | 1 |
| 2 | 1 | 2 | 1 |
| 2 | 1 | 2 | 1 |
| 2 | 1 | 2 | 1 |

































|   |   |   |   |
|---|---|---|---|
| 2 | 1 | 2 | 1 |
| 2 | 1 | 1 | 1 |
| 2 | 1 | 2 | 1 |
| 2 | 1 | 2 | 1 |
| 2 | 2 | 2 | 1 |
| 2 | 1 | 2 | 1 |
| 2 | 1 | 2 | 1 |
| 2 | 2 | 2 | 1 |
| 2 | 1 | 2 | 1 |
| 1 | 1 | 2 | 1 |
| 2 | 1 | 2 | 1 |
| 2 | 1 | 2 | 1 |
| 1 | 1 | 2 | 1 |
| 1 | 2 | 1 | 1 |
| 1 | 1 | 2 | 1 |
| 2 | 1 | 2 | 1 |
| 1 | 1 | 2 | 1 |
| 1 | 1 | 2 | 1 |
| 1 | 1 | 2 | 1 |
| 1 | 1 | 2 | 1 |
| 1 | 1 | 2 | 1 |
| 1 | 1 | 2 | 1 |
| 1 | 1 | 2 | 1 |
| 2 | 1 | 2 | 1 |
| 2 | 1 | 2 | 1 |
| 2 | 1 | 2 | 2 |
| 1 | 1 | 2 | 1 |
| 2 | 1 | 1 | 1 |
| 2 | 1 | 2 | 1 |
| 2 | 2 | 2 | 2 |
| 2 | 2 | 2 | 2 |
| 2 | 1 | 1 | 1 |
| 1 | 1 | 2 | 1 |
| 2 | 2 | 2 | 1 |
| 2 | 1 | 2 | 1 |
| 2 | 1 | 2 | 1 |
| 2 | 2 | 2 | 2 |
| 2 | 1 | 2 | 1 |
| 1 | 1 | 2 | 1 |
| 2 | 2 | 2 | 2 |
| 2 | 1 | 2 | 2 |
| 2 | 1 | 2 | 1 |
| 1 | 1 | 2 | 1 |
| 2 | 1 | 2 | 1 |
| 2 | 1 | 2 | 1 |
| 2 | 1 | 2 | 1 |
| 1 | 1 | 2 | 2 |
| 2 | 1 | 2 | 1 |
| 2 | 1 | 2 | 1 |
| 1 | 1 | 2 | 1 |
| 2 | 1 | 2 | 1 |
| 2 | 1 | 1 | 1 |
| 2 | 1 | 2 | 1 |















2  
2

1  
1

2  
2

1  
2

| Q75_self_foot_exam | HTN | Q53_DRetin | Q54_DNeph |
|--------------------|-----|------------|-----------|
| 2                  | 1   | 1          | 2         |
| 1                  | 2   | 2          | 2         |
| 2                  | 2   | 2          | 2         |
| 1                  | 1   | 2          | 2         |
| 1                  | 2   | 2          | 2         |
| 1                  | 2   | 2          | 2         |
| 2                  | 1   | 2          | 2         |
| 2                  | 2   | 1          | 2         |
| 1                  | 1   | 2          | 2         |
| 1                  | 2   | 2          | 2         |
| 1                  | 2   | 1          | 1         |
| 2                  | 1   | 1          | 2         |
| 2                  | 2   | 1          | 2         |
| 1                  | 1   | 1          | 2         |
| 2                  | 2   | 1          | 1         |
| 1                  | 2   | 2          | 2         |
| 2                  | 2   | 2          | 2         |
| 2                  | 2   | 1          | 2         |
| 2                  | 2   | 2          | 2         |
| 2                  | 2   | 1          | 1         |
| 2                  | 2   | 1          | 1         |
| 2                  | 2   | 2          | 2         |
| 2                  | 2   | 2          | 2         |
| 2                  | 2   | 1          | 2         |
| 2                  | 2   | 2          | 2         |
| 2                  | 2   | 1          | 1         |
| 2                  | 2   | 1          | 1         |
| 2                  | 2   | 2          | 2         |
| 1                  | 2   | 2          | 2         |
| 1                  | 2   | 1          | 2         |
| 2                  | 2   | 2          | 2         |
| 2                  | 2   | 2          | 2         |
| 1                  | 2   | 1          | 2         |
| 2                  | 2   | 2          | 2         |
| 2                  | 2   | 2          | 2         |
| 2                  | 2   | 2          | 2         |
| 2                  | 1   | 1          | 2         |
| 1                  | 1   | 2          | 2         |
| 2                  | 2   | 1          | 2         |
| 1                  | 1   | 2          | 2         |
| 2                  | 2   | 1          | 1         |
| 1                  | 2   | 1          | 2         |
| 2                  | 1   | 1          | 2         |

|   |   |   |   |
|---|---|---|---|
| 2 | 1 | 1 | 2 |
| 1 | 2 | 1 | 2 |
| 2 | 2 | 2 | 2 |
| 2 | 1 | 2 | 2 |
| 1 | 2 | 2 | 1 |
| 2 | 2 | 2 | 2 |
| 2 | 2 | 2 | 2 |
| 1 | 2 | 2 | 2 |
| 1 | 2 | 2 | 2 |
| 2 | 1 | 1 | 2 |
| 2 | 2 | 1 | 2 |
| 1 | 2 | 2 | 2 |
| 2 | 2 | 2 | 2 |
| 1 | 2 | 2 | 2 |
| 2 | 1 | 2 | 1 |
| 2 | 2 | 1 | 2 |
| 1 | 2 | 2 | 2 |
| 1 | 1 | 2 | 2 |
| 2 | 2 | 2 | 2 |
| 2 | 2 | 1 | 1 |
| 1 | 2 | 2 | 2 |
| 2 | 2 | 2 | 2 |
| 2 | 2 | 2 | 2 |
| 1 | 2 | 2 | 2 |
| 2 | 2 | 1 | 1 |
| 1 | 2 | 2 | 2 |
| 2 | 2 | 2 | 2 |
| 1 | 2 | 2 | 2 |
| 1 | 2 | 2 | 2 |
| 1 | 1 | 2 | 2 |
| 1 | 2 | 2 | 2 |
| 1 | 2 | 2 | 2 |
| 1 | 2 | 2 | 2 |
| 1 | 2 | 2 | 2 |
| 1 | 1 | 1 | 2 |
| 1 | 1 | 1 | 2 |
| 1 | 2 | 1 | 2 |
| 2 | 1 | 2 | 2 |
| 2 | 2 | 1 | 2 |
| 2 | 2 | 1 | 2 |
| 1 | 1 | 2 | 2 |



|   |   |   |   |
|---|---|---|---|
| 2 | 2 | 2 | 2 |
| 2 | 1 | 2 | 1 |
| 2 | 2 | 2 | 2 |
| 2 | 2 | 2 | 2 |
| 2 | 2 | 1 | 2 |
| 2 | 1 | 2 | 2 |
| 2 | 1 | 2 | 1 |
| 2 | 2 | 2 | 2 |
| 2 | 2 | 2 | 2 |
| 2 | 2 | 2 | 2 |
| 2 | 1 | 2 | 2 |
| 1 | 2 | 2 | 2 |
| 2 | 2 | 2 | 2 |
| 1 | 2 | 2 | 2 |
| 2 | 1 | 2 | 2 |
| 1 | 2 | 2 | 2 |
| 1 | 1 | 1 | 2 |
| 2 | 2 | 2 | 2 |
| 2 | 1 | 2 | 2 |
| 2 | 2 | 2 | 2 |
| 2 | 2 | 2 | 2 |
| 2 | 2 | 1 | 2 |
| 2 | 1 | 2 | 2 |
| 2 | 2 | 2 | 2 |
| 1 | 1 | 2 | 2 |
| 2 | 2 | 2 | 1 |
| 1 | 1 | 2 | 2 |
| 2 | 2 | 2 | 2 |
| 2 | 2 | 2 | 2 |
| 2 | 2 | 2 | 2 |
| 2 | 2 | 2 | 2 |
| 1 | 2 | 2 | 1 |
| 2 | 2 | 2 | 2 |
| 1 | 1 | 1 | 2 |
| 1 | 2 | 2 | 2 |
| 2 | 2 | 2 | 2 |
| 2 | 2 | 2 | 2 |
| 2 | 2 | 2 | 2 |
| 2 | 2 | 2 | 2 |
| 1 | 2 | 2 | 2 |
| 2 | 2 | 2 | 2 |
| 2 | 2 | 2 | 2 |
| 2 | 2 | 2 | 2 |
| 2 | 2 | 2 | 2 |
| 1 | 2 | 2 | 2 |
| 1 | 2 | 2 | 2 |
| 1 | 2 | 2 | 2 |
| 2 | 2 | 2 | 2 |
| 2 | 2 | 2 | 2 |
| 2 | 2 | 2 | 2 |
| 1 | 2 | 1 | 2 |





|   |   |   |   |
|---|---|---|---|
| 2 | 2 | 1 | 2 |
| 1 | 2 | 1 | 2 |
| 1 | 2 | 2 | 2 |
| 1 | 2 | 2 | 2 |
| 2 | 2 | 2 | 2 |
| 1 | 1 | 2 | 2 |
| 1 | 2 | 2 | 2 |
| 2 | 2 | 2 | 2 |
| 1 | 2 | 2 | 2 |
| 2 | 2 | 2 | 2 |
| 1 | 1 | 1 | 2 |
| 1 | 2 | 1 | 2 |
| 1 | 2 | 2 | 2 |
| 1 | 2 | 2 | 2 |
| 1 | 2 | 2 | 2 |
| 2 | 2 | 2 | 2 |
| 1 | 1 | 2 | 2 |
| 1 | 2 | 2 | 2 |
| 1 | 2 | 2 | 2 |
| 2 | 2 | 2 | 2 |
| 2 | 2 | 2 | 2 |
| 2 | 1 | 2 | 2 |
| 2 | 2 | 2 | 2 |
| 2 | 1 | 2 | 1 |
| 2 | 2 | 2 | 2 |
| 2 | 2 | 2 | 2 |
| 2 | 2 | 2 | 2 |
| 1 | 1 | 2 | 2 |
| 1 | 1 | 2 | 2 |
| 2 | 2 | 2 | 1 |
| 1 | 2 | 2 | 2 |
| 1 | 1 | 2 | 2 |
| 1 | 2 | 2 | 2 |
| 1 | 1 | 2 | 2 |
| 1 | 2 | 2 | 2 |
| 2 | 2 | 2 | 2 |
| 2 | 2 | 1 | 1 |
| 1 | 2 | 2 | 2 |
| 2 | 2 | 1 | 1 |
| 2 | 2 | 2 | 2 |
| 2 | 2 | 1 | 1 |
| 1 | 2 | 1 | 2 |
| 1 | 2 | 2 | 2 |
| 1 | 2 | 2 | 2 |
| 2 | 2 | 2 | 2 |
| 2 | 2 | 2 | 2 |

|   |   |   |   |
|---|---|---|---|
| 1 | 1 | 2 | 2 |
| 1 | 2 | 2 | 2 |
| 1 | 2 | 1 | 1 |
| 1 | 2 | 2 | 2 |
| 1 | 2 | 1 | 1 |
| 1 | 2 | 1 | 2 |
| 2 | 1 | 2 | 2 |
| 1 | 2 | 2 | 2 |
| 2 | 2 | 2 | 2 |
| 1 | 1 | 1 | 2 |
| 1 | 2 | 1 | 2 |
| 1 | 2 | 1 | 2 |
| 1 | 2 | 1 | 2 |
| 2 | 2 | 2 | 2 |
| 1 | 2 | 1 | 2 |
| 1 | 2 | 2 | 2 |
| 1 | 2 | 2 | 2 |
| 2 | 2 | 2 | 2 |
| 1 | 1 | 2 | 2 |
| 1 | 2 | 1 | 2 |
| 1 | 2 | 1 | 2 |
| 1 | 2 | 2 | 2 |
| 2 | 1 | 2 | 2 |
| 1 | 2 | 2 | 2 |
| 1 | 2 | 2 | 1 |
| 1 | 2 | 2 | 2 |
| 1 | 2 | 2 | 2 |
| 1 | 2 | 2 | 2 |
| 1 | 2 | 2 | 2 |
| 1 | 2 | 2 | 2 |
| 1 | 2 | 2 | 2 |
| 1 | 2 | 2 | 2 |
| 1 | 2 | 2 | 2 |
| 1 | 2 | 2 | 2 |
| 2 | 2 | 2 | 2 |
| 1 | 2 | 2 | 2 |
| 1 | 2 | 1 | 2 |
| 2 | 1 | 2 | 2 |
| 2 | 1 | 2 | 2 |
| 2 | 2 | 2 | 2 |
| 2 | 2 | 2 | 2 |









|   |   |   |   |
|---|---|---|---|
| 2 | 2 | 2 | 1 |
| 1 | 2 | 2 | 2 |
| 1 | 1 | 2 | 2 |
| 2 | 1 | 1 | 2 |
| 1 | 2 | 2 | 2 |
| 1 | 2 | 2 | 2 |
| 2 | 1 | 2 | 2 |
| 1 | 1 | 2 | 2 |
| 1 | 2 | 1 | 2 |
| 1 | 1 | 2 | 2 |
| 2 | 1 | 2 | 2 |
| 1 | 1 | 2 | 2 |
| 1 | 2 | 2 | 2 |
| 2 | 2 | 2 | 2 |
| 2 | 2 | 2 | 2 |
| 2 | 2 | 2 | 2 |
| 2 | 1 | 2 | 2 |
| 1 | 1 | 2 | 2 |
| 1 | 1 | 2 | 2 |
| 1 | 2 | 2 | 2 |
| 2 | 2 | 2 | 2 |
| 1 | 2 | 2 | 2 |
| 1 | 2 | 2 | 2 |
| 2 | 1 | 2 | 2 |
| 2 | 1 | 2 | 2 |
| 2 | 1 | 2 | 2 |
| 2 | 2 | 2 | 2 |
| 2 | 2 | 2 | 2 |
| 1 | 2 | 2 | 2 |
| 1 | 2 | 2 | 2 |
| 2 | 2 | 2 | 2 |
| 2 | 1 | 2 | 2 |
| 2 | 2 | 2 | 2 |
| 2 | 2 | 2 | 2 |
| 2 | 1 | 1 | 2 |
| 2 | 2 | 2 | 2 |
| 2 | 2 | 2 | 2 |
| 1 | 2 | 2 | 2 |
| 1 | 2 | 2 | 2 |



|   |   |   |   |
|---|---|---|---|
| 2 | 2 | 2 | 2 |
| 1 | 2 | 2 | 2 |
| 2 | 1 | 2 | 2 |
| 1 | 2 | 2 | 2 |
| 1 | 2 | 2 | 2 |
| 1 | 1 | 1 | 1 |
| 1 | 2 | 2 | 2 |
| 1 | 2 | 2 | 2 |
| 2 | 2 | 2 | 1 |
| 1 | 2 | 2 | 2 |
| 1 | 2 | 2 | 2 |
| 1 | 2 | 2 | 2 |
| 2 | 1 | 1 | 2 |
| 1 | 2 | 2 | 2 |
| 2 | 2 | 2 | 2 |
| 2 | 2 | 2 | 2 |
| 2 | 2 | 2 | 2 |
| 2 | 2 | 2 | 2 |
| 2 | 2 | 2 | 2 |
| 2 | 2 | 2 | 2 |
| 2 | 1 | 2 | 2 |
| 2 | 1 | 2 | 2 |
| 2 | 1 | 2 | 2 |
| 2 | 1 | 2 | 2 |
| 1 | 2 | 2 | 2 |
| 2 | 2 | 2 | 2 |
| 1 | 2 | 2 | 2 |
| 2 | 2 | 2 | 2 |
| 2 | 2 | 2 | 2 |
| 2 | 2 | 2 | 2 |
| 2 | 2 | 2 | 2 |
| 2 | 2 | 2 | 2 |
| 2 | 2 | 2 | 2 |
| 2 | 1 | 2 | 2 |
| 2 | 2 | 2 | 2 |
| 1 | 2 | 2 | 2 |
| 1 | 2 | 2 | 2 |
| 1 | 1 | 2 | 2 |
| 1 | 2 | 2 | 2 |
| 1 | 2 | 2 | 2 |
| 1 | 2 | 2 | 2 |
| 2 | 2 | 2 | 2 |
| 1 | 2 | 2 | 2 |
| 1 | 2 | 2 | 2 |
| 1 | 2 | 2 | 2 |
| 1 | 1 | 2 | 2 |
| 1 | 2 | 2 | 2 |
| 2 | 2 | 2 | 2 |
| 2 | 2 | 2 | 2 |
| 2 | 2 | 2 | 2 |
| 2 | 2 | 2 | 2 |
| 2 | 1 | 2 | 2 |



|   |   |   |   |
|---|---|---|---|
| 2 | 2 | 2 | 2 |
| 1 | 2 | 2 | 2 |
| 2 | 2 | 2 | 2 |
| 2 | 2 | 2 | 2 |
| 1 | 2 | 2 | 2 |
| 2 | 2 | 2 | 2 |
| 1 | 1 | 2 | 2 |
| 2 | 1 | 2 | 2 |
| 1 | 1 | 2 | 2 |
| 2 | 2 | 2 | 2 |
| 1 | 1 | 2 | 2 |
| 2 | 1 | 2 | 2 |
| 2 | 2 | 2 | 2 |
| 2 | 2 | 2 | 2 |
| 2 | 2 | 2 | 2 |
| 1 | 2 | 2 | 2 |
| 2 | 2 | 2 | 2 |
| 2 | 2 | 1 | 2 |
| 2 | 1 | 2 | 2 |
| 1 | 2 | 1 | 2 |
| 2 | 1 | 1 | 2 |
| 1 | 1 | 2 | 2 |
| 2 | 1 | 2 | 2 |
| 2 | 1 | 2 | 2 |
| 2 | 1 | 2 | 2 |
| 2 | 1 | 2 | 2 |
| 1 | 2 | 2 | 2 |
| 1 | 1 | 2 | 2 |
| 2 | 2 | 2 | 2 |
| 1 | 2 | 2 | 2 |
| 1 | 1 | 2 | 2 |
| 1 | 1 | 2 | 2 |
| 2 | 2 | 2 | 2 |
| 2 | 2 | 2 | 2 |
| 2 | 1 | 2 | 2 |
| 1 | 2 | 2 | 2 |
| 1 | 2 | 2 | 2 |
| 1 | 2 | 2 | 2 |
| 2 | 1 | 2 | 2 |
| 2 | 1 | 2 | 2 |
| 2 | 1 | 2 | 2 |
| 1 | 2 | 2 | 2 |
| 2 | 2 | 2 | 2 |
| 1 | 2 | 2 | 2 |
| 1 | 1 | 2 | 2 |
| 2 | 2 | 2 | 2 |
| 2 | 2 | 2 | 2 |
| 2 | 2 | 2 | 2 |
| 2 | 2 | 2 | 2 |
| 2 | 2 | 2 | 2 |







|   |   |   |   |
|---|---|---|---|
| 1 | 1 | 2 | 2 |
| 2 | 2 | 2 | 2 |
| 1 | 1 | 2 | 2 |
| 2 | 1 | 2 | 2 |
| 2 | 2 | 2 | 2 |
| 1 | 1 | 2 | 1 |
| 2 | 2 | 2 | 2 |
| 2 | 1 | 2 | 2 |
| 2 | 2 | 2 | 2 |
| 2 | 2 | 2 | 2 |
| 2 | 1 | 2 | 2 |
| 2 | 2 | 2 | 2 |
| 1 | 2 | 2 | 2 |
| 1 | 2 | 2 | 2 |
| 1 | 2 | 2 | 2 |
| 1 | 1 | 2 | 2 |
| 2 | 2 | 2 | 2 |
| 2 | 2 | 2 | 2 |
| 2 | 2 | 2 | 1 |
| 2 | 2 | 2 | 2 |
| 2 | 2 | 2 | 2 |
| 1 | 1 | 2 | 2 |
| 1 | 1 | 2 | 2 |
| 2 | 2 | 2 | 2 |
| 1 | 1 | 2 | 2 |
| 1 | 2 | 2 | 2 |
| 2 | 1 | 2 | 2 |
| 2 | 2 | 1 | 2 |
| 2 | 2 | 2 | 2 |
| 2 | 2 | 2 | 2 |
| 2 | 2 | 2 | 2 |
| 2 | 2 | 2 | 2 |
| 2 | 2 | 2 | 2 |
| 1 | 1 | 2 | 2 |
| 2 | 2 | 2 | 2 |
| 2 | 1 | 2 | 2 |
| 2 | 2 | 2 | 2 |
| 2 | 2 | 2 | 2 |
| 2 | 2 | 2 | 2 |
| 2 | 2 | 2 | 2 |
| 1 | 2 | 2 | 2 |
| 1 | 2 | 2 | 2 |
| 1 | 2 | 2 | 2 |
| 2 | 1 | 2 | 2 |
| 1 | 2 | 2 | 2 |
| 1 | 2 | 1 | 2 |
| 2 | 2 | 2 | 2 |
| 2 | 1 | 2 | 2 |
| 1 | 2 | 1 | 2 |
| 1 | 2 | 2 | 2 |

|   |   |   |   |
|---|---|---|---|
| 1 | 2 | 2 | 2 |
| 1 | 2 | 2 | 2 |
| 2 | 2 | 2 | 2 |
| 1 | 1 | 2 | 2 |
| 2 | 1 | 2 | 2 |
| 2 | 2 | 2 | 2 |
| 2 | 2 | 2 | 2 |
| 1 | 2 | 1 | 2 |
| 1 | 2 | 2 | 2 |
| 2 | 2 | 2 | 1 |
| 1 | 2 | 2 | 2 |
| 2 | 2 | 2 | 2 |
| 2 | 1 | 2 | 2 |
| 1 | 2 | 2 | 2 |
| 2 | 2 | 2 | 2 |
| 1 | 2 | 2 | 2 |
| 1 | 1 | 2 | 2 |
| 2 | 2 | 2 | 2 |
| 2 | 2 | 2 | 2 |
| 1 | 2 | 2 | 2 |
| 1 | 2 | 2 | 2 |
| 1 | 2 | 1 | 2 |
| 1 | 2 | 2 | 2 |
| 2 | 2 | 2 | 2 |
| 2 | 2 | 2 | 2 |
| 1 | 2 | 2 | 2 |
| 1 | 2 | 2 | 2 |
| 1 | 2 | 2 | 2 |
| 1 | 2 | 2 | 2 |
| 1 | 1 | 2 | 2 |
| 2 | 1 | 2 | 2 |
| 1 | 2 | 2 | 2 |
| 1 | 2 | 2 | 2 |
| 1 | 2 | 2 | 2 |
| 1 | 2 | 2 | 2 |
| 1 | 2 | 2 | 2 |
| 1 | 2 | 2 | 2 |
| 1 | 2 | 2 | 2 |
| 2 | 2 | 2 | 2 |
| 1 | 2 | 2 | 2 |
| 1 | 2 | 2 | 2 |
| 1 | 2 | 2 | 2 |
| 1 | 1 | 2 | 2 |
| 1 | 2 | 2 | 2 |
| 1 | 1 | 2 | 2 |
| 1 | 2 | 2 | 2 |
| 1 | 1 | 2 | 2 |
| 1 | 1 | 2 | 2 |









|   |   |   |   |
|---|---|---|---|
| 1 | 2 | 2 | 2 |
| 2 | 2 | 2 | 2 |
| 2 | 2 | 2 | 2 |
| 2 | 2 | 2 | 2 |
| 2 | 2 | 2 | 2 |
| 2 | 2 | 2 | 2 |
| 2 | 2 | 2 | 2 |
| 2 | 1 | 2 | 2 |
| 2 | 2 | 2 | 2 |
| 2 | 1 | 2 | 2 |
| 2 | 2 | 2 | 2 |
| 1 | 2 | 2 | 2 |
| 2 | 2 | 2 | 1 |
| 2 | 2 | 2 | 2 |
| 1 | 2 | 2 | 2 |
| 2 | 2 | 2 | 2 |
| 1 | 2 | 2 | 2 |
| 2 | 2 | 2 | 2 |
| 2 | 1 | 1 | 2 |
| 2 | 2 | 2 | 1 |
| 2 | 2 | 2 | 2 |
| 2 | 1 | 2 | 2 |
| 2 | 2 | 2 | 2 |
| 1 | 2 | 2 | 1 |
| 2 | 2 | 2 | 2 |
| 2 | 1 | 2 | 2 |
| 1 | 2 | 2 | 1 |
| 2 | 2 | 2 | 2 |
| 2 | 2 | 2 | 2 |
| 2 | 2 | 2 | 2 |
| 2 | 2 | 2 | 2 |
| 2 | 2 | 2 | 2 |
| 2 | 2 | 2 | 2 |
| 2 | 2 | 2 | 2 |
| 2 | 2 | 2 | 2 |
| 1 | 2 | 2 | 2 |
| 1 | 2 | 2 | 2 |
| 2 | 1 | 2 | 2 |
| 1 | 2 | 2 | 2 |
| 2 | 1 | 2 | 2 |
| 1 | 2 | 2 | 2 |
| 2 | 2 | 2 | 2 |
| 1 | 2 | 2 | 2 |
| 2 | 2 | 2 | 2 |
| 2 | 1 | 2 | 2 |
| 2 | 1 | 2 | 2 |
| 1 | 2 | 2 | 2 |
| 2 | 2 | 2 | 2 |
| 1 | 1 | 2 | 1 |
| 2 | 1 | 2 | 2 |
| 1 | 2 | 2 | 2 |
| 2 | 1 | 2 | 2 |

|   |   |   |   |
|---|---|---|---|
| 1 | 2 | 2 | 2 |
| 2 | 1 | 2 | 1 |

| PN | PAD | Deformity | HO_Amputation |
|----|-----|-----------|---------------|
| 1  | 2   | 1         | 2             |
| 2  | 2   | 1         | 2             |
| 2  | 2   | 2         | 2             |
| 1  | 2   | 1         | 2             |
| 2  | 2   | 1         | 2             |
| 2  | 2   | 2         | 2             |
| 2  | 2   | 1         | 2             |
| 1  | 2   | 2         | 1             |
| 2  | 2   | 1         | 2             |
| 2  | 2   | 2         | 2             |
| 1  | 2   | 2         | 2             |
| 1  | 2   | 2         | 2             |
| 1  | 2   | 2         | 2             |
| 2  | 2   | 2         | 2             |
| 2  | 2   | 1         | 2             |
| 2  | 2   | 1         | 2             |
| 2  | 2   | 2         | 2             |
| 2  | 2   | 1         | 2             |
| 2  | 2   | 2         | 2             |
| 2  | 2   | 1         | 1             |
| 2  | 2   | 2         | 1             |
| 1  | 2   | 1         | 2             |
| 2  | 2   | 2         | 2             |
| 2  | 2   | 2         | 2             |
| 1  | 2   | 2         | 2             |
| 2  | 2   | 2         | 2             |
| 2  | 2   | 1         | 2             |
| 2  | 2   | 2         | 2             |
| 2  | 2   | 1         | 2             |
| 2  | 2   | 2         | 2             |
| 2  | 2   | 1         | 2             |
| 2  | 2   | 2         | 2             |
| 2  | 2   | 1         | 2             |
| 2  | 2   | 2         | 2             |
| 2  | 2   | 2         | 2             |
| 2  | 2   | 2         | 2             |
| 2  | 2   | 2         | 2             |
| 2  | 2   | 1         | 2             |
| 2  | 2   | 1         | 2             |
| 2  | 2   | 1         | 1             |
| 2  | 2   | 2         | 2             |
| 2  | 2   | 2         | 1             |









|   |   |   |   |
|---|---|---|---|
| 2 | 2 | 1 | 1 |
| 1 | 2 | 1 | 2 |
| 2 | 2 | 2 | 2 |
| 2 | 2 | 1 | 2 |
| 2 | 2 | 1 | 2 |
| 1 | 2 | 1 | 1 |
| 2 | 2 | 1 | 2 |
| 2 | 2 | 1 | 2 |
| 2 | 2 | 1 | 2 |
| 2 | 2 | 1 | 1 |
| 2 | 2 | 1 | 2 |
| 1 | 2 | 1 | 2 |
| 2 | 2 | 1 | 2 |
| 2 | 2 | 2 | 2 |
| 2 | 2 | 1 | 2 |
| 1 | 2 | 1 | 2 |
| 2 | 2 | 1 | 2 |
| 1 | 2 | 2 | 2 |
| 2 | 2 | 1 | 2 |
| 1 | 2 | 1 | 2 |
| 2 | 2 | 1 | 2 |
| 2 | 2 | 1 | 2 |
| 2 | 2 | 1 | 2 |
| 2 | 2 | 2 | 2 |
| 2 | 2 | 2 | 2 |
| 1 | 2 | 2 | 2 |
| 1 | 2 | 1 | 2 |
| 2 | 2 | 1 | 2 |
| 2 | 2 | 1 | 2 |
| 2 | 2 | 1 | 2 |
| 2 | 2 | 1 | 2 |
| 2 | 2 | 2 | 2 |
| 2 | 2 | 2 | 2 |
| 2 | 2 | 1 | 2 |
| 2 | 2 | 1 | 2 |
| 2 | 2 | 1 | 2 |
| 2 | 2 | 1 | 2 |
| 2 | 2 | 1 | 2 |
| 2 | 2 | 1 | 2 |
| 2 | 2 | 2 | 2 |
| 2 | 2 | 1 | 2 |
| 2 | 2 | 1 | 2 |
| 2 | 2 | 1 | 1 |
| 2 | 2 | 2 | 1 |
| 2 | 2 | 1 | 2 |
| 2 | 2 | 1 | 2 |
| 2 | 2 | 1 | 2 |
| 2 | 2 | 2 | 2 |
| 2 | 2 | 1 | 2 |
| 2 | 2 | 1 | 2 |
| 2 | 2 | 1 | 2 |
| 2 | 2 | 2 | 2 |
| 2 | 2 | 1 | 2 |
| 2 | 2 | 1 | 2 |
| 2 | 2 | 2 | 2 |
| 2 | 2 | 1 | 2 |
| 2 | 2 | 1 | 2 |
| 2 | 2 | 2 | 2 |





|   |   |   |   |
|---|---|---|---|
| 1 | 2 | 1 | 2 |
| 1 | 2 | 1 | 2 |
| 2 | 2 | 1 | 2 |
| 2 | 2 | 2 | 2 |
| 1 | 2 | 1 | 2 |
| 2 | 2 | 1 | 2 |
| 2 | 2 | 1 | 2 |
| 2 | 2 | 1 | 2 |
| 2 | 2 | 1 | 2 |
| 1 | 2 | 1 | 2 |
| 2 | 2 | 1 | 2 |
| 2 | 2 | 1 | 2 |
| 1 | 2 | 1 | 1 |
| 1 | 2 | 1 | 2 |
| 1 | 2 | 1 | 2 |
| 2 | 2 | 2 | 2 |
| 1 | 2 | 1 | 2 |
| 1 | 2 | 1 | 1 |
| 1 | 2 | 1 | 1 |
| 2 | 2 | 1 | 2 |
| 1 | 2 | 1 | 2 |
| 1 | 2 | 1 | 2 |
| 2 | 2 | 1 | 2 |
| 2 | 2 | 1 | 2 |
| 2 | 2 | 1 | 2 |
| 1 | 2 | 1 | 2 |
| 2 | 2 | 1 | 1 |
| 2 | 2 | 1 | 2 |
| 1 | 2 | 1 | 2 |
| 2 | 2 | 1 | 2 |
| 2 | 2 | 2 | 2 |
| 2 | 2 | 2 | 2 |
| 2 | 2 | 2 | 2 |
| 2 | 2 | 2 | 2 |
| 2 | 2 | 1 | 2 |
| 1 | 2 | 2 | 2 |
| 2 | 2 | 2 | 1 |
| 2 | 2 | 2 | 2 |
| 2 | 2 | 1 | 2 |
| 1 | 2 | 1 | 2 |
| 2 | 2 | 1 | 2 |
| 2 | 2 | 1 | 2 |
| 2 | 2 | 2 | 2 |
| 2 | 2 | 2 | 2 |
| 2 | 2 | 1 | 2 |
| 1 | 2 | 2 | 2 |
| 2 | 2 | 2 | 2 |
| 2 | 2 | 2 | 2 |
| 2 | 2 | 2 | 1 |
| 2 | 2 | 1 | 2 |
| 2 | 2 | 2 | 2 |
| 2 | 2 | 2 | 2 |













|   |   |   |   |
|---|---|---|---|
| 1 | 2 | 1 | 2 |
| 2 | 2 | 1 | 2 |
| 2 | 2 | 1 | 1 |
| 1 | 2 | 1 | 2 |
| 2 | 2 | 1 | 2 |
| 2 | 2 | 1 | 2 |
| 2 | 2 | 2 | 2 |
| 2 | 2 | 2 | 2 |
| 2 | 2 | 1 | 2 |
| 2 | 2 | 1 | 2 |
| 1 | 2 | 1 | 2 |
| 2 | 2 | 1 | 2 |
| 2 | 2 | 1 | 2 |
| 2 | 2 | 2 | 2 |
| 2 | 2 | 2 | 2 |
| 2 | 2 | 1 | 2 |
| 2 | 2 | 1 | 2 |
| 2 | 2 | 1 | 2 |
| 2 | 2 | 1 | 2 |
| 2 | 2 | 1 | 2 |
| 2 | 2 | 2 | 2 |
| 1 | 2 | 1 | 2 |
| 1 | 2 | 1 | 2 |
| 1 | 2 | 1 | 2 |
| 1 | 2 | 2 | 2 |
| 2 | 2 | 1 | 2 |
| 2 | 2 | 1 | 2 |
| 2 | 2 | 1 | 2 |
| 2 | 2 | 1 | 2 |
| 2 | 2 | 1 | 2 |
| 2 | 2 | 2 | 2 |
| 2 | 2 | 2 | 2 |
| 1 | 2 | 1 | 2 |
| 2 | 2 | 1 | 2 |
| 2 | 2 | 1 | 2 |
| 2 | 2 | 1 | 2 |
| 2 | 2 | 2 | 2 |
| 2 | 2 | 2 | 2 |
| 1 | 2 | 1 | 2 |
| 2 | 2 | 1 | 2 |
| 2 | 2 | 2 | 2 |
| 2 | 2 | 1 | 2 |
| 1 | 2 | 1 | 2 |
| 2 | 2 | 2 | 2 |
| 1 | 2 | 1 | 2 |
| 2 | 2 | 1 | 2 |
| 2 | 2 | 2 | 2 |
| 2 | 2 | 1 | 2 |
| 2 | 2 | 1 | 2 |

|   |   |   |   |
|---|---|---|---|
| 2 | 2 | 1 | 2 |
| 1 | 2 | 2 | 2 |
| 2 | 2 | 1 | 2 |
| 2 | 2 | 1 | 2 |
| 2 | 2 | 2 | 2 |
| 2 | 2 | 1 | 2 |
| 2 | 2 | 1 | 2 |
| 2 | 2 | 2 | 1 |
| 1 | 2 | 2 | 2 |
| 2 | 2 | 2 | 2 |
| 2 | 2 | 1 | 1 |
| 2 | 2 | 2 | 2 |
| 1 | 2 | 1 | 2 |
| 1 | 2 | 1 | 2 |
| 2 | 2 | 1 | 2 |
| 2 | 2 | 1 | 2 |
| 2 | 2 | 1 | 2 |
| 2 | 2 | 1 | 2 |
| 2 | 2 | 1 | 2 |
| 2 | 2 | 1 | 2 |
| 2 | 2 | 2 | 1 |
| 2 | 2 | 1 | 2 |
| 2 | 2 | 2 | 2 |
| 2 | 2 | 1 | 2 |
| 2 | 2 | 2 | 2 |
| 2 | 2 | 1 | 2 |
| 2 | 2 | 2 | 2 |
| 2 | 2 | 1 | 1 |
| 2 | 2 | 2 | 2 |
| 2 | 2 | 1 | 2 |
| 2 | 2 | 1 | 2 |
| 2 | 2 | 1 | 2 |
| 2 | 2 | 2 | 2 |
| 2 | 2 | 2 | 2 |
| 2 | 2 | 1 | 2 |
| 1 | 2 | 1 | 2 |
| 2 | 2 | 1 | 2 |
| 2 | 2 | 1 | 2 |







|   |   |   |   |
|---|---|---|---|
| 2 | 2 | 2 | 2 |
| 2 | 2 | 1 | 2 |
| 2 | 2 | 1 | 2 |
| 2 | 2 | 1 | 2 |
| 2 | 2 | 1 | 2 |
| 2 | 2 | 1 | 2 |
| 2 | 2 | 1 | 2 |
| 1 | 2 | 2 | 2 |
| 2 | 2 | 1 | 2 |
| 2 | 2 | 1 | 2 |
| 2 | 2 | 1 | 2 |
| 2 | 2 | 1 | 2 |
| 1 | 2 | 2 | 2 |
| 2 | 2 | 2 | 2 |
| 2 | 2 | 1 | 2 |
| 2 | 2 | 1 | 2 |
| 2 | 2 | 1 | 2 |
| 2 | 2 | 1 | 2 |
| 2 | 2 | 2 | 1 |
| 2 | 2 | 1 | 2 |
| 1 | 2 | 1 | 2 |
| 1 | 2 | 1 | 2 |
| 2 | 2 | 1 | 2 |
| 2 | 2 | 2 | 2 |
| 2 | 2 | 1 | 1 |
| 2 | 2 | 2 | 2 |
| 2 | 2 | 1 | 2 |
| 2 | 2 | 1 | 1 |
| 2 | 2 | 1 | 2 |
| 2 | 2 | 1 | 2 |
| 2 | 2 | 1 | 2 |
| 2 | 2 | 1 | 2 |
| 2 | 2 | 1 | 2 |
| 2 | 2 | 2 | 2 |
| 2 | 2 | 2 | 2 |
| 2 | 2 | 1 | 2 |
| 2 | 2 | 1 | 2 |
| 2 | 2 | 2 | 2 |
| 2 | 2 | 2 | 2 |
| 2 | 2 | 1 | 2 |
| 2 | 2 | 1 | 2 |
| 1 | 2 | 1 | 2 |
| 2 | 2 | 2 | 1 |
| 2 | 2 | 2 | 2 |
| 1 | 2 | 2 | 2 |



|   |   |   |   |
|---|---|---|---|
| 2 | 2 | 1 | 2 |
| 2 | 2 | 1 | 2 |
| 2 | 2 | 1 | 2 |
| 2 | 2 | 1 | 2 |
| 2 | 2 | 1 | 2 |
| 2 | 2 | 1 | 2 |
| 2 | 2 | 1 | 2 |
| 2 | 2 | 1 | 2 |
| 2 | 2 | 1 | 2 |
| 1 | 2 | 1 | 2 |
| 2 | 2 | 1 | 2 |
| 1 | 2 | 1 | 2 |
| 2 | 2 | 1 | 2 |
| 2 | 2 | 1 | 2 |
| 2 | 2 | 1 | 2 |
| 2 | 2 | 1 | 2 |
| 2 | 2 | 1 | 2 |
| 2 | 2 | 2 | 2 |
| 2 | 2 | 2 | 2 |
| 1 | 2 | 1 | 2 |
| 2 | 2 | 1 | 2 |
| 1 | 2 | 1 | 2 |
| 2 | 2 | 1 | 2 |
| 2 | 2 | 1 | 2 |
| 2 | 2 | 1 | 2 |
| 1 | 2 | 1 | 2 |
| 2 | 2 | 1 | 2 |
| 2 | 2 | 1 | 2 |
| 2 | 2 | 1 | 2 |
| 2 | 2 | 1 | 2 |
| 2 | 2 | 2 | 2 |
| 2 | 2 | 1 | 2 |
| 1 | 2 | 1 | 2 |
| 2 | 2 | 2 | 2 |
| 1 | 2 | 1 | 2 |
| 2 | 2 | 2 | 2 |
| 2 | 2 | 1 | 2 |
| 2 | 2 | 1 | 2 |
| 2 | 2 | 1 | 2 |
| 2 | 2 | 1 | 2 |
| 1 | 2 | 2 | 2 |
| 2 | 2 | 1 | 2 |
| 1 | 2 | 1 | 2 |
| 2 | 2 | 2 | 2 |
| 1 | 2 | 1 | 2 |
| 2 | 2 | 1 | 2 |
| 1 | 2 | 1 | 2 |
| 2 | 2 | 2 | 2 |
| 1 | 2 | 1 | 2 |
| 2 | 2 | 1 | 2 |
| 2 | 2 | 1 | 2 |
| 1 | 2 | 1 | 2 |
| 2 | 2 | 2 | 2 |
| 1 | 2 | 1 | 2 |
| 2 | 2 | 1 | 2 |
| 2 | 2 | 1 | 2 |





|   |   |   |   |
|---|---|---|---|
| 1 | 2 | 1 | 2 |
| 1 | 2 | 1 | 2 |
| 2 | 2 | 1 | 2 |
| 1 | 2 | 1 | 2 |
| 1 | 2 | 1 | 2 |
| 1 | 2 | 1 | 2 |
| 2 | 2 | 1 | 2 |
| 2 | 2 | 1 | 2 |
| 2 | 2 | 1 | 2 |
| 2 | 2 | 1 | 2 |
| 2 | 2 | 1 | 1 |
| 1 | 2 | 1 | 2 |
| 2 | 2 | 1 | 2 |
| 1 | 2 | 1 | 2 |
| 2 | 2 | 1 | 2 |
| 2 | 2 | 1 | 2 |
| 2 | 2 | 1 | 2 |
| 2 | 2 | 1 | 2 |
| 2 | 2 | 2 | 2 |
| 2 | 2 | 1 | 2 |
| 1 | 2 | 1 | 2 |
| 2 | 2 | 1 | 2 |
| 1 | 2 | 1 | 2 |
| 2 | 2 | 1 | 2 |
| 1 | 2 | 1 | 2 |
| 2 | 2 | 1 | 2 |
| 2 | 2 | 1 | 2 |
| 2 | 2 | 1 | 2 |
| 2 | 2 | 1 | 2 |
| 2 | 2 | 1 | 2 |
| 2 | 2 | 1 | 2 |
| 1 | 2 | 1 | 2 |
| 2 | 2 | 1 | 2 |
| 2 | 2 | 1 | 2 |
| 2 | 2 | 2 | 2 |
| 1 | 2 | 2 | 2 |
| 1 | 2 | 1 | 2 |
| 2 | 2 | 1 | 2 |
| 1 | 2 | 1 | 2 |
| 2 | 2 | 1 | 2 |
| 2 | 2 | 2 | 1 |
| 2 | 2 | 1 | 2 |
| 1 | 2 | 1 | 2 |
| 1 | 2 | 1 | 2 |
| 1 | 2 | 2 | 2 |
| 2 | 2 | 2 | 2 |
| 2 | 2 | 1 | 2 |
| 2 | 2 | 2 | 2 |
| 1 | 2 | 1 | 2 |
| 2 | 2 | 2 | 2 |
| 2 | 2 | 1 | 2 |
| 1 | 2 | 1 | 2 |
| 2 | 2 | 1 | 2 |



|   |   |   |   |
|---|---|---|---|
| 2 | 2 | 1 | 2 |
| 2 | 2 | 1 | 2 |

| HO_FU | IWGDFcat | IWGDF_cat_4 |
|-------|----------|-------------|
| 2     | 21       | 2           |
| 2     | 0        | 0           |
| 2     | 0        | 0           |
| 2     | 21       | 2           |
| 2     | 0        | 0           |
| 2     | 0        | 0           |
| 2     | 0        | 0           |
| 2     | 32       | 4           |
| 2     | 0        | 0           |
| 2     | 0        | 0           |
| 2     | 1        | 1           |
| 2     | 1        | 1           |
| 2     | 1        | 1           |
| 2     | 0        | 0           |
| 2     | 0        | 0           |
| 2     | 0        | 0           |
| 1     | 31       | 3           |
| 1     | 31       | 3           |
| 2     | 0        | 0           |
| 2     | 32       | 4           |
| 2     | 32       | 4           |
| 2     | 21       | 2           |
| 2     | 0        | 0           |
| 2     | 0        | 0           |
| 2     | 1        | 1           |
| 2     | 0        | 0           |
| 2     | 0        | 0           |
| 2     | 0        | 0           |
| 2     | 0        | 0           |
| 2     | 0        | 0           |
| 2     | 0        | 0           |
| 1     | 31       | 3           |
| 2     | 0        | 0           |
| 2     | 21       | 2           |
| 2     | 0        | 0           |
| 1     | 31       | 3           |
| 2     | 0        | 0           |
| 2     | 21       | 2           |
| 1     | 31       | 3           |
| 2     | 0        | 0           |
| 2     | 0        | 0           |
| 2     | 0        | 0           |
| 1     | 31       | 3           |
| 1     | 31       | 3           |
| 2     | 0        | 0           |
| 2     | 32       | 4           |
| 2     | 0        | 0           |
| 2     | 32       | 4           |

|   |    |   |
|---|----|---|
| 2 | 32 | 4 |
| 2 | 0  | 0 |
| 2 | 0  | 0 |
| 2 | 0  | 0 |
| 2 | 1  | 1 |
| 2 | 0  | 0 |
| 2 | 0  | 0 |
| 2 | 32 | 4 |
| 2 | 21 | 2 |
| 2 | 0  | 0 |
| 1 | 31 | 3 |
| 2 | 0  | 0 |
| 2 | 32 | 4 |
| 2 | 0  | 0 |
| 2 | 0  | 0 |
| 2 | 32 | 4 |
| 1 | 32 | 4 |
| 2 | 0  | 0 |
| 2 | 0  | 0 |
| 2 | 32 | 4 |
| 2 | 1  | 1 |
| 2 | 0  | 0 |
| 2 | 32 | 4 |
| 2 | 0  | 0 |
| 2 | 0  | 0 |
| 2 | 1  | 1 |
| 2 | 0  | 0 |
| 2 | 0  | 0 |
| 2 | 0  | 0 |
| 2 | 1  | 1 |
| 2 | 0  | 0 |
| 2 | 0  | 0 |
| 2 | 1  | 1 |
| 1 | 31 | 3 |
| 2 | 0  | 0 |
| 2 | 0  | 0 |
| 2 | 0  | 0 |
| 2 | 32 | 4 |
| 1 | 31 | 3 |
| 2 | 0  | 0 |
| 2 | 0  | 0 |
| 2 | 0  | 0 |
| 2 | 0  | 0 |
| 1 | 31 | 3 |
| 2 | 21 | 2 |
| 1 | 31 | 3 |
| 2 | 0  | 0 |
| 2 | 1  | 1 |
| 2 | 0  | 0 |
| 2 | 0  | 0 |



|   |    |   |
|---|----|---|
| 2 | 0  | 0 |
| 2 | 0  | 0 |
| 2 | 0  | 0 |
| 2 | 1  | 1 |
| 2 | 0  | 0 |
| 2 | 0  | 0 |
| 2 | 32 | 4 |
| 2 | 0  | 0 |
| 2 | 0  | 0 |
| 2 | 21 | 2 |
| 2 | 0  | 0 |
| 2 | 0  | 0 |
| 2 | 0  | 0 |
| 2 | 21 | 2 |
| 2 | 21 | 2 |
| 2 | 1  | 1 |
| 2 | 0  | 0 |
| 2 | 0  | 0 |
| 2 | 0  | 0 |
| 2 | 0  | 0 |
| 2 | 0  | 0 |
| 2 | 32 | 4 |
| 1 | 32 | 4 |
| 2 | 0  | 0 |
| 2 | 0  | 0 |
| 2 | 0  | 0 |
| 2 | 0  | 0 |
| 2 | 0  | 0 |
| 2 | 21 | 2 |
| 2 | 1  | 1 |
| 2 | 0  | 0 |
| 2 | 0  | 0 |
| 2 | 0  | 0 |
| 2 | 32 | 4 |
| 2 | 0  | 0 |
| 1 | 31 | 3 |
| 2 | 21 | 2 |
| 2 | 32 | 4 |
| 2 | 1  | 1 |
| 2 | 0  | 0 |
| 2 | 0  | 0 |
| 2 | 0  | 0 |
| 2 | 0  | 0 |
| 1 | 31 | 3 |
| 2 | 0  | 0 |
| 2 | 1  | 1 |
| 2 | 0  | 0 |
| 1 | 32 | 4 |
| 2 | 32 | 4 |
| 2 | 32 | 4 |

|   |    |   |
|---|----|---|
| 2 | 0  | 0 |
| 2 | 0  | 0 |
| 1 | 31 | 3 |
| 2 | 32 | 4 |
| 1 | 31 | 3 |
| 2 | 21 | 2 |
| 1 | 31 | 3 |
| 2 | 21 | 2 |
| 2 | 21 | 2 |
| 1 | 32 | 4 |
| 1 | 31 | 3 |
| 2 | 21 | 2 |
| 2 | 0  | 0 |
| 1 | 31 | 3 |
| 2 | 0  | 0 |
| 2 | 0  | 0 |
| 2 | 0  | 0 |
| 2 | 32 | 4 |
| 2 | 21 | 2 |
| 2 | 0  | 0 |
| 2 | 21 | 2 |
| 2 | 0  | 0 |
| 2 | 0  | 0 |
| 1 | 31 | 3 |
| 1 | 32 | 4 |
| 2 | 0  | 0 |
| 2 | 21 | 2 |
| 2 | 0  | 0 |
| 2 | 0  | 0 |
| 2 | 0  | 0 |
| 2 | 0  | 0 |
| 2 | 0  | 0 |
| 2 | 0  | 0 |
| 1 | 32 | 4 |
| 1 | 31 | 3 |
| 2 | 21 | 2 |
| 2 | 0  | 0 |
| 2 | 32 | 4 |
| 2 | 0  | 0 |
| 2 | 1  | 1 |
| 2 | 0  | 0 |
| 2 | 21 | 2 |
| 2 | 0  | 0 |
| 2 | 0  | 0 |
| 2 | 0  | 0 |
| 2 | 0  | 0 |
| 2 | 0  | 0 |
| 2 | 0  | 0 |
| 2 | 0  | 0 |
| 2 | 0  | 0 |

|   |    |   |
|---|----|---|
| 2 | 32 | 4 |
| 2 | 21 | 2 |
| 2 | 0  | 0 |
| 1 | 31 | 3 |
| 2 | 0  | 0 |
| 1 | 32 | 4 |
| 2 | 0  | 0 |
| 2 | 0  | 0 |
| 2 | 32 | 4 |
| 2 | 0  | 0 |
| 1 | 31 | 3 |
| 1 | 31 | 3 |
| 2 | 0  | 0 |
| 1 | 31 | 3 |
| 2 | 21 | 2 |
| 2 | 0  | 0 |
| 2 | 1  | 1 |
| 2 | 0  | 0 |
| 2 | 21 | 2 |
| 2 | 0  | 0 |
| 2 | 0  | 0 |
| 2 | 0  | 0 |
| 2 | 0  | 0 |
| 2 | 1  | 1 |
| 2 | 21 | 2 |
| 2 | 0  | 0 |
| 2 | 0  | 0 |
| 2 | 21 | 2 |
| 2 | 21 | 2 |
| 2 | 0  | 0 |
| 2 | 0  | 0 |
| 2 | 0  | 0 |
| 2 | 0  | 0 |
| 2 | 0  | 0 |
| 2 | 0  | 0 |
| 2 | 0  | 0 |
| 2 | 0  | 0 |
| 2 | 0  | 0 |
| 2 | 0  | 0 |
| 1 | 31 | 3 |
| 2 | 0  | 0 |
| 2 | 0  | 0 |
| 2 | 0  | 0 |
| 1 | 31 | 3 |
| 2 | 32 | 4 |
| 2 | 32 | 4 |
| 2 | 0  | 0 |
| 2 | 0  | 0 |
| 2 | 0  | 0 |
| 2 | 0  | 0 |
| 2 | 0  | 0 |
| 2 | 0  | 0 |
| 2 | 0  | 0 |
| 2 | 0  | 0 |
| 2 | 0  | 0 |
| 2 | 0  | 0 |

|   |    |   |
|---|----|---|
| 2 | 32 | 4 |
| 2 | 0  | 0 |
| 1 | 31 | 3 |
| 1 | 31 | 3 |
| 2 | 0  | 0 |
| 1 | 31 | 3 |
| 2 | 0  | 0 |
| 2 | 21 | 2 |
| 2 | 0  | 0 |
| 2 | 0  | 0 |
| 2 | 0  | 0 |
| 2 | 0  | 0 |
| 1 | 31 | 3 |
| 1 | 31 | 3 |
| 2 | 21 | 2 |
| 1 | 31 | 3 |
| 2 | 0  | 0 |
| 2 | 0  | 0 |
| 2 | 0  | 0 |
| 2 | 21 | 2 |
| 2 | 21 | 2 |
| 2 | 0  | 0 |
| 1 | 31 | 3 |
| 2 | 0  | 0 |
| 2 | 0  | 0 |
| 1 | 31 | 3 |
| 1 | 31 | 3 |
| 1 | 31 | 3 |
| 2 | 0  | 0 |
| 2 | 0  | 0 |
| 2 | 0  | 0 |
| 1 | 31 | 3 |
| 1 | 31 | 3 |
| 2 | 21 | 2 |
| 1 | 31 | 3 |
| 2 | 0  | 0 |
| 2 | 0  | 0 |
| 1 | 31 | 3 |
| 1 | 31 | 3 |
| 2 | 0  | 0 |
| 1 | 31 | 3 |
| 2 | 0  | 0 |
| 2 | 0  | 0 |
| 2 | 32 | 4 |
| 2 | 0  | 0 |
| 2 | 0  | 0 |
| 2 | 32 | 4 |
| 2 | 0  | 0 |
| 1 | 31 | 3 |
| 1 | 31 | 3 |
| 2 | 0  | 0 |

|   |    |   |
|---|----|---|
| 1 | 31 | 3 |
| 2 | 0  | 0 |
| 2 | 0  | 0 |
| 2 | 0  | 0 |
| 2 | 32 | 4 |
| 1 | 31 | 3 |
| 2 | 0  | 0 |
| 1 | 32 | 4 |
| 2 | 21 | 2 |
| 2 | 0  | 0 |
| 2 | 0  | 0 |
| 2 | 0  | 0 |
| 2 | 0  | 0 |
| 2 | 0  | 0 |
| 1 | 31 | 3 |
| 2 | 32 | 4 |
| 1 | 31 | 3 |
| 2 | 0  | 0 |
| 2 | 0  | 0 |
| 1 | 32 | 4 |
| 2 | 0  | 0 |
| 1 | 31 | 3 |
| 2 | 0  | 0 |
| 2 | 32 | 4 |
| 1 | 31 | 3 |
| 2 | 1  | 1 |
| 2 | 0  | 0 |
| 2 | 21 | 2 |
| 2 | 0  | 0 |
| 2 | 32 | 4 |
| 2 | 21 | 2 |
| 2 | 21 | 2 |
| 2 | 0  | 0 |
| 1 | 32 | 4 |
| 2 | 32 | 4 |
| 1 | 31 | 3 |
| 1 | 31 | 3 |
| 1 | 31 | 3 |
| 2 | 0  | 0 |
| 2 | 0  | 0 |
| 1 | 31 | 3 |
| 2 | 0  | 0 |
| 2 | 0  | 0 |
| 2 | 21 | 2 |
| 2 | 21 | 2 |
| 2 | 0  | 0 |
| 2 | 0  | 0 |
| 2 | 0  | 0 |
| 2 | 1  | 1 |
| 2 | 21 | 2 |

|   |    |   |
|---|----|---|
| 2 | 21 | 2 |
| 2 | 21 | 2 |
| 2 | 0  | 0 |
| 2 | 0  | 0 |
| 2 | 21 | 2 |
| 2 | 0  | 0 |
| 1 | 31 | 3 |
| 2 | 0  | 0 |
| 1 | 31 | 3 |
| 2 | 21 | 2 |
| 2 | 0  | 0 |
| 1 | 31 | 3 |
| 2 | 32 | 4 |
| 2 | 21 | 2 |
| 2 | 21 | 2 |
| 2 | 0  | 0 |
| 2 | 21 | 2 |
| 2 | 32 | 4 |
| 2 | 32 | 4 |
| 2 | 0  | 0 |
| 2 | 21 | 2 |
| 2 | 21 | 2 |
| 2 | 0  | 0 |
| 2 | 0  | 0 |
| 2 | 21 | 2 |
| 2 | 32 | 4 |
| 2 | 0  | 0 |
| 2 | 21 | 2 |
| 2 | 0  | 0 |
| 2 | 0  | 0 |
| 2 | 0  | 0 |
| 2 | 0  | 0 |
| 2 | 1  | 1 |
| 2 | 32 | 4 |
| 2 | 0  | 0 |
| 2 | 0  | 0 |
| 2 | 21 | 2 |
| 2 | 0  | 0 |
| 2 | 0  | 0 |
| 1 | 31 | 3 |
| 2 | 0  | 0 |
| 1 | 31 | 3 |
| 2 | 0  | 0 |
| 2 | 1  | 1 |
| 2 | 0  | 0 |
| 2 | 0  | 0 |
| 1 | 32 | 4 |
| 2 | 0  | 0 |
| 2 | 0  | 0 |
| 1 | 31 | 3 |



|   |    |   |
|---|----|---|
| 2 | 0  | 0 |
| 2 | 0  | 0 |
| 2 | 0  | 0 |
| 2 | 0  | 0 |
| 1 | 31 | 3 |
| 1 | 31 | 3 |
| 2 | 0  | 0 |
| 2 | 0  | 0 |
| 2 | 0  | 0 |
| 2 | 0  | 0 |
| 2 | 32 | 4 |
| 2 | 0  | 0 |
| 2 | 0  | 0 |
| 2 | 0  | 0 |
| 2 | 0  | 0 |
| 2 | 0  | 0 |
| 2 | 0  | 0 |
| 2 | 0  | 0 |
| 2 | 0  | 0 |
| 1 | 31 | 3 |
| 2 | 0  | 0 |
| 2 | 0  | 0 |
| 1 | 31 | 3 |
| 1 | 31 | 3 |
| 2 | 0  | 0 |
| 2 | 0  | 0 |
| 1 | 31 | 3 |
| 2 | 0  | 0 |
| 2 | 0  | 0 |
| 2 | 0  | 0 |
| 2 | 32 | 4 |
| 2 | 0  | 0 |
| 2 | 0  | 0 |
| 2 | 0  | 0 |
| 2 | 0  | 0 |
| 1 | 31 | 3 |
| 2 | 0  | 0 |
| 2 | 0  | 0 |
| 2 | 21 | 2 |
| 2 | 0  | 0 |
| 2 | 21 | 2 |
| 1 | 31 | 3 |
| 1 | 31 | 3 |
| 2 | 0  | 0 |
| 1 | 31 | 3 |
| 1 | 31 | 3 |
| 1 | 31 | 3 |
| 2 | 21 | 2 |
| 2 | 0  | 0 |
| 1 | 31 | 3 |







|   |    |   |
|---|----|---|
| 1 | 31 | 3 |
| 2 | 0  | 0 |
| 2 | 0  | 0 |
| 2 | 0  | 0 |
| 2 | 0  | 0 |
| 2 | 0  | 0 |
| 2 | 0  | 0 |
| 2 | 0  | 0 |
| 1 | 31 | 3 |
| 2 | 0  | 0 |
| 1 | 31 | 3 |
| 2 | 1  | 1 |
| 2 | 0  | 0 |
| 1 | 31 | 3 |
| 2 | 0  | 0 |
| 2 | 32 | 4 |
| 1 | 31 | 3 |
| 2 | 21 | 2 |
| 2 | 0  | 0 |
| 1 | 31 | 3 |
| 2 | 0  | 0 |
| 2 | 0  | 0 |
| 2 | 21 | 2 |
| 2 | 0  | 0 |
| 2 | 0  | 0 |
| 2 | 0  | 0 |
| 2 | 0  | 0 |
| 2 | 0  | 0 |
| 1 | 31 | 3 |
| 1 | 31 | 3 |
| 2 | 0  | 0 |
| 2 | 32 | 4 |
| 2 | 22 | 2 |
| 2 | 0  | 0 |
| 2 | 0  | 0 |
| 2 | 0  | 0 |
| 2 | 21 | 2 |
| 1 | 31 | 3 |
| 2 | 0  | 0 |
| 1 | 31 | 3 |
| 2 | 0  | 0 |
| 1 | 31 | 3 |
| 1 | 31 | 3 |
| 2 | 0  | 0 |
| 2 | 0  | 0 |
| 2 | 0  | 0 |
| 1 | 31 | 3 |
| 1 | 31 | 3 |
| 1 | 31 | 3 |
| 1 | 31 | 3 |

|   |    |   |
|---|----|---|
| 2 | 21 | 2 |
| 2 | 0  | 0 |
| 2 | 32 | 4 |
| 2 | 21 | 2 |
| 2 | 0  | 0 |
| 1 | 31 | 3 |
| 1 | 31 | 3 |
| 2 | 0  | 0 |
| 2 | 0  | 0 |
| 1 | 31 | 3 |
| 2 | 21 | 2 |
| 2 | 0  | 0 |
| 2 | 0  | 0 |
| 2 | 0  | 0 |
| 1 | 31 | 3 |
| 2 | 21 | 2 |
| 2 | 0  | 0 |
| 2 | 0  | 0 |
| 1 | 31 | 3 |
| 1 | 31 | 3 |
| 2 | 0  | 0 |
| 2 | 0  | 0 |
| 1 | 31 | 3 |
| 1 | 31 | 3 |
| 2 | 21 | 2 |
| 1 | 31 | 3 |
| 1 | 31 | 3 |
| 2 | 0  | 0 |
| 2 | 0  | 0 |
| 2 | 0  | 0 |
| 2 | 0  | 0 |
| 1 | 31 | 3 |
| 1 | 31 | 3 |
| 2 | 21 | 2 |
| 1 | 31 | 3 |
| 2 | 0  | 0 |
| 2 | 0  | 0 |
| 1 | 31 | 3 |
| 1 | 31 | 3 |
| 2 | 21 | 2 |
| 2 | 0  | 0 |
| 1 | 31 | 3 |
| 2 | 0  | 0 |
| 2 | 21 | 2 |
| 1 | 31 | 3 |
| 1 | 31 | 3 |
| 1 | 31 | 3 |
| 1 | 31 | 3 |
| 1 | 31 | 3 |
| 1 | 31 | 3 |

|   |    |   |
|---|----|---|
| 2 | 0  | 0 |
| 2 | 1  | 1 |
| 2 | 0  | 0 |
| 2 | 0  | 0 |
| 1 | 31 | 3 |
| 1 | 31 | 3 |
| 2 | 0  | 0 |
| 2 | 32 | 4 |
| 1 | 31 | 3 |
| 2 | 0  | 0 |
| 1 | 32 | 4 |
| 2 | 0  | 0 |
| 2 | 21 | 2 |
| 1 | 31 | 3 |
| 2 | 0  | 0 |
| 2 | 0  | 0 |
| 1 | 31 | 3 |
| 1 | 32 | 4 |
| 1 | 31 | 3 |
| 2 | 0  | 0 |
| 2 | 32 | 4 |
| 2 | 0  | 0 |
| 2 | 0  | 0 |
| 2 | 21 | 2 |
| 2 | 0  | 0 |
| 1 | 31 | 3 |
| 2 | 0  | 0 |
| 1 | 31 | 3 |
| 1 | 31 | 3 |
| 2 | 0  | 0 |
| 2 | 0  | 0 |
| 2 | 0  | 0 |
| 1 | 31 | 3 |
| 2 | 0  | 0 |
| 2 | 0  | 0 |
| 2 | 0  | 0 |
| 2 | 0  | 0 |
| 2 | 0  | 0 |
| 2 | 0  | 0 |
| 2 | 0  | 0 |
| 2 | 0  | 0 |
| 1 | 32 | 4 |
| 1 | 31 | 3 |
| 2 | 0  | 0 |
| 2 | 0  | 0 |
| 2 | 0  | 0 |
| 2 | 0  | 0 |
| 1 | 31 | 3 |
| 2 | 21 | 2 |
| 2 | 0  | 0 |
| 2 | 0  | 0 |

|   |    |   |
|---|----|---|
| 2 | 1  | 1 |
| 1 | 31 | 3 |
| 2 | 0  | 0 |
| 1 | 31 | 3 |
| 1 | 31 | 3 |
| 1 | 31 | 3 |
| 1 | 31 | 3 |
| 2 | 0  | 0 |
| 1 | 31 | 3 |
| 2 | 0  | 0 |
| 2 | 0  | 0 |
| 2 | 21 | 2 |
| 2 | 0  | 0 |
| 1 | 31 | 3 |
| 1 | 31 | 3 |
| 2 | 0  | 0 |
| 2 | 0  | 0 |
| 2 | 0  | 0 |
| 2 | 0  | 0 |
| 2 | 32 | 4 |
| 2 | 0  | 0 |
| 2 | 0  | 0 |
| 2 | 0  | 0 |
| 2 | 22 | 2 |
| 2 | 32 | 4 |
| 2 | 0  | 0 |
| 1 | 31 | 3 |
| 1 | 32 | 4 |
| 1 | 31 | 3 |
| 2 | 0  | 0 |
| 2 | 0  | 0 |
| 1 | 31 | 3 |
| 2 | 0  | 0 |
| 2 | 0  | 0 |
| 1 | 31 | 3 |
| 2 | 0  | 0 |
| 2 | 0  | 0 |
| 1 | 31 | 3 |
| 2 | 0  | 0 |
| 2 | 32 | 4 |
| 2 | 0  | 0 |
| 2 | 21 | 2 |
| 2 | 0  | 0 |
| 2 | 21 | 2 |
| 2 | 21 | 2 |
| 2 | 21 | 2 |
| 2 | 0  | 0 |
| 2 | 32 | 4 |
| 2 | 0  | 0 |
| 2 | 21 | 2 |
| 2 | 0  | 0 |
| 1 | 31 | 3 |
| 2 | 0  | 0 |

|   |    |   |
|---|----|---|
| 2 | 32 | 4 |
| 2 | 21 | 2 |
| 2 | 0  | 0 |
| 1 | 31 | 3 |
| 1 | 31 | 3 |
| 1 | 31 | 3 |
| 2 | 0  | 0 |
| 2 | 0  | 0 |
| 1 | 31 | 3 |
| 1 | 31 | 3 |
| 2 | 0  | 0 |
| 2 | 0  | 0 |
| 1 | 31 | 3 |
| 2 | 21 | 2 |
| 1 | 31 | 3 |
| 2 | 21 | 2 |
| 1 | 31 | 3 |
| 2 | 21 | 2 |
| 2 | 0  | 0 |
| 2 | 21 | 2 |
| 1 | 31 | 3 |
| 2 | 0  | 0 |
| 1 | 31 | 3 |
| 2 | 0  | 0 |
| 2 | 0  | 0 |
| 2 | 0  | 0 |
| 2 | 0  | 0 |
| 1 | 31 | 3 |
| 2 | 0  | 0 |
| 1 | 31 | 3 |
| 2 | 0  | 0 |
| 2 | 0  | 0 |
| 2 | 0  | 0 |
| 1 | 31 | 3 |
| 2 | 0  | 0 |
| 2 | 0  | 0 |
| 2 | 21 | 2 |
| 1 | 31 | 3 |
| 2 | 21 | 2 |
| 1 | 31 | 3 |
| 1 | 32 | 4 |
| 2 | 0  | 0 |
| 1 | 32 | 4 |
| 2 | 0  | 0 |
| 2 | 32 | 4 |
| 2 | 21 | 2 |
| 1 | 31 | 3 |
| 2 | 0  | 0 |
| 2 | 0  | 0 |
| 1 | 31 | 3 |

|   |    |   |
|---|----|---|
| 2 | 32 | 4 |
| 1 | 32 | 4 |
| 2 | 0  | 0 |
| 1 | 31 | 3 |
| 2 | 0  | 0 |
| 2 | 0  | 0 |
| 2 | 21 | 2 |
| 1 | 31 | 3 |
| 1 | 31 | 3 |
| 2 | 32 | 4 |
| 2 | 0  | 0 |
| 2 | 0  | 0 |
| 2 | 0  | 0 |
| 2 | 0  | 0 |
| 2 | 0  | 0 |
| 2 | 21 | 2 |
| 1 | 31 | 3 |
| 2 | 32 | 4 |
| 2 | 0  | 0 |
| 2 | 32 | 4 |
| 2 | 0  | 0 |
| 2 | 0  | 0 |
| 2 | 21 | 2 |
| 2 | 0  | 0 |
| 1 | 31 | 3 |
| 1 | 31 | 3 |
| 1 | 31 | 3 |
| 1 | 31 | 3 |
| 2 | 0  | 0 |
| 2 | 0  | 0 |
| 2 | 0  | 0 |
| 1 | 31 | 3 |
| 2 | 0  | 0 |
| 2 | 0  | 0 |
| 2 | 32 | 4 |
| 2 | 0  | 0 |
| 2 | 0  | 0 |
| 2 | 0  | 0 |
| 2 | 0  | 0 |
| 2 | 0  | 0 |
| 2 | 0  | 0 |
| 2 | 0  | 0 |
| 2 | 0  | 0 |
| 2 | 0  | 0 |
| 2 | 0  | 0 |
| 2 | 0  | 0 |
| 2 | 0  | 0 |
| 2 | 0  | 0 |
| 2 | 0  | 0 |
| 2 | 0  | 0 |
| 1 | 31 | 3 |
| 1 | 32 | 4 |



|   |    |   |
|---|----|---|
| 2 | 0  | 0 |
| 2 | 0  | 0 |
| 2 | 0  | 0 |
| 1 | 31 | 3 |
| 2 | 0  | 0 |
| 2 | 0  | 0 |
| 2 | 0  | 0 |
| 2 | 1  | 1 |
| 2 | 0  | 0 |
| 2 | 0  | 0 |
| 1 | 31 | 3 |
| 2 | 0  | 0 |
| 2 | 0  | 0 |
| 1 | 31 | 3 |
| 1 | 31 | 3 |
| 2 | 0  | 0 |
| 1 | 31 | 3 |
| 2 | 0  | 0 |
| 2 | 32 | 4 |
| 2 | 0  | 0 |
| 2 | 21 | 2 |
| 2 | 21 | 2 |
| 2 | 0  | 0 |
| 1 | 31 | 3 |
| 2 | 32 | 4 |
| 2 | 0  | 0 |
| 2 | 0  | 0 |
| 1 | 32 | 4 |
| 1 | 31 | 3 |
| 2 | 0  | 0 |
| 2 | 0  | 0 |
| 2 | 0  | 0 |
| 2 | 0  | 0 |
| 2 | 0  | 0 |
| 2 | 0  | 0 |
| 1 | 31 | 3 |
| 2 | 0  | 0 |
| 2 | 0  | 0 |
| 2 | 21 | 2 |
| 2 | 21 | 2 |
| 1 | 31 | 3 |
| 2 | 0  | 0 |
| 2 | 0  | 0 |
| 2 | 0  | 0 |
| 2 | 0  | 0 |
| 2 | 0  | 0 |
| 2 | 0  | 0 |
| 1 | 31 | 3 |
| 2 | 32 | 4 |
| 2 | 0  | 0 |
| 1 | 31 | 3 |

|   |    |   |
|---|----|---|
| 2 | 0  | 0 |
| 2 | 0  | 0 |
| 2 | 0  | 0 |
| 2 | 0  | 0 |
| 2 | 0  | 0 |
| 2 | 0  | 0 |
| 2 | 0  | 0 |
| 2 | 0  | 0 |
| 2 | 0  | 0 |
| 2 | 0  | 0 |
| 1 | 31 | 3 |
| 1 | 31 | 3 |
| 2 | 21 | 2 |
| 2 | 0  | 0 |
| 2 | 0  | 0 |
| 2 | 0  | 0 |
| 2 | 0  | 0 |
| 2 | 0  | 0 |
| 1 | 31 | 3 |
| 2 | 21 | 2 |
| 1 | 31 | 3 |
| 1 | 31 | 3 |
| 2 | 0  | 0 |
| 2 | 0  | 0 |
| 1 | 31 | 3 |
| 2 | 0  | 0 |
| 2 | 0  | 0 |
| 2 | 0  | 0 |
| 2 | 0  | 0 |
| 2 | 21 | 2 |
| 2 | 21 | 2 |
| 2 | 0  | 0 |
| 2 | 21 | 2 |
| 2 | 0  | 0 |
| 2 | 0  | 0 |
| 1 | 31 | 3 |
| 2 | 0  | 0 |
| 1 | 31 | 3 |
| 2 | 0  | 0 |
| 1 | 31 | 3 |
| 1 | 31 | 3 |
| 1 | 31 | 3 |
| 2 | 21 | 2 |
| 1 | 31 | 3 |
| 2 | 21 | 2 |
| 2 | 0  | 0 |
| 2 | 21 | 2 |
| 2 | 21 | 2 |
| 2 | 0  | 0 |
| 2 | 21 | 2 |
| 2 | 0  | 0 |

|   |    |   |
|---|----|---|
| 2 | 0  | 0 |
| 1 | 31 | 3 |
| 2 | 0  | 0 |
| 2 | 0  | 0 |
| 2 | 0  | 0 |
| 2 | 0  | 0 |
| 2 | 1  | 1 |
| 2 | 0  | 0 |
| 2 | 0  | 0 |
| 2 | 21 | 2 |
| 2 | 32 | 4 |
| 2 | 0  | 0 |
| 2 | 22 | 2 |
| 1 | 31 | 3 |
| 2 | 0  | 0 |
| 1 | 32 | 4 |
| 2 | 1  | 1 |
| 2 | 0  | 0 |
| 2 | 0  | 0 |
| 2 | 0  | 0 |
| 1 | 31 | 3 |
| 2 | 0  | 0 |
| 2 | 0  | 0 |
| 2 | 32 | 4 |
| 2 | 0  | 0 |
| 2 | 0  | 0 |
| 2 | 1  | 1 |
| 2 | 0  | 0 |
| 2 | 0  | 0 |
| 2 | 0  | 0 |
| 2 | 0  | 0 |
| 2 | 0  | 0 |
| 2 | 0  | 0 |
| 2 | 1  | 1 |
| 2 | 1  | 1 |
| 2 | 1  | 1 |
| 2 | 0  | 0 |
| 2 | 0  | 0 |
| 2 | 0  | 0 |
| 2 | 1  | 1 |
| 1 | 31 | 3 |
| 2 | 0  | 0 |
| 2 | 1  | 1 |
| 2 | 21 | 2 |
| 1 | 31 | 3 |
| 2 | 0  | 0 |
| 2 | 0  | 0 |
| 2 | 0  | 0 |
| 2 | 21 | 2 |
| 1 | 31 | 3 |

|   |    |   |
|---|----|---|
| 2 | 0  | 0 |
| 2 | 21 | 2 |
| 2 | 0  | 0 |
| 2 | 0  | 0 |
| 2 | 0  | 0 |
| 2 | 1  | 1 |
| 1 | 31 | 3 |
| 2 | 0  | 0 |
| 2 | 0  | 0 |
| 2 | 32 | 4 |
| 1 | 31 | 3 |
| 2 | 0  | 0 |
| 2 | 0  | 0 |
| 2 | 0  | 0 |
| 2 | 21 | 2 |
| 2 | 0  | 0 |
| 2 | 0  | 0 |
| 2 | 0  | 0 |
| 2 | 32 | 4 |
| 1 | 31 | 3 |
| 2 | 21 | 2 |
| 2 | 1  | 1 |
| 2 | 0  | 0 |
| 2 | 0  | 0 |
| 2 | 0  | 0 |
| 2 | 21 | 2 |
| 2 | 1  | 1 |
| 2 | 0  | 0 |
| 2 | 21 | 2 |
| 2 | 0  | 0 |
| 2 | 0  | 0 |
| 2 | 32 | 4 |
| 2 | 0  | 0 |
| 2 | 21 | 2 |
| 2 | 21 | 2 |
| 1 | 31 | 3 |
| 2 | 0  | 0 |
| 2 | 0  | 0 |
| 1 | 31 | 3 |
| 2 | 21 | 2 |
| 2 | 0  | 0 |
| 1 | 31 | 3 |
| 2 | 21 | 2 |
| 2 | 0  | 0 |
| 2 | 0  | 0 |
| 2 | 21 | 2 |
| 2 | 0  | 0 |
| 2 | 0  | 0 |
| 2 | 0  | 0 |
| 1 | 31 | 3 |

|   |    |   |
|---|----|---|
| 1 | 31 | 3 |
| 2 | 21 | 2 |
| 2 | 0  | 0 |
| 2 | 21 | 2 |
| 2 | 21 | 2 |
| 2 | 21 | 2 |
| 2 | 0  | 0 |
| 1 | 31 | 3 |
| 2 | 0  | 0 |
| 2 | 32 | 4 |
| 1 | 31 | 3 |
| 2 | 0  | 0 |
| 2 | 21 | 2 |
| 2 | 0  | 0 |
| 2 | 0  | 0 |
| 2 | 0  | 0 |
| 2 | 0  | 0 |
| 2 | 0  | 0 |
| 2 | 21 | 2 |
| 1 | 31 | 3 |
| 2 | 21 | 2 |
| 1 | 31 | 3 |
| 2 | 21 | 2 |
| 1 | 31 | 3 |
| 2 | 21 | 2 |
| 2 | 0  | 0 |
| 1 | 31 | 3 |
| 2 | 0  | 0 |
| 2 | 0  | 0 |
| 2 | 0  | 0 |
| 2 | 0  | 0 |
| 2 | 0  | 0 |
| 2 | 0  | 0 |
| 2 | 21 | 2 |
| 2 | 0  | 0 |
| 2 | 0  | 0 |
| 2 | 0  | 0 |
| 2 | 1  | 1 |
| 2 | 21 | 2 |
| 2 | 0  | 0 |
| 2 | 21 | 2 |
| 2 | 32 | 4 |
| 2 | 0  | 0 |
| 2 | 21 | 2 |
| 2 | 21 | 2 |
| 1 | 31 | 3 |
| 2 | 0  | 0 |
| 2 | 0  | 0 |
| 1 | 31 | 3 |
| 2 | 21 | 2 |
| 2 | 0  | 0 |

|   |    |   |
|---|----|---|
| 2 | 21 | 2 |
| 2 | 0  | 0 |
| 2 | 21 | 2 |
| 2 | 0  | 0 |
| 2 | 0  | 0 |
| 2 | 1  | 1 |
| 1 | 31 | 3 |
| 2 | 0  | 0 |
| 2 | 1  | 1 |
| 2 | 0  | 0 |
| 2 | 21 | 2 |
| 1 | 31 | 3 |
| 2 | 0  | 0 |
| 2 | 21 | 2 |
| 2 | 0  | 0 |
| 2 | 0  | 0 |
| 1 | 31 | 3 |
| 2 | 0  | 0 |
| 2 | 0  | 0 |
| 2 | 1  | 1 |
| 2 | 0  | 0 |
| 2 | 1  | 1 |
| 1 | 31 | 3 |
| 2 | 21 | 2 |
| 2 | 0  | 0 |
| 2 | 21 | 2 |
| 2 | 0  | 0 |
| 1 | 31 | 3 |
| 1 | 31 | 3 |
| 2 | 0  | 0 |
| 2 | 21 | 2 |
| 1 | 31 | 3 |
| 1 | 31 | 3 |
| 1 | 31 | 3 |
| 1 | 31 | 3 |
| 2 | 0  | 0 |
| 1 | 31 | 3 |
| 2 | 0  | 0 |
| 2 | 0  | 0 |
| 2 | 0  | 0 |
| 2 | 21 | 2 |
| 2 | 0  | 0 |
| 2 | 0  | 0 |
| 1 | 31 | 3 |
| 2 | 1  | 1 |
| 2 | 0  | 0 |
| 2 | 0  | 0 |
| 2 | 0  | 0 |
| 2 | 0  | 0 |
| 2 | 0  | 0 |
| 2 | 0  | 0 |

|   |   |   |
|---|---|---|
| 2 | 0 | 0 |
| 2 | 0 | 0 |
